# Supplementary material for: Tailored carbon dioxide capacity in carboxylate-based ionic liquids
Source: Royal Society of Chemistry journal article supplement (doi:10.1039/d4fd00052h), 2024-01-01
Supplement: d4fd00052h1.pdf [file d4fd00052h1.pdf]

# Tailored Carbon Dioxide Capacity in Carboxylate-Based Ionic Liquids

Nicolas Scaglione, Jocasta Avila, Agilio Pádua, and Margarida Costa Gomes\*

*Laboratoire de Chimie de l'ENS Lyon, CNRS and Université de Lyon, 46 allée d'Italie, 69364  
Lyon, France*

E-mail: margarida.costa-gomes@ens-lyon.fr

## Supplementary Information

### Contents

|          |                                                       |           |
|----------|-------------------------------------------------------|-----------|
| <b>1</b> | <b>Synthesis and Characterisation of the ILs</b>      | <b>3</b>  |
| 1.1      | Ionic liquids synthesis . . . . .                     | 3         |
| 1.2      | Density and molar volume . . . . .                    | 4         |
| 1.3      | Viscosity . . . . .                                   | 6         |
| 1.4      | Thermal analysis . . . . .                            | 7         |
| 1.5      | Force field . . . . .                                 | 11        |
| 1.6      | Microscopic structure of the ILs . . . . .            | 11        |
| 1.7      | Small angle X-ray scattering . . . . .                | 15        |
| <b>2</b> | <b>Gas absorption data</b>                            | <b>16</b> |
| <b>3</b> | <b>CO<sub>2</sub> absorption model</b>                | <b>22</b> |
| <b>4</b> | <b>NMR before and after CO<sub>2</sub> absorption</b> | <b>23</b> |
| 4.1      | [P <sub>4,4,4,4</sub> ][2-ClPyCOO] . . . . .          | 23        |

|          |                                                              |           |
|----------|--------------------------------------------------------------|-----------|
| 4.2      | [P <sub>4,4,4,4</sub> ][2-ClPhC <sub>1</sub> OHCOO]          | 23        |
| 4.3      | [P <sub>4,4,4,4</sub> ][PhSC <sub>1</sub> COO]               | 24        |
| 4.4      | [P <sub>4,4,4,4</sub> ][PhC <sub>1</sub> COO]                | 25        |
| 4.5      | [P <sub>4,4,4,4</sub> ][C <sub>1</sub> COO]                  | 26        |
| 4.6      | [P <sub>4,4,4,4</sub> ][MeC <sub>3</sub> COO]                | 27        |
| 4.7      | [P <sub>4,4,4,4</sub> ][c-C <sub>6</sub> COO]                | 28        |
| 4.8      | [P <sub>4,4,4,4</sub> ][C <sub>5</sub> COO]                  | 29        |
| 4.9      | [P <sub>4,4,4,4</sub> ][C <sub>11</sub> COO]                 | 30        |
| 4.10     | [P <sub>6,6,6,14</sub> ][C <sub>11</sub> COO]                | 31        |
| 4.11     | [P <sub>4,4,4,4</sub> ][Me <sub>4</sub> C <sub>4</sub> COO]  | 32        |
| 4.12     | [P <sub>6,6,6,14</sub> ][Me <sub>4</sub> C <sub>4</sub> COO] | 35        |
| 4.13     | DOSY experiments                                             | 37        |
| <b>5</b> | <b>FT-IR measurements</b>                                    | <b>39</b> |
| <b>6</b> | <b>Molecular Dynamics Simulations</b>                        | <b>40</b> |
| <b>7</b> | <b><i>Ab initio</i> calculations</b>                         | <b>45</b> |
|          | <b>References</b>                                            | <b>49</b> |

# 1 Synthesis and Characterisation of the ILs

## 1.1 Ionic liquids synthesis

[P<sub>4,4,4,4</sub>][2-ClPyCOO], [P<sub>4,4,4,4</sub>][2-ClPhC<sub>1</sub>OHCOO] and [P<sub>4,4,4,4</sub>][PhSC<sub>1</sub>COO], whose structures are represented in Figure S1 were synthesized and characterized as described in our previous work.<sup>1</sup>

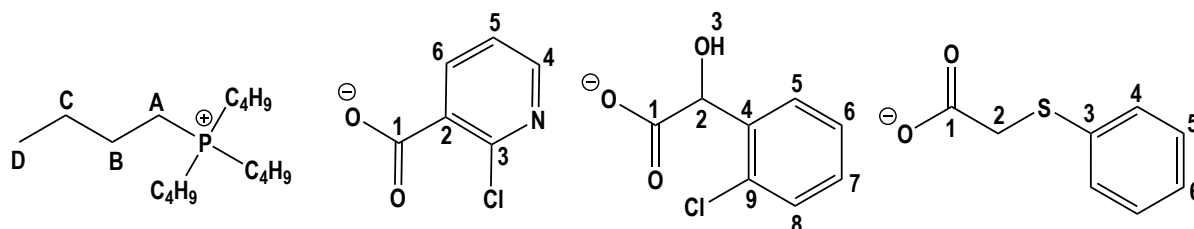

Figure S1 – Chemical structure of the newly prepared ILs: [P<sub>4,4,4,4</sub>][2-ClPyCOO], [P<sub>4,4,4,4</sub>][2-ClPhC<sub>1</sub>OHCOO] and [P<sub>4,4,4,4</sub>][PhSC<sub>1</sub>COO].

**Tetrabutylphosphonium 2-chloropyridine-3-carboxylate [P<sub>4,4,4,4</sub>][2-ClPyCOO]**, the yellowish liquid obtained from the rotary evaporator was dried under vacuum ( $1 \times 10^{-4}$  bar) at 323 K under stirring (400 rpm). The product was collected as a yellowish viscous liquid. <sup>1</sup>H NMR (400 MHz, C<sub>6</sub>D<sub>6</sub>, 343 K)  $\delta$  ppm: 0.71 (t, 12H, <sup>3</sup>J<sub>HH</sub> = 7.2 Hz, D); 1.25 (m, 8H, C); 1.40 (m, 8H, B); 2.34 (m, 8H, A); 7.14 (t, 1H, <sup>3</sup>J<sub>HH</sub> = 4.9 Hz, 5); 7.63 (d, 1H, <sup>3</sup>J<sub>HH</sub> = 7.0 Hz, 6); 8.02 (m, 1H, 4). <sup>13</sup>C NMR (100 MHz, C<sub>6</sub>D<sub>6</sub>, 343 K)  $\delta$  ppm: 12.43 (4C, D); 17.57 (4C, A); 22.70 (7C, B); 22.88 (4C, C); 121.54 (1C, 5); 136.33 (1C, 6); 139.71 (1C, 2); 145.60 (1C, 4); 146.43 (1C, 3); 166.01 (1C, 1). <sup>31</sup>P NMR (161 MHz, C<sub>6</sub>D<sub>6</sub>, 343 K)  $\delta$  ppm: 33.66 (1P, P((CH<sub>2</sub>)<sub>3</sub>CH<sub>3</sub>)<sub>4</sub>).  $\nu$  (cm<sup>-1</sup>): 2959; 2932; 2903; 2872; 1609; 1570; 1466; 1410; 1386; 1349; 1321; 1281; 1232; 1191; 1157; 1118; 1099; 1062; 1035; 1005; 969; 919; 909; 828; 812; 779; 752; 727; 643; 567; 554. MS ES<sup>+</sup> m/z (% Rel. Intensity): 259 (100, [P<sub>4,4,4,4</sub>]<sup>+</sup>). MS ES<sup>-</sup> m/z (% Rel. Intensity): 156 (100, [2-ClPyCOO]<sup>-</sup>).

**Tetrabutylphosphonium 2-(2-chlorophenylacetate)-2-hydroxyacetate [P<sub>4,4,4,4</sub>][2-ClPhC<sub>1</sub>OHCOO]**, the yellowish viscous liquid obtained from the rotary evaporator was dried under vacuum ( $1 \times 10^{-4}$  bar) at 323 K under stirring (400 rpm). The product was collected as a dark yellowish viscous liquid.

<sup>1</sup>H NMR (400 MHz, C<sub>6</sub>D<sub>6</sub>, 343 K)  $\delta$  ppm: 0.71 (t, 12H, <sup>3</sup>J<sub>HH</sub> = Hz, D); 1.20 (m, 14H, B+C); 2.04 (m, 8H, A); 4.79 (s, 1H, 2); 5.55 (s, 1H, 3); 6.95 (m, 2H, 7+8); 7.05 (m, 1H, 5); 7.24 (m,

1H, 6). <sup>13</sup>C NMR (100 MHz, C<sub>6</sub>D<sub>6</sub>, 343 K) δ ppm: 12.37 (4C, D); 17.33 (4C, A); 22.51 (4C, B); 22.80 (4C, C); 70.10 (1C, 2); 125.25 (1C, 7); 126.30 (1C, 8); 127.52 (1C, 6); 127.77 (1C, 5); 132.77 (1C, 4); 142.59 (1C, 9); 171.85 (1C, 1). <sup>31</sup>P NMR (161 MHz, C<sub>6</sub>D<sub>6</sub>, 343 K) δ ppm: 33.23 (1P, P((CH<sub>2</sub>)<sub>3</sub>CH<sub>3</sub>)<sub>4</sub>). ν (cm<sup>-1</sup>): 3070; 2959; 2932; 2903; 2873; 1632; 1615; 1581; 1466; 1442; 1413; 1381; 1346; 1330; 1291; 1249; 1192; 1126; 1098; 1067; 1045; 1030; 1002; 969; 950; 925; 906; 871; 824; 782; 752; 722; 699; 609; 585; 570; 554. MS ES<sup>+</sup> m/z (% Rel. Intensity): 259 (100, [P<sub>4,4,4,4</sub>]<sup>+</sup>). MS ES<sup>-</sup> m/z (% Rel. Intensity): 185 (100, [2 - ClPhC<sub>1</sub>OHCOO]<sup>-</sup>).

**Tetrabutylphosphonium (thiophenyl)acetate [P<sub>4,4,4,4</sub>][PhSC<sub>1</sub>COO]**, the dark orange viscous liquid obtained from the rotary evaporator was dried under vacuum (1 × 10<sup>-4</sup> bar) at 323 K under stirring (400 rpm). The product was collected as a orange-brown solid after drying under vacuum.

<sup>1</sup>H NMR (400 MHz, C<sub>6</sub>D<sub>6</sub>, 343 K) δ ppm: <sup>1</sup>H NMR (400 MHz, C<sub>6</sub>D<sub>6</sub>, 343 K) δ ppm: 0.76 (t, 12H, <sup>3</sup>J<sub>HH</sub> = 7.4 Hz, D); 1.29 (m, 8H, C); 1.37 (m, 8H, B); 2.33 (m, 8H, A); 3.34 (s, 1H, 2); 6.87 (t, 1H, <sup>3</sup>J<sub>HH</sub> = 7.4 Hz, 6); 7.02 (m, 2H, <sup>3</sup>J<sub>HH</sub> = 7.6 Hz, 5); 7.14 (d, 2H, <sup>3</sup>J<sub>HH</sub> = 7.8 Hz, 4). <sup>13</sup>C NMR (100 MHz, C<sub>6</sub>D<sub>6</sub>, 343 K) δ ppm: 13.82 (4C, D); 18.87 (4C, A); 24.11, 24.29 (8C, B+C); 41.44 (1C, 2); 124.36 (1C, 6); 127.22 (2C, 4); 128.80 (2C, 5); 141.43 (1C, 3); 168.69 (1C, 1). <sup>31</sup>P NMR (161 MHz, C<sub>6</sub>D<sub>6</sub>, 343 K) δ ppm: 33.49 (1P, P((CH<sub>2</sub>)<sub>3</sub>CH<sub>3</sub>)<sub>4</sub>). ν (cm<sup>-1</sup>): 2957; 2930; 2908; 2872; 1609; 1585; 1560; 1480; 1465; 1443; 1405; 1380; 1343; 1321; 1239; 1204; 1180; 1090; 1068; 1048; 1026; 1009; 968; 912; 907; 808; 737; 701; 691; 581; 575; 570; 561; 556. MS ES<sup>+</sup> m/z (% Rel. Intensity): 259 (100, [P<sub>4,4,4,4</sub>]<sup>+</sup>). MS ES<sup>-</sup> m/z (% Rel. Intensity): 167 (100, [PhSC<sub>1</sub>COO]<sup>-</sup>).

## 1.2 Density and molar volume

The experimental densities ( $\rho$ ) and molar volumes ( $V_m$ ) of the three new ILs are plotted in Figure S2 and listed in Table S1 along with the deviations of linear fits with temperature whose coefficients are listed in Tables S2 and S3, respectively. The presence of aromatic ring substituents in the carboxylate anions appears to result in denser ILs.

The  $V_m$  of these newly prepared ILs is additive and could be predicted using a group contribution method (GCM).<sup>2</sup> The calculated  $V_m$  agree with experimental values to within 2 % as

represented in Figure S2. The group contribution parameters are reported in Table S4.

Table S1 – Experimental densities and molar volumes of  $[P_{4,4,4,4}][2 - ClPyCOO]$ ,  $[P_{4,4,4,4}][2 - ClPhC_1OHCOO]$  and  $[P_{4,4,4,4}][PhSC_1COO]$  in the temperature range of 293–363 K. The deviations ( $\delta$ ) reported are relative to the fitting polynomials with coefficients listed in Table S2 and Table S3.

| $\frac{T}{K}$                | $\frac{\rho}{g\ cm^{-3}}$ | $\frac{\delta}{\%}$ | $\frac{V_m}{cm^3\ mol^{-1}}$ | $\frac{\delta}{\%}$ | $\frac{T}{K}$                     | $\frac{\rho}{g\ cm^{-3}}$ | $\frac{\delta}{\%}$ | $\frac{V_m}{cm^3\ mol^{-1}}$ | $\frac{\delta}{\%}$ |
|------------------------------|---------------------------|---------------------|------------------------------|---------------------|-----------------------------------|---------------------------|---------------------|------------------------------|---------------------|
| $[P_{4,4,4,4}][2 - ClPyCOO]$ |                           |                     |                              |                     | $[P_{4,4,4,4}][2 - ClPhC_1OHCOO]$ |                           |                     |                              |                     |
| 293.149                      | 1.06170                   | 0.003               | 391.81                       | 0.02                | 293.151                           | 1.06261                   | 0.001               | 418.80                       | 0.02                |
| 298.152                      | 1.05860                   | 0.005               | 392.96                       | 0.00                | 298.150                           | 1.05966                   | 0.01                | 419.96                       | 0.0005              |
| 303.151                      | 1.05546                   | 0.003               | 394.13                       | 0.002               | 303.152                           | 1.05653                   | 0.005               | 421.21                       | 0.004               |
| 313.152                      | 1.04917                   | 0.003               | 396.49                       | 0.01                | 313.152                           | 1.05030                   | 0.004               | 423.71                       | 0.008               |
| 323.152                      | 1.04291                   | 0.006               | 398.87                       | 0.01                | 323.152                           | 1.04412                   | 0.008               | 426.21                       | 0.01                |
| 333.152                      | 1.03667                   | 0.007               | 401.27                       | 0.01                | 333.152                           | 1.03799                   | 0.008               | 428.73                       | 0.01                |
| 343.152                      | 1.03046                   | 0.005               | 403.69                       | 0.006               | 343.151                           | 1.03188                   | 0.005               | 431.27                       | 0.005               |
| 353.152                      | 1.02430                   | 0.0006              | 406.12                       | 0.003               | 353.152                           | 1.02580                   | 0.0003              | 433.83                       | 0.004               |
| 363.152                      | 1.01817                   | 0.01                | 408.57                       | 0.02                | 363.152                           | 1.01977                   | 0.01                | 436.39                       | 0.01                |
| $[P_{4,4,4,4}][PhSC_1COO]$   |                           |                     |                              |                     |                                   |                           |                     |                              |                     |
| 313.148                      | 1.01071                   | 0.007               | 422.12                       | 0.006               |                                   |                           |                     |                              |                     |
| 323.148                      | 1.00451                   | 0.001               | 424.72                       | 0.002               |                                   |                           |                     |                              |                     |
| 333.148                      | 0.99834                   | 0.006               | 427.35                       | 0.004               |                                   |                           |                     |                              |                     |
| 343.148                      | 0.99223                   | 0.006               | 429.98                       | 0.004               |                                   |                           |                     |                              |                     |
| 353.148                      | 0.98616                   | 0.001               | 432.63                       | 0.001               |                                   |                           |                     |                              |                     |
| 363.152                      | 0.98012                   | 0.007               | 435.29                       | 0.006               |                                   |                           |                     |                              |                     |

Table S2 – Fitting parameters  $A_0$  and  $A_1$  determined from the linear fitting of the experimental densities to  $\rho = A_0 + A_1T$  and the corresponding absolute average deviation (AAD).

| Sample                            | $\frac{A_0}{g\ cm^{-3}}$ | $\frac{A_1}{g\ cm^{-3}\ K}$ | $\frac{AAD}{\%}$ |
|-----------------------------------|--------------------------|-----------------------------|------------------|
| $[P_{4,4,4,4}][2 - ClPyCOO]$      | 1.2443                   | $-6.2290 \times 10^{-4}$    | 0.004            |
| $[P_{4,4,4,4}][2 - ClPhC_1OHCOO]$ | 1.2425                   | $-6.1377 \times 10^{-4}$    | 0.005            |
| $[P_{4,4,4,4}][PhSC_1COO]$        | 1.2022                   | $-6.1173 \times 10^{-4}$    | 0.004            |

Table S3 – Fitting parameters  $B_0$  and  $B_1$  determined from the linear fitting of the experimental molar volumes to  $M_v = B_0 + B_1T$  and the corresponding absolute average deviation (AAD).

| Sample                            | $\frac{M}{g\ mol^{-1}}$ | $\frac{B_0}{cm^3\ mol^{-1}}$ | $\frac{B_1}{cm^3\ mol^{-1}\ K}$ | $\frac{AAD}{\%}$ |
|-----------------------------------|-------------------------|------------------------------|---------------------------------|------------------|
| $[P_{4,4,4,4}][2 - ClPyCOO]$      | 415.99                  | 321.56                       | 0.23940                         | 0.009            |
| $[P_{4,4,4,4}][2 - ClPhC_1OHCOO]$ | 445.02                  | 344.91                       | 0.25174                         | 0.009            |
| $[P_{4,4,4,4}][PhSC_1COO]$        | 426.64                  | 339.59                       | 0.26340                         | 0.004            |

Table S4 – Group contribution parameters used to calculate the molar volume of cation and anion as a function of temperature.

| Group j                              | $C_0$<br>$\text{cm}^3 \text{mol}^{-1}$ | $C_1$<br>$\text{cm}^3 \text{mol}^{-1} \text{K}$ | $C_2$<br>$\text{cm}^3 \text{mol}^{-1} \text{K}^2$ | Ref. |
|--------------------------------------|----------------------------------------|-------------------------------------------------|---------------------------------------------------|------|
| –CH <sub>2</sub>                     | 16.967                                 | $1.399 \times 10^{-3}$                          | $-1.946 \times 10^{-6}$                           | 2    |
| –CH <sub>2</sub> –Ph                 | 80.185                                 | $1.344 \times 10^{-1}$                          | $1.230 \times 10^{-4}$                            | 2*   |
| –OH                                  | 10.624                                 | $-3.319 \times 10^{-2}$                         | $-4.034 \times 10^{-5}$                           | 2*   |
| –Cl                                  | 26.830                                 | $-7.000 \times 10^{-4}$                         | $-4.250 \times 10^{-5}$                           | 2    |
| –S –                                 | 23.361                                 | $-1.814 \times 10^{-1}$                         | $2.770 \times 10^{-3}$                            | 3† * |
| –ClPy                                | 78.449                                 | $7.872 \times 10^{-2}$                          | $4.3316 \times 10^{-4}$                           | 2*   |
| –COO <sup>–</sup>                    | 21.680                                 | $3.101 \times 10^{-2}$                          | $-4.333 \times 10^{-4}$                           | 4    |
| –CH <sub>3</sub> COO <sup>–</sup>    | 49.177                                 | $2.149 \times 10^{-2}$                          | $-2.775 \times 10^{-5}$                           | 2    |
| [P <sub>4,4,4,4</sub> ] <sup>+</sup> | 290.987                                | $3.192 \times 10^{-1}$                          | $1.436 \times 10^{-5}$                            | 2*   |

\* Calculated by subtraction of parameters available in the reference.

† Calculated from the density data from the reference with temperatures ranging from 283 to 343 K.

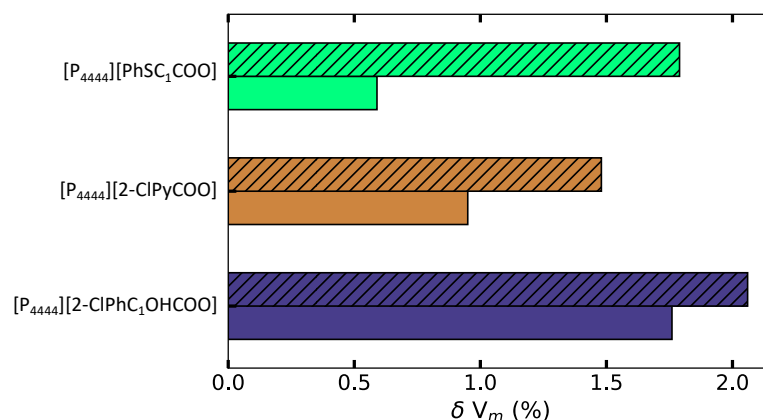

Figure S2 – Deviation of the predicted molar volumes<sup>2</sup> ( $V_m$  pred.) from the experimental values ( $V_m$  exp.) at 333 K (plain bars) and 353 K (textured bars).

### 1.3 Viscosity

The measured viscosity of the newly prepared ILs are listed in Table S5.

The experimental viscosities were fitted with temperature by using the Vogel-Fulcher-Tammann (VTF) equation:

$$\eta = A \exp\left(\frac{B}{T - T_0}\right) \quad (\text{S1})$$

where  $\eta$  is the dynamic viscosity,  $T$  the temperature, and  $A$ ,  $B$ , and  $T_0$  are adjustable parameters. Their values for the ILs newly prepared are provided in Table S6. The experimental data are well repre-

sented by the fits with absolute average deviations (AAD) of up to 2.7 %.

Table S5 – Experimental viscosities of  $[P_{4,4,4,4}][PhSC_1COO]$ ,  $[P_{4,4,4,4}][2-CIPyCOO]$  and  $[P_{4,4,4,4}][2-CIPhC_1OHCOO]$  in the temperature range of 303–363 K. The deviations ( $\delta$ ) reported are relative to the fitting of the VFT function with coefficients listed in Table S6.

| $\frac{T}{K}$              | $\frac{\eta}{mPa\ s}$ | $\frac{\delta}{\%}$ | $\frac{T}{K}$                   | $\frac{\eta}{mPa\ s}$ | $\frac{\delta}{\%}$ | $\frac{T}{K}$              | $\frac{\eta}{mPa\ s}$ | $\frac{\delta}{\%}$ |
|----------------------------|-----------------------|---------------------|---------------------------------|-----------------------|---------------------|----------------------------|-----------------------|---------------------|
| $[P_{4,4,4,4}][2-CIPyCOO]$ |                       |                     | $[P_{4,4,4,4}][2-CIPhC_1OHCOO]$ |                       |                     | $[P_{4,4,4,4}][PhSC_1COO]$ |                       |                     |
| 303.15                     | 1222                  | 0.07                |                                 |                       |                     |                            |                       |                     |
| 313.15                     | 533.4                 | 1.1                 | 313.15                          | 752.5                 | 0.01                |                            |                       |                     |
| 323.15                     | 282.0                 | 3.11                | 323.15                          | 377.2                 | 0.1                 | 323.15                     | 119.1                 | 0.005               |
| 333.15                     | 156.3                 | 1.6                 | 333.15                          | 205.8                 | 0.2                 | 333.15                     | 72.90                 | 0.03                |
| 343.15                     | 89.20                 | 5.4                 | 343.15                          | 121.2                 | 0.3                 | 343.15                     | 47.49                 | 0.04                |
| 353.15                     | 59.54                 | 3.1                 | 353.15                          | 76.06                 | 0.03                | 353.15                     | 32.60                 | 0.08                |
| 363.15                     | 40.52                 | 4.4                 | 363.15                          | 50.73                 | 1.2                 | 363.15                     | 23.42                 | 0.1                 |

Table S6 – Fitting parameters  $A$ ,  $B$  and  $T_0$  determined from the fitting of the experimental viscosities to the VFT function and the corresponding absolute average deviation (AAD).

| Sample                          | $\frac{A}{mPa\ s}$ | $\frac{B}{K}$ | $\frac{T_0}{K}$ | $\frac{AAD}{\%}$ |
|---------------------------------|--------------------|---------------|-----------------|------------------|
| $[P_{4,4,4,4}][2-CIPyCOO]$      | 0.1635             | 884.18        | 204.01          | 2.7              |
| $[P_{4,4,4,4}][2-CIPhC_1OHCOO]$ | 0.0346             | 1341.83       | 178.81          | 0.31             |
| $[P_{4,4,4,4}][PhSC_1COO]$      | 0.0973             | 958.06        | 188.41          | 0.06             |

## 1.4 Thermal analysis

The melting points ( $T_{fus}$ ) and phase-transition temperatures ( $T_{trans}$ ) of the three newly synthesized ILs are listed in Table S7, and the corresponding thermograms are depicted in Figure S3. A melting point was only detected for  $[P_{4,4,4,4}][PhSC_1COO]$  at  $T_{fus} = 57.4\ ^\circ C$  and a solid-solid transition at  $T_{trans} = 48.9\ ^\circ C$ . The melting point of  $[P_{4,4,4,4}][PhSC_1COO]$  was verified using a melting point apparatus, providing an observable verification. For  $[P_{4,4,4,4}][2-CIPyCOO]$  and  $[P_{4,4,4,4}][2-CIPhC_1OHCOO]$ , glass transition temperatures ( $T_g$ ) were observed at  $-45.9\ ^\circ C$  and  $-44.0\ ^\circ C$ , respectively.  $[P_{4,4,4,4}][PhSC_1COO]$  also exhibits a glass transition, but at a lower temperature of  $-53.0\ ^\circ C$ .

Table S7 – Glass transition temperatures ( $T_g$ ), melting points ( $T_{fus}$ ) and crystallization temperatures ( $T_{cr}$ ) for  $[P_{4,4,4,4}][PhSC_1COO]$ ,  $[P_{4,4,4,4}][2-CIPyCOO]$  and  $[P_{4,4,4,4}][2-CIPhC_1OHCOO]$  measured in a DSC with a  $10\text{ K min}^{-1}$  heating or cooling rate.

| Sample                          | $T_g$<br>°C | $T_{trans}$ & $T_{fus}$<br>°C | $T_{cr}$<br>°C |
|---------------------------------|-------------|-------------------------------|----------------|
| $[P_{4,4,4,4}][2-CIPyCOO]$      | -45.9       | -                             | -              |
| $[P_{4,4,4,4}][2-CIPhC_1OHCOO]$ | -44.0       | -                             | -              |
| $[P_{4,4,4,4}][PhSC_1COO]$      | -53.4       | 46.1 & 57.6                   | -19.1          |

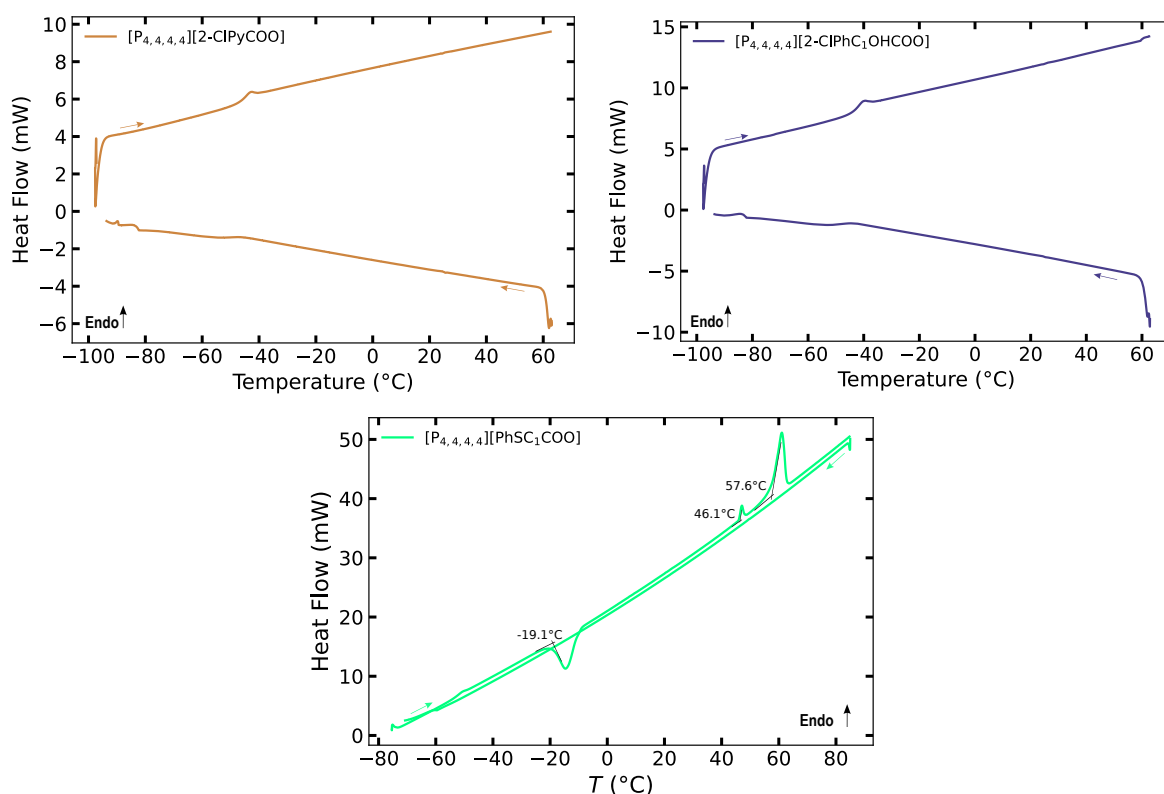

Figure S3 – Thermograms of  $[P_{4,4,4,4}][2-CIPyCOO]$ ,  $[P_{4,4,4,4}][2-CIPhC_1OHCOO]$  and  $[P_{4,4,4,4}][PhSC_1COO]$  measured at  $10\text{ K min}^{-1}$ .

The thermal stability of the three newly synthesized ILs was investigated under an  $O_2$  atmosphere, as the presence of  $O_2$  can potentially affect IL stability due to its oxidizing properties. The decomposition temperatures ( $T_{dec}$ ) of the ILs are listed in Table 1, and their corresponding thermographs are shown in Figure S4. Both  $[P_{4,4,4,4}][2-CIPyCOO]$  and  $[P_{4,4,4,4}][2-CIPhC_1OHCOO]$  exhibited a similar  $T_{dec}$  ( $261\text{ }^\circ\text{C}$ ), indicating comparable thermal stability. On the other hand, the  $T_{dec}$  of  $[P_{4,4,4,4}][PhSC_1COO]$  was slightly higher at ( $276\text{ }^\circ\text{C}$ ). Their decomposition temperatures are close to those of other ILs containing carboxylate anions containing aromatic moieties.<sup>1</sup>



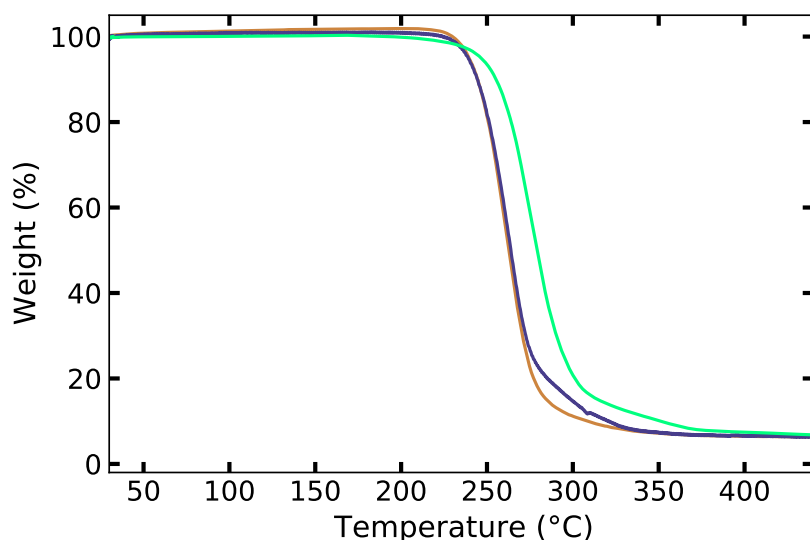

Figure S4 – TGA thermographs of —  $[P_{4,4,4,4}][2\text{-ClPyCOO}]$ , —  $[P_{4,4,4,4}][2\text{-ClPhC}_1\text{OHCOO}]$  and —  $[P_{4,4,4,4}][\text{PhSC}_1\text{COO}]$  with a heat rate of  $10\text{ }^\circ\text{C min}^{-1}$  under  $\text{O}_2$ . The decomposition temperatures were determined by the intersection of the tangents to the lines at low temperature and those corresponding to the rapid mass loss.

A considerable decrease in temperature was found from  $T_{\text{dec}}$  (254–345  $^\circ\text{C}$ ) to  $T_{0.01/10}$  (103–157  $^\circ\text{C}$ ), confirming the overestimation of temperature-ramped TGA measurements. The long-term stability order of the ILs is also different and increases as follows:  $[\text{C}_1\text{COO}]^- < [\text{MeC}_3\text{COO}]^- < [\text{Me}_4\text{C}_4\text{COO}]^- < [\text{C}_5\text{COO}]^- < [\text{C}_{11}\text{COO}]^- < [\text{c-C}_6\text{COO}]^- < [\text{PhSC}_1\text{COO}]^- < [\text{PhC}_1\text{COO}]^- < [\text{TetrazC}_1\text{COO}]^- < [2\text{-ClPyCOO}]^- < [2\text{-ClPhC}_1\text{OHCOO}]^-$  with  $[P_{4,4,4,4}]^+$  as common cation. When aromatic moieties are part of the carboxylate anions, higher  $T_{0.01/10}$  values were found while their  $T_{\text{dec}}$  values are significantly lower. These results highlight the importance of studying both long-term and short-term thermal stability when designing ILs for a given application. Interestingly enough, some trends remain consistent, such as the increased stability with the elongation of alkyl chain length in either the carboxylate anion or the phosphonium cation.

The pre-exponential factor  $A$  of the ILs containing  $[P_{4,4,4,4}]^+$  as cation increases following a different trend:  $[\text{C}_{11}\text{COO}]^- < [\text{PhSC}_1\text{COO}]^- < [\text{C}_1\text{COO}]^- \approx [\text{c-C}_6\text{COO}]^- \approx [\text{C}_5\text{COO}]^- < [\text{MeC}_3\text{COO}]^- < [\text{Me}_4\text{C}_4\text{COO}]^- < [\text{TetrazC}_1\text{COO}]^- < [\text{PhC}_1\text{COO}]^- < [2\text{-ClPhC}_1\text{OHCOO}]^- < [2\text{-ClPyCOO}]^-$ , with a difference of nearly 14 orders of magnitude between the two extremes. It indicates that the structure of the carboxylate anion substituent significantly influences the value of the pre-exponential factor  $A$ , with higher values corresponding to more mobile ions. However, the size of the cation does not play a decisive role, as  $[P_{6,6,6,14}][\text{C}_{11}\text{COO}]$  exhibits a higher  $A$  value than  $[P_{4,4,4,4}][\text{C}_{11}\text{COO}]$ , while the reverse trend is observed for  $[P_{6,6,6,14}][\text{Me}_4\text{C}_4\text{COO}]$  and  $[P_{4,4,4,4}][\text{Me}_4\text{C}_4\text{COO}]$ . Despite the superior long-term

thermal stability of ILs compared to  $[\text{C}_2\text{C}_1\text{im}][\text{C}_1\text{COO}]$  and  $[\text{C}_2\text{C}_1\text{C}_1\text{im}][\text{C}_1\text{COO}]$ , their activation energy ( $E_a$ ) values were either lower or within a similar range, with the exception of  $[\text{P}_{4,4,4,4}][\text{PhC}_1\text{COO}]$ ,  $[\text{P}_{4,4,4,4}][2-\text{ClPyCOO}]$ , and  $[\text{P}_{4,4,4,4}][2-\text{ClPhC}_1\text{OHCOO}]$ , which exhibited significantly higher  $E_a$ .

Table S8 – Long-term decomposition temperatures ( $T_{0.01/10}$ ), the activation energy ( $E_a$ ) and pre-exponential factor ( $A$ ) determined for all the ILs under study following the MacFarlane method<sup>5</sup> under an atmosphere of  $\text{O}_2$ .

| Sample                                                   | $T_{0.01/10}$<br>°C | $E_a$<br>kJ mol <sup>-1</sup> | $A$                   |
|----------------------------------------------------------|---------------------|-------------------------------|-----------------------|
| $[\text{P}_{4,4,4,4}][2-\text{ClPyCOO}]$                 | 156.8               | 194.56                        | $1.27 \times 10^{19}$ |
| $[\text{P}_{4,4,4,4}][\text{TetrazC}_1\text{COO}]^6$     | 132.5               | 115.00                        | $2.03 \times 10^{10}$ |
| $[\text{P}_{4,4,4,4}][2-\text{ClPhC}_1\text{OHCOO}]$     | 145.4               | 153.30                        | $4.26 \times 10^{14}$ |
| $[\text{P}_{4,4,4,4}][\text{C}_1\text{COO}]$             | 102.9               | 92.86                         | $1.23 \times 10^8$    |
| $[\text{P}_{4,4,4,4}][\text{PhSC}_1\text{COO}]$          | 122.9               | 83.83                         | $2.72 \times 10^6$    |
| $[\text{P}_{4,4,4,4}][\text{PhC}_1\text{COO}]$           | 124.0               | 143.38                        | $1.21 \times 10^{14}$ |
| $[\text{P}_{4,4,4,4}][\text{C}_1\text{COO}]$             | 102.9               | 92.86                         | $1.23 \times 10^8$    |
| $[\text{P}_{4,4,4,4}][\text{MeC}_3\text{COO}]$           | 108.8               | 97.88                         | $5.30 \times 10^8$    |
| $[\text{P}_{4,4,4,4}][\text{c-C}_6\text{COO}]$           | 118.0               | 95.22                         | $1.26 \times 10^8$    |
| $[\text{P}_{4,4,4,4}][\text{C}_5\text{COO}]$             | 112.3               | 93.51                         | $1.31 \times 10^8$    |
| $[\text{P}_{4,4,4,4}][\text{C}_{11}\text{COO}]$          | 114.1               | 85.06                         | $6.25 \times 10^5$    |
| $[\text{P}_{6,6,6,14}][\text{C}_{11}\text{COO}]$         | 123.0               | 93.77                         | $7.92 \times 10^7$    |
| $[\text{P}_{4,4,4,4}][\text{Me}_4\text{C}_4\text{COO}]$  | 110.7               | 105.06                        | $6.34 \times 10^9$    |
| $[\text{P}_{6,6,6,14}][\text{Me}_4\text{C}_4\text{COO}]$ | 124.9               | 95.59                         | $1.28 \times 10^8$    |

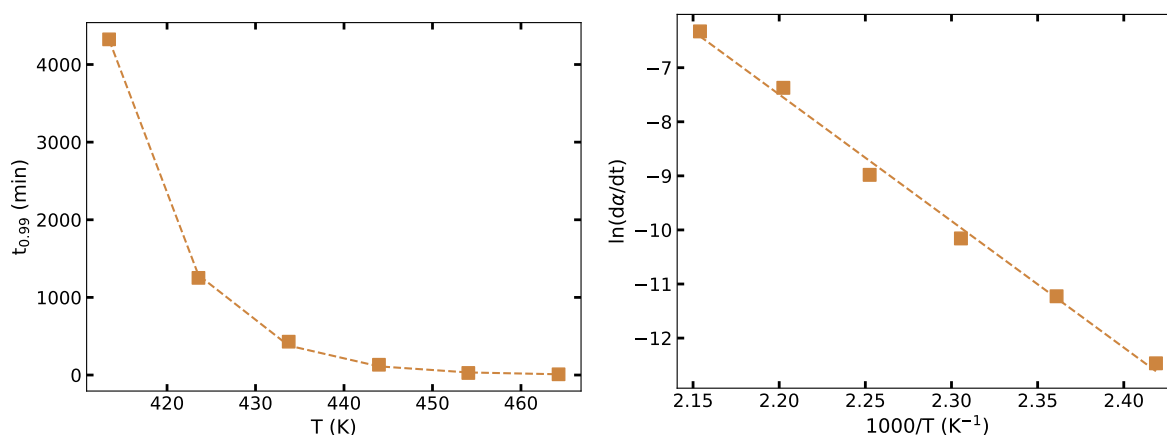

Figure S5 – Typical plot of (left)  $t_{0.99}$ , which is the time required to observe a decomposition of 1 % of the sample mass, as a function of temperature and (right) of  $\ln(\frac{d\alpha}{dt})$  as a function of  $1000/T$  for  $[\text{P}_{4,4,4,4}][2-\text{ClPyCOO}]$ . Similar behaviours are found for the other ILs studied. Points are experimental and dashed lines are fitted curves.

## 1.5 Force field

Table S9 – Calculated densities of  $[P_{4,4,4,4}][PhSC_1COO]$ ,  $[P_{4,4,4,4}][2-CIPyCOO]$  and  $[P_{4,4,4,4}][2-CIPhC_1OHCOO]$  with the new CL&Pol polarizable force field parameters<sup>7</sup> at different temperatures with the deviations from experimental densities.

| Sample                          | $\frac{T}{K}$ | $\frac{\rho_{exp}}{g\ cm^{-3}}$ | $\frac{\rho_{calc}}{g\ cm^{-3}}$ | $\frac{\delta}{\%}$ |
|---------------------------------|---------------|---------------------------------|----------------------------------|---------------------|
| $[P_{4,4,4,4}][2-CIPyCOO]$      | 303           | 1.05546                         | 1.04927                          | -0.59               |
|                                 | 343           | 1.03047                         | 1.02150                          | -0.87               |
| $[P_{4,4,4,4}][2-CIPhC_1OHCOO]$ | 303           | 1.05653                         | 1.05777                          | 0.11                |
|                                 | 343           | 1.03188                         | 1.02356                          | -0.81               |
| $[P_{4,4,4,4}][PhSC_1COO]$      | 343           | 0.99223                         | 0.98264                          | -0.97               |

The force field was also employed to determine the self-diffusion coefficients of the ILs by fitting the mean squared displacements (MSD) obtained from the MD trajectories. The MSD analysis was performed after reaching the diffusive regime, typically observed between 3 and 18 ns. The calculated coefficients were found to be slightly underestimated compared to the experimental values (Table S14), with differences typically ranging from 20–30 % (Table S10). Similar self-diffusion coefficients for both cations and anions were also calculated for all the ILs confirming this feature. Furthermore, the more viscous ILs exhibited lower self-diffusion coefficients compared to their less viscous counterparts.

Table S10 – Simulated self-diffusion coefficients of  $[P_{4,4,4,4}][2-CIPyCOO]$ ,  $[P_{4,4,4,4}][2-CIPhC_1OHCOO]$  and  $[P_{4,4,4,4}][PhSC_1COO]$  at 343 K by fitting the MSD calculated from MD simulations.

| Sample (simulated)              | $\frac{T}{K}$ | $\frac{D_{anion}}{m^2\ s^{-1}}$ | $\frac{D_{cation}}{m^2\ s^{-1}}$ |
|---------------------------------|---------------|---------------------------------|----------------------------------|
| $[P_{4,4,4,4}][2-CIPyCOO]$      | 343           | $1.05 \pm 0.003$                | $0.99 \pm 0.002$                 |
| $[P_{4,4,4,4}][2-CIPhC_1OHCOO]$ | 343           | $0.84 \pm 0.002$                | $0.85 \pm 0.003$                 |
| $[P_{4,4,4,4}][PhSC_1COO]$      | 343           | $0.96 \pm 0.003$                | $1.00 \pm 0.002$                 |

## 1.6 Microscopic structure of the ILs

Appropriate radial or spatial distribution functions (RDFs and SDFs, respectively) were calculated for the three ILs synthesized herein. The RDFs of the  $P^+$  and  $H_\alpha$  sites of the  $[P_{4,4,4,4}]^+$  cation around the carboxylate head group  $O_{COO^-}$  of the anions in  $[P_{4,4,4,4}][PhSC_1COO]$ ,  $[P_{4,4,4,4}][2-CIPyCOO]$ , and  $[P_{4,4,4,4}][2-CIPhC_1OHCOO]$  are shown in Figure S6 and compared with  $[P_{4,4,4,4}][PhC_1COO]$  as a representative example of the carboxylate ILs previously studied.<sup>1</sup>

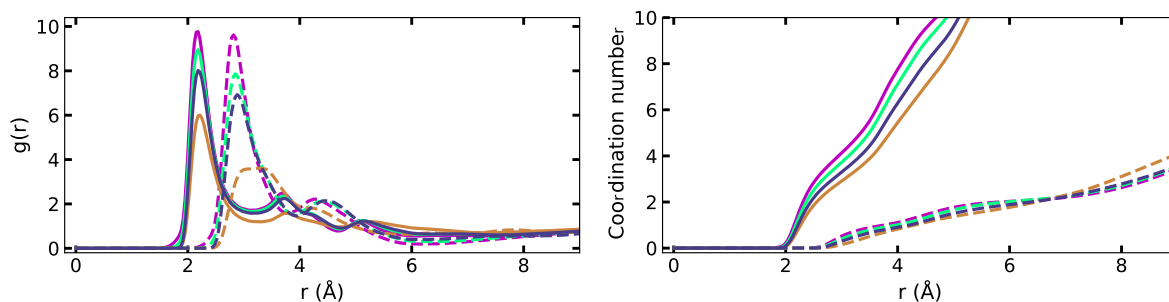

Figure S6 – Comparison of the site-site RDFs,  $g_{ij}(r)$ , of (dashed lines)  $P^+$  and (solid lines)  $H_\alpha$  of the cation around the negatively charged oxygen atoms  $O_{COO^-}$  of the carboxylate head of the anion and their corresponding coordination numbers in —  $[P_{4,4,4,4}][PhC_1COO]$ , —  $[P_{4,4,4,4}][2-CIPyCOO]$ , —  $[P_{4,4,4,4}][2-CIPhC_1OHCOO]$  and —  $[P_{4,4,4,4}][PhSC_1COO]$  at 343 K. The RDFs of  $[P_{4,4,4,4}][PhC_1COO]$  were used as a representative example of the other ILs previously studied.<sup>1</sup>

Only  $[P_{4,4,4,4}][2-CIPyCOO]$  exhibits slightly different RDFs between  $P^+$  and  $H_\alpha$  and  $O_{COO^-}$ , indicating a less significant correlation between these sites. This is further supported by the lower calculated coordination numbers (CNs) from approximately 1 and 4.5 to 0.79 and 3.35, respectively. Figure S7 (left) demonstrates that these reduced correlations arise from the presence of new correlations between the N of the carboxylate anion and  $P^+$  and  $H_\alpha$  of the phosphonium cation, as well as between Cl and  $H_\alpha$  as illustrated on the SDF Figure S8. In  $[P_{4,4,4,4}][2-CIPhC_1OHCOO]$ , Figure S7 (right) reveals a low correlation between the  $O_{OH}$  of the carboxylate anion and  $H_\alpha$  although it is not important enough to significantly affect the main interacting sites. These MD simulations provide valuable insights into the structural properties of the investigated ILs and offer a deeper understanding of their intermolecular interactions.

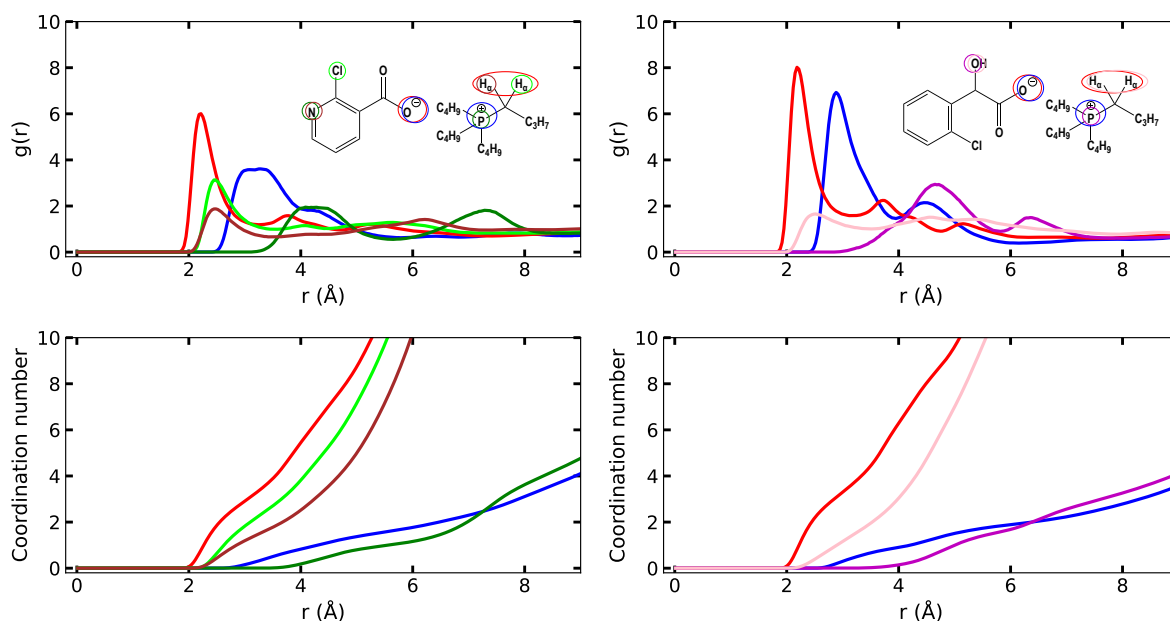

Figure S7 – Site-site RDFs,  $g_{ij}(r)$ , of —  $P^+$  and —  $H_\alpha$  of the cation around  $O_{\text{COO}^-}$  of the carboxylate anion and (left)  $H_\alpha$  around —  $\text{Cl}$  and —  $\text{N}$ , —  $P^+$  around  $\text{N}$  in  $[\text{P}_{4,4,4,4}][2-\text{ClPyCOO}]^-$ ; (right) —  $P^+$  and —  $H_\alpha$  of the cation around  $O_{\text{OH}}$  in  $[\text{P}_{4,4,4,4}][2-\text{ClPhC}_1\text{OHCOO}]^-$  at 343 K.

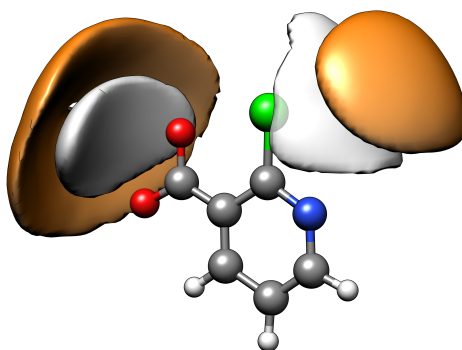

Figure S8 – The spatial distribution functions (SDFs) of  $P^+$  (in orange) and of the acidic protons  $H_\alpha$  (in white) around the  $O_{\text{COO}^-}$  of the  $[2-\text{ClPyCOO}]^-$  anion in  $[\text{P}_{4,4,4,4}][2-\text{ClPyCOO}]^-$  at 343 K. Isodensity contours at 14.7 and 7.9 times the average density around the central anion, respectively.

The combined distribution functions (CDFs) of the  $\text{C}_\alpha\text{-H}_\alpha \cdots \text{O}_{\text{COO}^-}$  angle as a function of the distance between the acidic proton  $H_\alpha$  and  $O_{\text{COO}^-}$  have also been calculated at 343 K (Figure S9). The CDFs reveal that not only the distance between the acidic proton and the carboxylate head are similar, but also the angles between them are identical at around  $120^\circ$  in these 3 new ILs. These angles are too low to be considered as proper hydrogen bonds.

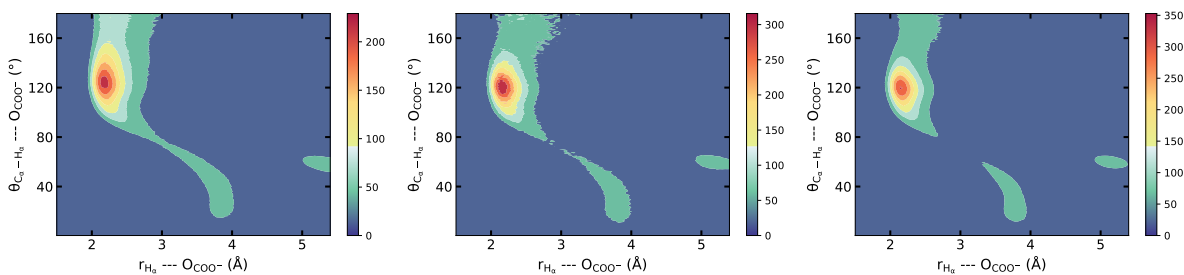

Figure S9 – Combined distribution functions (CDFs) of the  $C_\alpha-H_\alpha \cdots O_{COO^-}$  angle as a function of the distance between the acidic proton  $H_\alpha$  and the negatively charged  $O_{COO^-}$  in (left)  $[P_{4,4,4,4}][2-CIPyCOO]$ , (middle)  $[P_{4,4,4,4}][2-CIPhC_1OHCOO]$  and (right)  $[P_{4,4,4,4}][PhSC_1COO]$  at 343 K.

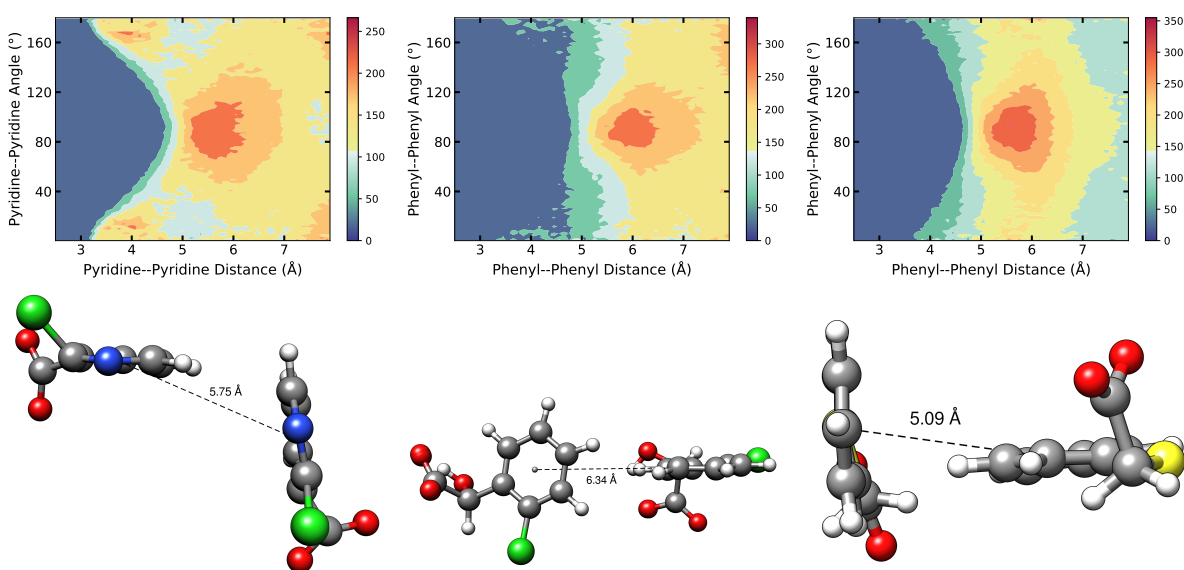

Figure S10 – CDFs of the angle between (left) two adjacent pyridine rings in  $[P_{4,4,4,4}][2-CIPyCOO]$ , two adjacent phenyl rings (middle) in  $[P_{4,4,4,4}][2-CIPhC_1OHCOO]$  and (right) in  $[P_{4,4,4,4}][PhSC_1COO]$  as a function of the RDF between their center of mass at 343 K. (Bottom) Snapshots from the molecular simulation box showing the most probable spatial configuration of two neighbour anions.

$[P_{4,4,4,4}][PhSC_1COO]$ ,  $[P_{4,4,4,4}][2-CIPyCOO]$  and  $[P_{4,4,4,4}][2-CIPhC_1OHCOO]$  are presenting peculiar spatial configurations that can be attributed to the presence of aromatic moieties in the carboxylate anions. While one could expect a  $\pi$ - $\pi$  stacking, the aromatic rings of the carboxylate anions are perpendicular to each other at a distance of 5.09, 5.75 and 6.34 Å, respectively. It is showed on the CDFs of the angle between two adjacent aromatic rings as a function of the RDF between their center of mass and illustrated by the snapshot from their molecular simulation box (Figure S10). This particular spatial configuration has also been found previously in the other ILs containing aromatic or aliphatic rings in the carboxylate anions.<sup>1</sup>

## 1.7 Small angle X-ray scattering

The experimental total structure factors of the three synthesised ILs are represented in Figure S11. The positions of the pre-peak, the shoulder and the principal peak are reported in Table S11. The total  $S(q)$  calculated by MD simulations agree with the experimental data and so the calculated partial structure factors can be used to get further insights about the structure of the ILs. No particular features could be identified in the three ILs prepared herein when compared with the ones previously characterized.<sup>1</sup>

Table S11 – SAXS diffraction peak positions,  $q$ , their corresponding real space length,  $d$ , and the ion pair diameter,  $D$ , of  $[P_{4,4,4,4}][2-CIPyCOO]$ ,  $[P_{4,4,4,4}][2-CIPhC_1OHCOO]$  and  $[P_{4,4,4,4}][PhSC_1COO]$ .  $D$  was estimated by taking the cubic root of the volume of a single ion pair of the IL which was calculated from its molar volume and by assuming a cubic packing geometry.<sup>8</sup>

| Sample                          | Pre-peak                    |                        | Shoulder peak               |                        | Principal peak              |                        | $\frac{D}{\text{\AA}}$ |
|---------------------------------|-----------------------------|------------------------|-----------------------------|------------------------|-----------------------------|------------------------|------------------------|
|                                 | $\frac{q}{\text{\AA}^{-1}}$ | $\frac{d}{\text{\AA}}$ | $\frac{q}{\text{\AA}^{-1}}$ | $\frac{d}{\text{\AA}}$ | $\frac{q}{\text{\AA}^{-1}}$ | $\frac{d}{\text{\AA}}$ |                        |
| $[P_{4,4,4,4}][2-CIPyCOO]$      | 0.57                        | 11.0                   | 0.72                        | 8.7                    | 1.38                        | 4.6                    | 8.7                    |
| $[P_{4,4,4,4}][2-CIPhC_1OHCOO]$ | 0.59                        | 10.6                   | 0.67                        | 9.4                    | 1.38                        | 4.6                    | 8.9                    |
| $[P_{4,4,4,4}][PhSC_1COO]$      | 0.58                        | 10.8                   | -                           | -                      | 1.46                        | 4.3                    | 8.9                    |

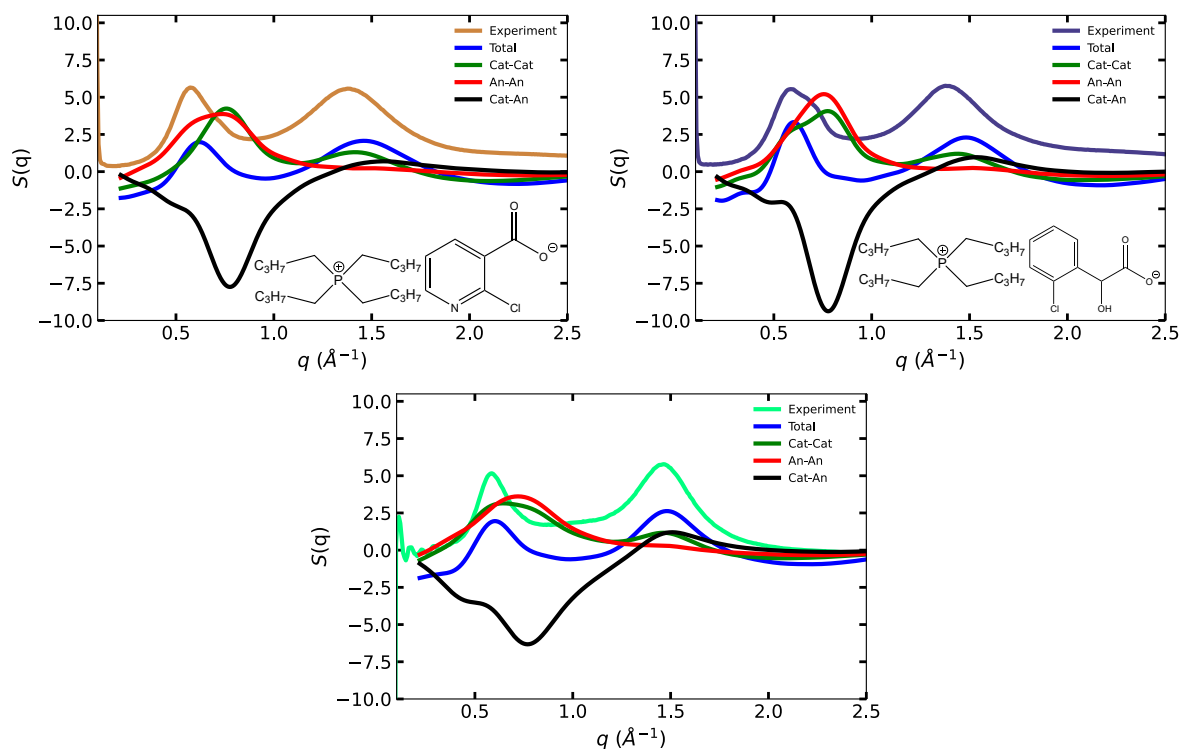

Figure S11 – Comparison of experimental with the total simulated  $S(q)$  as well as the partial  $S(q)$  for (top left)  $[P_{4,4,4,4}][2-CIPyCOO]$ , (top right)  $[P_{4,4,4,4}][2-CIPhC_1OHCOO]$  and (bottom)  $[P_{4,4,4,4}][PhSC_1COO]$ .

## 2 Gas absorption data

Table S12 – Absorption and desorption of CO<sub>2</sub> in the ILs as a function of pressure from 0–5 bar at either 303 K or 343 K.

| CO <sub>2</sub> - Absorption                          |                        |                   | CO <sub>2</sub> - Desorption |                        |                   |
|-------------------------------------------------------|------------------------|-------------------|------------------------------|------------------------|-------------------|
| $\frac{T}{\text{K}}$                                  | $\frac{P}{\text{bar}}$ | $x_{\text{CO}_2}$ | $\frac{T}{\text{K}}$         | $\frac{P}{\text{bar}}$ | $x_{\text{CO}_2}$ |
| [P <sub>4,4,4,4</sub> ][2 – ClPyCOO]                  |                        |                   |                              |                        |                   |
| 1 <sup>st</sup> cycle                                 |                        |                   |                              |                        |                   |
| 303.13                                                | 0.0000                 | 0.0000            | 303.13                       | 0.0000                 | 0.0000            |
| 303.14                                                | 0.2495                 | 0.0090            | 303.15                       | 0.2488                 | 0.0115            |
| 303.16                                                | 0.4982                 | 0.0148            | 303.16                       | 0.4982                 | 0.0191            |
| 303.15                                                | 0.7491                 | 0.0213            | 303.15                       | 0.7491                 | 0.0262            |
| 303.14                                                | 0.9995                 | 0.0280            | 303.15                       | 1.000                  | 0.0328            |
| 303.15                                                | 2.500                  | 0.0646            | 303.13                       | 2.499                  | 0.0702            |
| 303.14                                                | 4.999                  | 0.1150            | 303.14                       | 4.999                  | 0.115             |
| 312.29                                                | 0.0000                 | 0.0000            | 312.29                       | 0.0000                 | 0.0000            |
| 313.13                                                | 0.2494                 | 0.0045            | 313.12                       | 0.2484                 | 0.0063            |
| 313.12                                                | 0.4977                 | 0.0103            | 313.12                       | 0.4978                 | 0.0107            |
| 313.12                                                | 0.7497                 | 0.0140            | 313.14                       | 0.7490                 | 0.0149            |
| 313.11                                                | 0.9979                 | 0.0174            | 313.11                       | 0.9995                 | 0.0187            |
| 313.11                                                | 2.500                  | 0.0411            | 313.12                       | 2.499                  | 0.0428            |
| 313.13                                                | 4.999                  | 0.0789            | 313.13                       | 4.999                  | 0.0789            |
| 320.11                                                | 0.0000                 | 0.0000            | 320.16                       | 0.0000                 | 0.0000            |
| 323.11                                                | 0.2483                 | 0.0059            | 323.12                       | 0.2495                 | 0.0061            |
| 323.12                                                | 0.4984                 | 0.0092            | 323.10                       | 0.4978                 | 0.0094            |
| 323.12                                                | 0.7487                 | 0.0115            | 323.12                       | 0.7488                 | 0.0122            |
| 323.11                                                | 0.9991                 | 0.0135            | 323.11                       | 0.9991                 | 0.0144            |
| 323.12                                                | 2.500                  | 0.0372            | 323.10                       | 2.500                  | 0.0367            |
| 323.12                                                | 4.998                  | 0.0680            | 323.12                       | 4.998                  | 0.0680            |
| 336.53                                                | 0.0000                 | 0.0000            | 336.53                       | 0.0000                 | 0.0000            |
| 343.13                                                | 0.2499                 | 0.0052            | 343.08                       | 0.2487                 | 0.0036            |
| 343.07                                                | 0.4981                 | 0.0065            | 343.04                       | 0.4986                 | 0.0048            |
| 343.15                                                | 0.7480                 | 0.0065            | 343.09                       | 0.7499                 | 0.0051            |
| 343.11                                                | 0.9992                 | 0.0078            | 343.08                       | 0.9988                 | 0.0064            |
| 343.05                                                | 2.499                  | 0.0286            | 343.10                       | 2.499                  | 0.0282            |
| 343.05                                                | 4.998                  | 0.0513            | 343.05                       | 4.998                  | 0.0513            |
| [P <sub>4,4,4,4</sub> ][2 – ClPhC <sub>1</sub> OHCOO] |                        |                   |                              |                        |                   |
| 1 <sup>st</sup> cycle                                 |                        |                   |                              |                        |                   |
| 303.14                                                | 0.0000                 | 0.0000            | 303.14                       | 0.0000                 | 0.0000            |
| 303.14                                                | 0.2492                 | 0.0087            | 303.14                       | 0.2494                 | 0.0048            |
| 303.15                                                | 0.4974                 | 0.0134            | 303.16                       | 0.4978                 | 0.0109            |
| 303.14                                                | 0.7488                 | 0.0186            | 303.14                       | 0.7486                 | 0.0170            |
| 303.15                                                | 0.9992                 | 0.0236            | 303.16                       | 0.9989                 | 0.0225            |
| 303.14                                                | 2.500                  | 0.0545            | 303.13                       | 2.499                  | 0.0555            |
| 303.15                                                | 4.998                  | 0.1022            | 303.15                       | 4.998                  | 0.1022            |
| 312.73                                                | 0.0000                 | 0.0000            | 312.73                       | 0.0000                 | 0.0000            |



| CO <sub>2</sub> - Absorption                   |                        |                   | CO <sub>2</sub> - Desorption |                        |                   |
|------------------------------------------------|------------------------|-------------------|------------------------------|------------------------|-------------------|
| $\frac{T}{K}$                                  | $\frac{P}{\text{bar}}$ | $x_{\text{CO}_2}$ | $\frac{T}{K}$                | $\frac{P}{\text{bar}}$ | $x_{\text{CO}_2}$ |
| 313.09                                         | 0.2474                 | 0.0033            | 313.09                       | 0.2487                 | 0.0056            |
| 313.13                                         | 0.4972                 | 0.0101            | 313.14                       | 0.4985                 | 0.0104            |
| 313.10                                         | 0.7490                 | 0.0142            | 313.12                       | 0.7488                 | 0.0153            |
| 313.14                                         | 0.9993                 | 0.0180            | 313.11                       | 0.9997                 | 0.0194            |
| 313.12                                         | 2.499                  | 0.0438            | 313.09                       | 2.500                  | 0.0455            |
| 313.10                                         | 4.998                  | 0.0851            | 313.10                       | 4.998                  | 0.0851            |
| 318.41                                         | 0.0000                 | 0.0000            | 318.41                       | 0.0000                 | 0.0000            |
| 323.11                                         | 0.2492                 | 0.0061            | 323.12                       | 0.2474                 | 0.0064            |
| 323.14                                         | 0.4985                 | 0.0100            | 323.14                       | 0.4986                 | 0.0102            |
| 323.12                                         | 0.7477                 | 0.0125            | 323.13                       | 0.7490                 | 0.0126            |
| 323.12                                         | 0.9993                 | 0.0149            | 323.12                       | 0.9996                 | 0.0152            |
| 323.08                                         | 2.500                  | 0.0393            | 323.13                       | 2.499                  | 0.0399            |
| 323.13                                         | 5.000                  | 0.0750            | 323.13                       | 5.000                  | 0.0750            |
| 335.86                                         | 0.0000                 | 0.0000            | 335.86                       | 0.0000                 | 0.0000            |
| 343.12                                         | 0.2488                 | 0.0048            | 343.11                       | 0.2486                 | 0.0047            |
| 343.12                                         | 0.4993                 | 0.0055            | 343.09                       | 0.4979                 | 0.0059            |
| 343.10                                         | 0.7486                 | 0.0070            | 343.09                       | 0.7486                 | 0.0070            |
| 343.08                                         | 0.9991                 | 0.0108            | 343.12                       | 0.9995                 | 0.0108            |
| 343.09                                         | 2.500                  | 0.0316            | 343.12                       | 2.500                  | 0.0326            |
| 343.06                                         | 4.999                  | 0.0578            | 343.06                       | 4.999                  | 0.0578            |
| [P <sub>4,4,4,4</sub> ][PhSC <sub>1</sub> COO] |                        |                   |                              |                        |                   |
| 1 <sup>st</sup> cycle                          |                        |                   |                              |                        |                   |
| 320.14                                         | 0.0000                 | 0.0000            | 320.14                       | 0.0000                 | 0.0000            |
| 323.11                                         | 0.2487                 | 0.0041            | 323.12                       | 0.2494                 | 0.0065            |
| 323.12                                         | 0.4984                 | 0.0099            | 323.11                       | 0.4977                 | 0.0106            |
| 323.12                                         | 0.7490                 | 0.0126            | 323.12                       | 0.7486                 | 0.0143            |
| 323.11                                         | 1.0002                 | 0.0155            | 323.12                       | 0.9995                 | 0.0171            |
| 323.12                                         | 2.500                  | 0.0434            | 323.10                       | 2.500                  | 0.0441            |
| 323.12                                         | 4.999                  | 0.0801            | 323.12                       | 4.999                  | 0.0801            |
| 337.78                                         | 0.0000                 | 0.0000            | 337.78                       | 0.0000                 | 0.0000            |
| 343.06                                         | 0.2498                 | 0.0047            | 343.12                       | 0.2483                 | 0.0097            |
| 343.08                                         | 0.4986                 | 0.0048            | 343.10                       | 0.4981                 | 0.0099            |
| 343.07                                         | 0.7488                 | 0.0078            | 343.10                       | 0.7491                 | 0.0113            |
| 343.11                                         | 0.9986                 | 0.0119            | 343.09                       | 0.9991                 | 0.0143            |
| 343.14                                         | 2.500                  | 0.0345            | 343.13                       | 2.500                  | 0.0359            |
| 343.37                                         | 4.999                  | 0.0599            | 343.37                       | 4.999                  | 0.0599            |
| [P <sub>4,4,4,4</sub> ][PhC <sub>1</sub> COO]  |                        |                   |                              |                        |                   |
| 1 <sup>st</sup> cycle                          |                        |                   |                              |                        |                   |
| 323.04                                         | 0.0000                 | 0.0000            | 323.04                       | 0.0000                 | 0.0000            |
| 323.12                                         | 0.2501                 | 0.0669            | 323.11                       | 0.2491                 | 0.0884            |
| 323.11                                         | 0.4986                 | 0.0944            | 323.11                       | 0.4986                 | 0.1119            |
| 323.11                                         | 0.7490                 | 0.1171            | 323.12                       | 0.7470                 | 0.1288            |
| 323.12                                         | 0.9992                 | 0.1308            | 323.10                       | 0.9999                 | 0.1452            |
| 323.09                                         | 2.499                  | 0.1947            | 323.14                       | 2.500                  | 0.2086            |
| 323.09                                         | 4.999                  | 0.2540            | 323.10                       | 4.999                  | 0.254             |

| CO <sub>2</sub> - Absorption                  |                        |                   | CO <sub>2</sub> - Desorption |                        |                   |
|-----------------------------------------------|------------------------|-------------------|------------------------------|------------------------|-------------------|
| $\frac{T}{K}$                                 | $\frac{P}{\text{bar}}$ | $x_{\text{CO}_2}$ | $\frac{T}{K}$                | $\frac{P}{\text{bar}}$ | $x_{\text{CO}_2}$ |
| 343.10                                        | 0.0000                 | 0.0000            | 343.10                       | 0.0000                 | 0.0000            |
| 343.12                                        | 0.2490                 | 0.0552            | 343.13                       | 0.2501                 | 0.0609            |
| 343.12                                        | 0.4981                 | 0.0695            | 343.12                       | 0.4975                 | 0.0849            |
| 343.10                                        | 0.7490                 | 0.0790            | 343.12                       | 0.7488                 | 0.0943            |
| 343.10                                        | 0.9992                 | 0.0878            | 343.09                       | 0.9995                 | 0.1116            |
| 343.13                                        | 2.500                  | 0.1312            | 343.15                       | 2.498                  | 0.1449            |
| 343.11                                        | 4.998                  | 0.1750            | 343.11                       | 4.998                  | 0.1750            |
| 2 <sup>nd</sup> cycle                         |                        |                   |                              |                        |                   |
| 326.72                                        | 0.0000                 | 0.0000            | 326.72                       | 0.0000                 | 0.0000            |
| 323.12                                        | 0.2495                 | 0.0357            | 323.11                       | 0.2490                 | 0.0865            |
| 323.12                                        | 0.4990                 | 0.0668            | 323.12                       | 0.4986                 | 0.1060            |
| 323.12                                        | 0.7490                 | 0.0919            | 323.15                       | 0.7493                 | 0.1246            |
| 323.10                                        | 0.9991                 | 0.1134            | 323.13                       | 0.9997                 | 0.1423            |
| 323.12                                        | 2.499                  | 0.1738            | 323.10                       | 2.500                  | 0.2015            |
| 323.09                                        | 4.999                  | 0.2342            | 323.09                       | 4.999                  | 0.2342            |
| 340.35                                        | 0.0000                 | 0.0000            | 340.35                       | 0.0000                 | 0.000             |
| 343.08                                        | 0.2490                 | 0.0522            | 343.06                       | 0.2490                 | 0.0535            |
| 343.12                                        | 0.4984                 | 0.0658            | 343.11                       | 0.4982                 | 0.0850            |
| 343.09                                        | 0.7483                 | 0.0744            | 343.12                       | 0.7477                 | 0.0943            |
| 343.11                                        | 0.9995                 | 0.0818            | 343.11                       | 0.9993                 | 0.1020            |
| 343.10                                        | 2.499                  | 0.1119            | 343.13                       | 2.500                  | 0.1290            |
| 343.14                                        | 4.998                  | 0.1547            | 343.14                       | 4.998                  | 0.1547            |
| 3 <sup>rd</sup> cycle                         |                        |                   |                              |                        |                   |
| 343.11                                        | 0.0000                 | 0.0000            | 343.11                       | 0.0000                 | 0.0000            |
| 343.11                                        | 0.2494                 | 0.0496            | 343.10                       | 0.2468                 | 0.0636            |
| 343.11                                        | 0.4984                 | 0.0633            | 343.09                       | 0.4985                 | 0.0805            |
| 343.12                                        | 0.7488                 | 0.0717            | 343.11                       | 0.7480                 | 0.0888            |
| 343.11                                        | 0.9992                 | 0.0794            | 343.10                       | 0.9984                 | 0.0956            |
| 343.10                                        | 2.499                  | 0.1187            | 343.07                       | 2.500                  | 0.1235            |
| 343.08                                        | 4.999                  | 0.1503            | 343.08                       | 4.999                  | 0.1503            |
| [P <sub>4,4,4,4</sub> ][C <sub>1</sub> COO]   |                        |                   |                              |                        |                   |
| 339.45                                        | 0.0000                 | 0.0000            | 340.35                       | 0.0000                 | 0.0000            |
| 343.00                                        | 0.2484                 | 0.0516            | 343.10                       | 0.2437                 | 0.1382            |
| 343.18                                        | 0.4921                 | 0.0870            | 343.13                       | 0.5004                 | 0.1599            |
| 343.18                                        | 0.7488                 | 0.1084            | 343.13                       | 0.7496                 | 0.1651            |
| 343.01                                        | 0.9903                 | 0.1221            | 343.04                       | 0.9976                 | 0.1791            |
| 343.078                                       | 2.983                  | 0.1780            | 343.07                       | 2.998                  | 0.2057            |
| 343.07                                        | 4.993                  | 0.2199            | 343.07                       | 4.993                  | 0.2199            |
| [P <sub>4,4,4,4</sub> ][MeC <sub>3</sub> COO] |                        |                   |                              |                        |                   |
| 342.44                                        | 0.0000                 | 0.0000            | 334.52                       | 0.0000                 | 0.0000            |
| 343.11                                        | 0.2497                 | 0.0413            | 343.07                       | 0.2488                 | 0.0465            |
| 343.09                                        | 0.4984                 | 0.0754            | 343.10                       | 0.4992                 | 0.0817            |
| 343.14                                        | 0.7483                 | 0.0974            | 343.12                       | 0.7490                 | 0.1015            |
| 343.09                                        | 1.0002                 | 0.1144            | 343.10                       | 0.9991                 | 0.1214            |

| CO <sub>2</sub> - Absorption                  |                        |                   | CO <sub>2</sub> - Desorption |                        |                   |
|-----------------------------------------------|------------------------|-------------------|------------------------------|------------------------|-------------------|
| $\frac{T}{K}$                                 | $\frac{P}{\text{bar}}$ | $x_{\text{CO}_2}$ | $\frac{T}{K}$                | $\frac{P}{\text{bar}}$ | $x_{\text{CO}_2}$ |
| 336.36                                        | 2.500                  | 0.1814            | 336.44                       | 2.498                  | 0.1877            |
| 336.55                                        | 4.998                  | 0.2329            | 336.55                       | 4.998                  | 0.2329            |
| [P <sub>4,4,4,4</sub> ][c-C <sub>6</sub> COO] |                        |                   |                              |                        |                   |
| 338.21                                        | 0.0000                 | 0.0000            | 333.25                       | 0.0000                 | 0.0000            |
| 343.11                                        | 0.2501                 | 0.0335            | 336.91                       | 0.2487                 | 0.0384            |
| 343.13                                        | 0.4986                 | 0.0541            | 343.14                       | 0.4990                 | 0.0567            |
| 343.12                                        | 0.7468                 | 0.0691            | 343.09                       | 0.7483                 | 0.0714            |
| 343.11                                        | 0.9996                 | 0.0828            | 343.09                       | 0.9979                 | 0.0865            |
| 343.14                                        | 2.499                  | 0.1338            | 343.13                       | 2.499                  | 0.1355            |
| 343.11                                        | 4.998                  | 0.1800            | 343.11                       | 4.998                  | 0.1800            |
| [P <sub>4,4,4,4</sub> ][C <sub>5</sub> COO]   |                        |                   |                              |                        |                   |
| 325.87                                        | 0.0000                 | 0.0000            | 331.59                       | 0.0000                 | 0.0000            |
| 343.16                                        | 0.2495                 | 0.0406            | 343.14                       | 0.2498                 | 0.0494            |
| 343.14                                        | 0.4984                 | 0.0705            | 340.23                       | 0.4966                 | 0.0831            |
| 343.14                                        | 0.7488                 | 0.0912            | 343.15                       | 0.7490                 | 0.1030            |
| 343.16                                        | 0.9999                 | 0.1075            | 336.83                       | 0.9997                 | 0.1402            |
| 343.14                                        | 4.998                  | 0.2145            | 343.14                       | 4.998                  | 0.2145            |
| [P <sub>4,4,4,4</sub> ][C <sub>11</sub> COO]  |                        |                   |                              |                        |                   |
| 1 <sup>st</sup> cycle                         |                        |                   |                              |                        |                   |
| 330.73                                        | 0.0000                 | 0.0000            | 303.15                       | 0.0000                 | 0.0000            |
| 303.17                                        | 0.2494                 | 0.0093            | 303.15                       | 0.2488                 | 0.0202            |
| 303.13                                        | 0.4981                 | 0.0166            | 303.14                       | 0.4990                 | 0.0257            |
| 303.19                                        | 0.7486                 | 0.0244            | 303.15                       | 0.7490                 | 0.0315            |
| 303.13                                        | 0.9993                 | 0.0320            | 303.16                       | 1.0002                 | 0.0374            |
| 303.14                                        | 2.499                  | 0.0728            | 303.07                       | 2.499                  | 0.0760            |
| 303.12                                        | 4.998                  | 0.1343            | 303.12                       | 4.998                  | 0.1343            |
| 331.79                                        | 0.0000                 | 0.0000            | 331.22                       | 0.0000                 | 0.0000            |
| 343.16                                        | 0.2484                 | 0.0616            | 343.15                       | 0.2494                 | 0.0871            |
| 343.15                                        | 0.4981                 | 0.0932            | 343.16                       | 0.4981                 | 0.1118            |
| 343.16                                        | 0.7486                 | 0.1159            | 343.19                       | 0.7491                 | 0.1291            |
| 343.12                                        | 0.9982                 | 0.1341            | 343.15                       | 1.0000                 | 0.1475            |
| 343.19                                        | 2.499                  | 0.1913            | 343.14                       | 2.498                  | 0.1993            |
| 343.29                                        | 4.999                  | 0.2479            | 343.29                       | 4.999                  | 0.2479            |
| 2 <sup>nd</sup> cycle                         |                        |                   |                              |                        |                   |
| 303.13                                        | 0.0000                 | 0.0000            | 303.13                       | 0.0000                 | 0.0000            |
| 303.15                                        | 0.2492                 | 0.0089            | 303.16                       | 0.2490                 | 0.0176            |
| 303.14                                        | 0.4982                 | 0.0167            | 303.14                       | 0.4979                 | 0.0238            |
| 303.16                                        | 0.7491                 | 0.0242            | 303.15                       | 0.7488                 | 0.0298            |
| 303.16                                        | 0.9986                 | 0.0317            | 303.11                       | 0.9986                 | 0.036             |
| 303.15                                        | 2.500                  | 0.0722            | 303.14                       | 2.500                  | 0.0746            |
| 303.14                                        | 4.998                  | 0.1330            | 303.14                       | 4.998                  | 0.1330            |
| 340.35                                        | 0.0000                 | 0.0000            | 340.35                       | 0.0000                 | 0.0000            |
| 343.12                                        | 0.2491                 | 0.0634            | 343.11                       | 0.2491                 | 0.0691            |
| 343.11                                        | 0.4979                 | 0.0914            | 343.11                       | 0.4981                 | 0.0955            |

| CO <sub>2</sub> - Absorption                                |                        |                   | CO <sub>2</sub> - Desorption |                        |                   |
|-------------------------------------------------------------|------------------------|-------------------|------------------------------|------------------------|-------------------|
| $\frac{T}{K}$                                               | $\frac{P}{\text{bar}}$ | $x_{\text{CO}_2}$ | $\frac{T}{K}$                | $\frac{P}{\text{bar}}$ | $x_{\text{CO}_2}$ |
| 343.12                                                      | 0.7486                 | 0.1088            | 343.18                       | 0.7479                 | 0.1167            |
| 343.09                                                      | 0.9984                 | 0.1245            | 336.92                       | 0.9996                 | 0.1418            |
| 343.11                                                      | 2.499                  | 0.1854            | 343.11                       | 2.499                  | 0.1873            |
| 343.09                                                      | 4.998                  | 0.2362            | 343.09                       | 4.998                  | 0.2362            |
| [P <sub>6,6,6,14</sub> ][C <sub>11</sub> COO]               |                        |                   |                              |                        |                   |
| 299.87                                                      | 0.0000                 | 0.0000            | 303.16                       | 0.0000                 | 0.0000            |
| 303.15                                                      | 0.2492                 | 0.0803            | 303.14                       | 0.2494                 | 0.0938            |
| 303.14                                                      | 0.4993                 | 0.0924            | 303.15                       | 0.4982                 | 0.1111            |
| 303.14                                                      | 0.7488                 | 0.1050            | 303.15                       | 0.7483                 | 0.1214            |
| 303.15                                                      | 0.9989                 | 0.1162            | 303.18                       | 0.9993                 | 0.1296            |
| 303.14                                                      | 2.500                  | 0.1665            | 303.15                       | 2.498                  | 0.1734            |
| 303.15                                                      | 4.999                  | 0.2349            | 303.15                       | 4.999                  | 0.2349            |
| 336.95                                                      | 0.0000                 | 0.0000            | 327.27                       | 0.0000                 | 0.0000            |
| 343.12                                                      | 0.2481                 | 0.0766            | 343.12                       | 0.2491                 | 0.0787            |
| 343.11                                                      | 0.4938                 | 0.0992            | 343.13                       | 0.4970                 | 0.1062            |
| 337.43                                                      | 0.7475                 | 0.1175            | 343.12                       | 0.7487                 | 0.1189            |
| 343.11                                                      | 0.9991                 | 0.1305            | 343.10                       | 0.9992                 | 0.1346            |
| 343.12                                                      | 2.499                  | 0.1859            | 343.11                       | 2.499                  | 0.1894            |
| 343.08                                                      | 4.999                  | 0.2435            | 343.08                       | 4.999                  | 0.2435            |
| [P <sub>4,4,4,4</sub> ][Me <sub>4</sub> C <sub>4</sub> COO] |                        |                   |                              |                        |                   |
| 1 <sup>st</sup> cycle                                       |                        |                   |                              |                        |                   |
| 303.21                                                      | 0.0000                 | 0.0000            | 303.21                       | 0.0000                 | 0.0000            |
| 303.15                                                      | 0.2497                 | 0.3074            | 303.19                       | 0.2494                 | 0.4045            |
| 303.12                                                      | 0.4984                 | 0.4015            | 303.17                       | 0.4979                 | 0.4341            |
| 303.16                                                      | 0.7493                 | 0.4419            | 303.14                       | 0.7494                 | 0.4452            |
| 303.16                                                      | 0.9991                 | 0.4578            | 303.12                       | 0.9988                 | 0.4522            |
| 303.16                                                      | 2.498                  | 0.4897            | 303.13                       | 2.498                  | 0.4904            |
| 303.16                                                      | 4.999                  | 0.5129            | 303.16                       | 4.999                  | 0.5129            |
| 323.12                                                      | 0.0000                 | 0.0000            | 323.12                       | 0.0000                 | 0.0000            |
| 323.10                                                      | 0.2488                 | 0.1911            | 323.11                       | 0.2497                 | 0.2382            |
| 323.11                                                      | 0.4985                 | 0.2979            | 323.11                       | 0.4971                 | 0.2917            |
| 323.12                                                      | 0.7487                 | 0.3448            | 323.12                       | 0.7490                 | 0.3120            |
| 323.11                                                      | 0.9991                 | 0.3602            | 323.13                       | 0.9995                 | 0.3236            |
| 323.09                                                      | 2.498                  | 0.4176            | 323.11                       | 2.501                  | 0.4019            |
| 323.14                                                      | 4.993                  | 0.4555            | 323.14                       | 4.993                  | 0.4555            |
| 343.03                                                      | 0.0000                 | 0.0000            | 343.03                       | 0.0000                 | 0.0000            |
| 343.13                                                      | 0.2491                 | 0.0788            | 343.08                       | 0.2490                 | 0.0720            |
| 343.12                                                      | 0.4993                 | 0.1220            | 343.13                       | 0.4988                 | 0.1107            |
| 343.10                                                      | 0.7476                 | 0.1498            | 343.20                       | 0.7459                 | 0.1301            |
| 343.08                                                      | 0.9989                 | 0.1670            | 343.10                       | 0.9985                 | 0.1396            |
| 343.07                                                      | 2.497                  | 0.2401            | 343.04                       | 2.498                  | 0.2252            |
| 343.16                                                      | 4.996                  | 0.2871            | 343.16                       | 4.996                  | 0.2871            |
| 2 <sup>nd</sup> cycle                                       |                        |                   |                              |                        |                   |
| 341.60                                                      | 0.0000                 | 0.0000            | 341.60                       | 0.0000                 | 0.0000            |
| 343.12                                                      | 0.2491                 | 0.0915            | 343.10                       | 0.2497                 | 0.0962            |

| CO <sub>2</sub> - Absorption                                 |                        |                   | CO <sub>2</sub> - Desorption |                        |                   |
|--------------------------------------------------------------|------------------------|-------------------|------------------------------|------------------------|-------------------|
| $\frac{T}{K}$                                                | $\frac{P}{\text{bar}}$ | $x_{\text{CO}_2}$ | $\frac{T}{K}$                | $\frac{P}{\text{bar}}$ | $x_{\text{CO}_2}$ |
| 343.12                                                       | 0.4988                 | 0.1270            | 343.11                       | 0.4984                 | 0.1283            |
| 343.09                                                       | 0.7480                 | 0.1504            | 343.12                       | 0.7490                 | 0.1521            |
| 343.14                                                       | 0.9995                 | 0.1695            | 343.14                       | 0.9978                 | 0.1706            |
| 343.14                                                       | 2.499                  | 0.2390            | 336.54                       | 2.499                  | 0.2624            |
| 343.09                                                       | 4.998                  | 0.2833            | 343.09                       | 4.998                  | 0.2833            |
| [P <sub>6,6,6,14</sub> ][Me <sub>4</sub> C <sub>4</sub> COO] |                        |                   |                              |                        |                   |
| 1 <sup>st</sup> cycle                                        |                        |                   |                              |                        |                   |
| 303.52                                                       | 0.0000                 | 0.0000            | 303.52                       | 0.0000                 | 0.0000            |
| 303.11                                                       | 0.2491                 | 0.0721            | 303.15                       | 0.2498                 | 0.0829            |
| 303.18                                                       | 0.4984                 | 0.0882            | 303.17                       | 0.4982                 | 0.0993            |
| 303.15                                                       | 0.7487                 | 0.1009            | 303.14                       | 0.7477                 | 0.1101            |
| 303.15                                                       | 0.9995                 | 0.1118            | 303.14                       | 0.9989                 | 0.1188            |
| 303.15                                                       | 2.500                  | 0.1586            | 303.15                       | 2.498                  | 0.1617            |
| 303.15                                                       | 4.999                  | 0.2202            | 303.15                       | 4.999                  | 0.2202            |
| 318.54                                                       | 0.0000                 | 0.0000            | 318.54                       | 0.0000                 | 0.0000            |
| 323.16                                                       | 0.2985                 | 0.1011            | 323.06                       | 0.4975                 | 0.1243            |
| 323.17                                                       | 0.7490                 | 0.1127            | 323.17                       | 0.7469                 | 0.1339            |
| 323.18                                                       | 0.9989                 | 0.1237            | 323.16                       | 1.0003                 | 0.1419            |
| 323.15                                                       | 2.499                  | 0.1695            | 323.15                       | 2.499                  | 0.1817            |
| 323.16                                                       | 4.999                  | 0.2268            | 323.16                       | 4.999                  | 0.2268            |
| 334.22                                                       | 0.0000                 | 0.0000            | 334.22                       | 0.0000                 | 0.0000            |
| 342.65                                                       | 0.2504                 | 0.0833            | 343.10                       | 0.2492                 | 0.0851            |
| 343.35                                                       | 0.4979                 | 0.1078            | 343.08                       | 0.4979                 | 0.1088            |
| 343.08                                                       | 0.7486                 | 0.1232            | 343.12                       | 0.7490                 | 0.1245            |
| 343.18                                                       | 0.9993                 | 0.1363            | 343.13                       | 0.9988                 | 0.1389            |
| 342.93                                                       | 2.499                  | 0.1966            | 343.14                       | 2.500                  | 0.2139            |
| 342.99                                                       | 4.997                  | 0.2528            | 342.99                       | 4.997                  | 0.2528            |
| 2 <sup>nd</sup> cycle                                        |                        |                   |                              |                        |                   |
| 303.14                                                       | 0.0000                 | 0.0000            | 303.14                       | 0.0000                 | 0.0000            |
| 303.14                                                       | 0.2488                 | 0.0735            | 303.14                       | 0.2491                 | 0.0788            |
| 303.14                                                       | 0.4975                 | 0.0931            | 303.15                       | 0.4992                 | 0.0976            |
| 303.14                                                       | 0.7476                 | 0.1073            | 303.15                       | 0.7488                 | 0.1110            |
| 303.13                                                       | 0.9992                 | 0.1190            | 303.18                       | 0.9989                 | 0.1218            |
| 303.15                                                       | 2.499                  | 0.1684            | 303.15                       | 2.500                  | 0.1696            |
| 303.15                                                       | 4.999                  | 0.2292            | 303.15                       | 4.999                  | 0.2292            |
| 333.39                                                       | 0.0000                 | 0.0000            | 333.39                       | 0.0000                 | 0.0000            |
| 343.14                                                       | 0.2494                 | 0.1200            | 343.14                       | 0.2490                 | 0.1203            |
| 343.07                                                       | 0.4979                 | 0.1420            | 343.20                       | 0.4971                 | 0.1414            |
| 343.20                                                       | 0.7481                 | 0.1568            | 343.24                       | 0.7487                 | 0.1566            |
| 343.23                                                       | 0.9986                 | 0.1696            | 343.08                       | 0.9999                 | 0.1695            |
| 343.16                                                       | 2.500                  | 0.2223            | 343.18                       | 2.500                  | 0.2289            |
| 343.13                                                       | 4.998                  | 0.2761            | 343.13                       | 4.998                  | 0.2761            |

### 3 CO<sub>2</sub> absorption model

$$K_H = \lim_{x_{\text{CO}_2} \rightarrow 0} \frac{\phi_{\text{CO}_2} P}{x_{\text{CO}_2}} \approx \frac{P}{x_{\text{CO}_2}} \quad (\text{S2})$$

| Compound                                                           | $n_i$                                      |                                                                                                                                                                                     |
|--------------------------------------------------------------------|--------------------------------------------|-------------------------------------------------------------------------------------------------------------------------------------------------------------------------------------|
| CO <sub>2</sub> (sol)                                              | $n_{\text{CO}_2}(1 - \xi)$                 | $K_{\text{eq},1:2} = \frac{\gamma_{\text{zwi}}\gamma_{\text{compl}}}{\gamma_{\text{CO}_2}\gamma_{\text{IL}}} \frac{x_{\text{zwi}}x_{\text{compl}}}{x_{\text{CO}_2}x_{\text{IL}}^2}$ |
| [P <sub>4,4,4,4</sub> ][RCOO]                                      | $n_{\text{IL}} - 2n_{\text{CO}_2}\xi$      |                                                                                                                                                                                     |
| [P <sub>4,4,4,4</sub> <sup>+</sup> -CO <sub>2</sub> <sup>-</sup> ] | $n_{\text{CO}_2}\xi$                       | $K_{\text{eq},1:2} \approx \frac{x_{\text{zwi}}x_{\text{compl}}}{x_{\text{CO}_2}x_{\text{IL}}^2}$                                                                                   |
| [P <sub>4,4,4,4</sub> ][RCOO] - - HOOCR                            | $n_{\text{CO}_2}\xi$                       |                                                                                                                                                                                     |
| Total                                                              | $n_{\text{CO}_2}(1 - \xi) + n_{\text{IL}}$ | $K_{\text{eq},1:2} = \frac{n_{\text{CO}_2}\xi^2[n_{\text{CO}_2}(1 - \xi) + n_{\text{IL}}]}{(1 - \xi)(n_{\text{IL}} - 2n_{\text{CO}_2}\xi)^2}$                                       |

(S3)

where  $\gamma_{\text{zwi}}$ ,  $\gamma_{\text{compl}}$ ,  $\gamma_{\text{CO}_2}$ , and  $\gamma_{\text{IL}}$  represent the activity coefficients, while  $x_{\text{zwi}}$ ,  $x_{\text{compl}}$ ,  $x_{\text{CO}_2}$ , and  $x_{\text{IL}}$  denote the mole fractions of the zwitterion, complex, dissolved CO<sub>2</sub>, and neat IL in Equation S3, respectively. In Equation S2,  $\phi_{\text{CO}_2}$  corresponds to the fugacity coefficient of CO<sub>2</sub>, and P represents the equilibrium pressure of the system. Ideal solutions are assumed, implying that the activity coefficients are concentration-independent and are thus incorporated into the  $K_{\text{eq}}$  value. is considered ideal ( $\phi_{\text{CO}_2} \approx 1$ ). The  $K_{\text{eq}}$  equation is reformulated as a function of the compound amounts, taking into account the extent of reaction  $\xi$ .

Table S13 – Henry’s law constant ( $K_H$ ) and the equilibrium constant ( $K_{\text{eq}}$ ) obtained for various ILs by fitting the data in Table S12 of the successive cycles at either 303 K, 323 K or 343 K.

| Sample                                                       | Cycle           | $\frac{T}{\text{K}}$ | $K_{\text{eq}}$ | $\frac{K_H}{\text{bar}}$ |
|--------------------------------------------------------------|-----------------|----------------------|-----------------|--------------------------|
| [P <sub>4,4,4,4</sub> ][PhC <sub>1</sub> COO]                | 2 <sup>nd</sup> | 323                  | 0.8 ± 0.2       | 45 ± 4                   |
|                                                              | 2 <sup>nd</sup> | 343                  | 1.2 ± 0.2       | 139 ± 29                 |
|                                                              | 3 <sup>rd</sup> | 343                  | 1.2 ± 0.3       | 144 ± 35                 |
| [P <sub>4,4,4,4</sub> ][C <sub>11</sub> COO]                 | 2 <sup>nd</sup> | 303                  |                 | 36.4 ± 0.8               |
|                                                              | 2 <sup>nd</sup> | 343                  | 1.8 ± 0.3       | 59 ± 4                   |
| [P <sub>4,4,4,4</sub> ][Me <sub>4</sub> C <sub>4</sub> COO]  | 2 <sup>nd</sup> | 343                  | 5 ± 1           | 53 ± 6                   |
| [P <sub>6,6,6,14</sub> ][Me <sub>4</sub> C <sub>4</sub> COO] | 2 <sup>nd</sup> | 303                  | 1.3 ± 0.2       | 58 ± 3                   |
|                                                              | 2 <sup>nd</sup> | 343                  | 5.3 ± 0.5       | 58 ± 2                   |

## 4 NMR before and after CO<sub>2</sub> absorption

### 4.1 [P<sub>4,4,4,4</sub>][2-CIPyCOO]

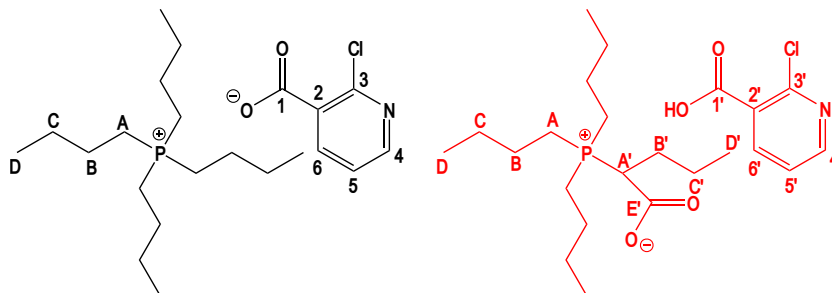

Figure S12 – Chemical structure of the [P<sub>4,4,4,4</sub>][2-CIPyCOO] (left) before and (right) after CO<sub>2</sub> absorption.

**Tetrabutylphosphonium 2-chloropyridine-3-carboxylate [P<sub>4,4,4,4</sub>][2-CIPyCOO] after CO<sub>2</sub> absorption:** <sup>1</sup>H NMR (400 MHz, C<sub>6</sub>D<sub>6</sub>, 343 K) δ ppm: 0.73 (m, 12H, D); 1.25 (m, 8H, C); 1.41 (m, 8H, B); 2.35 (m, 8H, A); 7.14 (t, 1H, 5); 7.63 (d, 1H, 6); 8.02 (m, 1H, 4). <sup>13</sup>C NMR (100 MHz, C<sub>6</sub>D<sub>6</sub>, 343 K) δ ppm: 12.41 (4C, D); 17.57 (4C, A); 22.71 (7C, B); 22.89 (4C, C); 121.54 (1C, 5); 136.33 (1C, 6); 139.72 (1C, 2); 145.58 (1C, 4); 146.45 (1C, 3); 166.03 (1C, 1). <sup>31</sup>P NMR (161 MHz, C<sub>6</sub>D<sub>6</sub>, 343 K) δ ppm: 33.65 (1P, P((CH<sub>2</sub>)<sub>3</sub>CH<sub>3</sub>)<sub>4</sub>).

### 4.2 [P<sub>4,4,4,4</sub>][2-CIPhC<sub>1</sub>OHCOO]

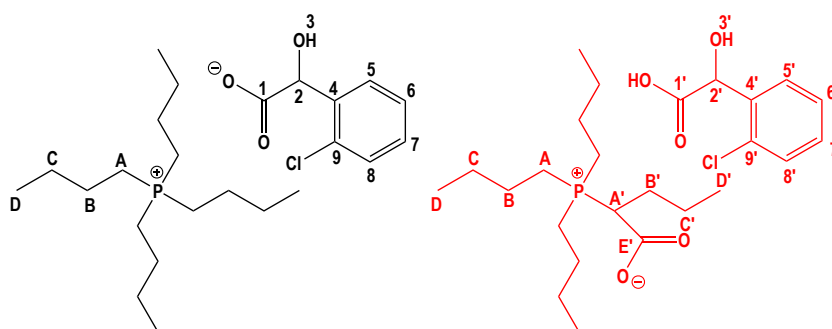

Figure S13 – Chemical structure of the [P<sub>4,4,4,4</sub>][2-CIPhC<sub>1</sub>OHCOO] (left) before and (right) after CO<sub>2</sub> absorption.

**Tetrabutylphosphonium 2-(2-chlorophenylacetate)-2-hydroxyacetate [P<sub>4,4,4,4</sub>][2-CIPhC<sub>1</sub>OHCOO] after CO<sub>2</sub> absorption:** <sup>1</sup>H NMR (400 MHz, C<sub>6</sub>D<sub>6</sub>, 343 K) δ ppm: 0.73 (t, 12H, <sup>3</sup>J<sub>HH</sub> = 6.8 Hz, D); 1.22 (m, 16H, B+C); 2.05 (m, 8H, A); 4.81 (s, 1H, 2); 5.56 (s, 1H, 3); 6.96 (m, 2H, 7+8); 7.06 (m, 1H,

5); 7.26 (m, 1H, 6).  $^{13}\text{C}$  NMR (100 MHz,  $\text{C}_6\text{D}_6$ , 343 K)  $\delta$  ppm: 12.33 (4C, D); 17.35 (4C, A); 22.51 (4C, B); 22.80 (4C, C); 70.11 (1C, 2); 125.24 (1C, 7); 126.28 (1C, 8); 127.55 (1C, 6); 127.76 (1C, 5); 132.79 (1C, 4); 142.60 (1C, 9); 171.90 (1C, 1).  $^{31}\text{P}$  NMR (161 MHz,  $\text{C}_6\text{D}_6$ , 343 K)  $\delta$  ppm: 33.22 (1P,  $\text{P}((\text{CH}_2)_3\text{CH}_3)_4$ ). 3

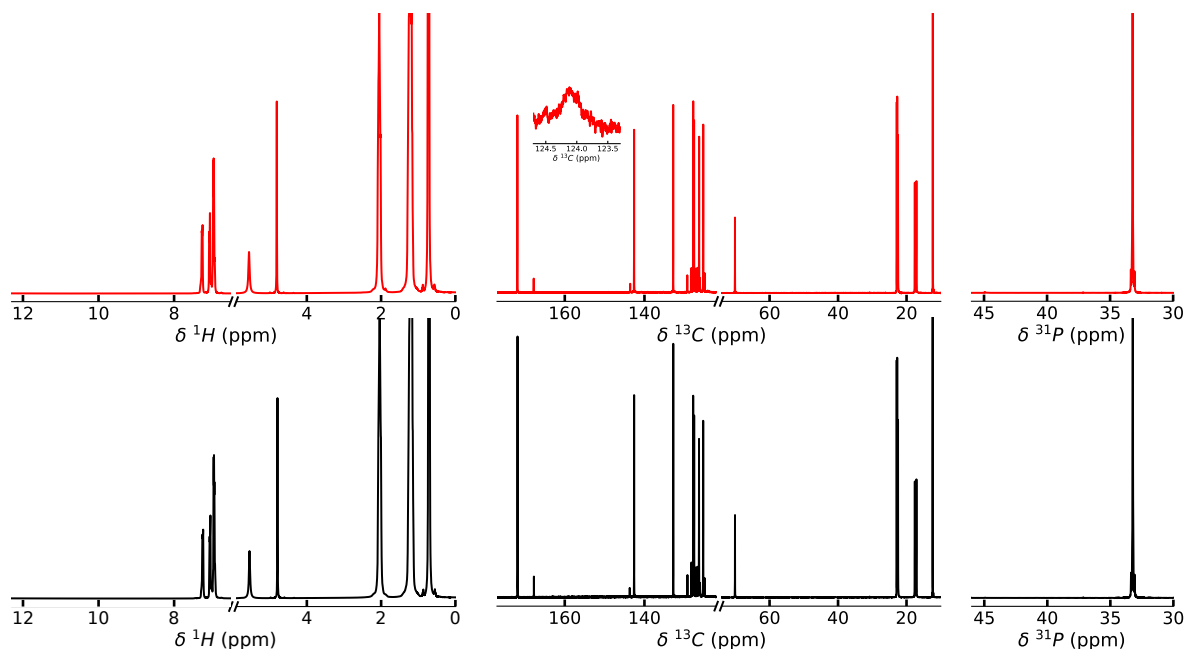

Figure S14 – (Left)  $^1\text{H}$ , (middle)  $^{13}\text{C}$  and (right)  $^{31}\text{P}$  NMR spectra of  $[\text{P}_{4,4,4,4}][2\text{-CIPhC}_1\text{OHCOO}]$  — before and — after  $\text{CO}_2$  absorption at 343 K.

### 4.3 $[\text{P}_{4,4,4,4}][\text{PhSC}_1\text{COO}]$

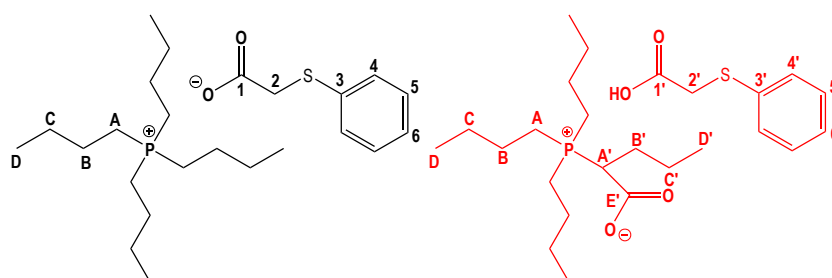

Figure S15 – Chemical structure of the  $[\text{P}_{4,4,4,4}][\text{PhSC}_1\text{COO}]$  (left) before and (right) after  $\text{CO}_2$  absorption.

**Tetrabutylphosphonium (thiophenyl)acetate  $[\text{P}_{4,4,4,4}][\text{PhSC}_1\text{COO}]$  after  $\text{CO}_2$  absorption:**  $^1\text{H}$  NMR (400 MHz,  $\text{C}_6\text{D}_6$ , 343 K)  $\delta$  ppm: 0.77 (t, 12H,  $^3J_{\text{HH}} = 7.8$  Hz, D); 1.30 (m, 8H, C); 1.38 (m, 8H, B); 2.34 (m, 8H, A); 3.36 (s, 1H, 2); 6.87 (t, 1H,  $^3J_{\text{HH}} = 7.2$  Hz, 6); 7.02 (m, 2H,  $^3J_{\text{HH}} = 7.5$  Hz, 5); 7.15 (d, 2H,  $^3J_{\text{HH}} = 7.1$  Hz, 4).  $^{13}\text{C}$  NMR (100 MHz,  $\text{C}_6\text{D}_6$ , 343 K)  $\delta$  ppm: 13.79 (4C, D); 18.88 (4C, A); 24.11,



24.29 (8C, B+C); 41.38 (1C, 2); 124.35 (1C, 6); 127.24 (2C, 4); 128.78 (2C, 5); 141.42 (1C, 3); 168.77 (1C, 1).  $^{31}\text{P}$  NMR (161 MHz,  $\text{C}_6\text{D}_6$ , 343 K)  $\delta$  ppm: 33.47 (1P,  $\text{P}((\text{CH}_2)_3\text{CH}_3)_4$ ).

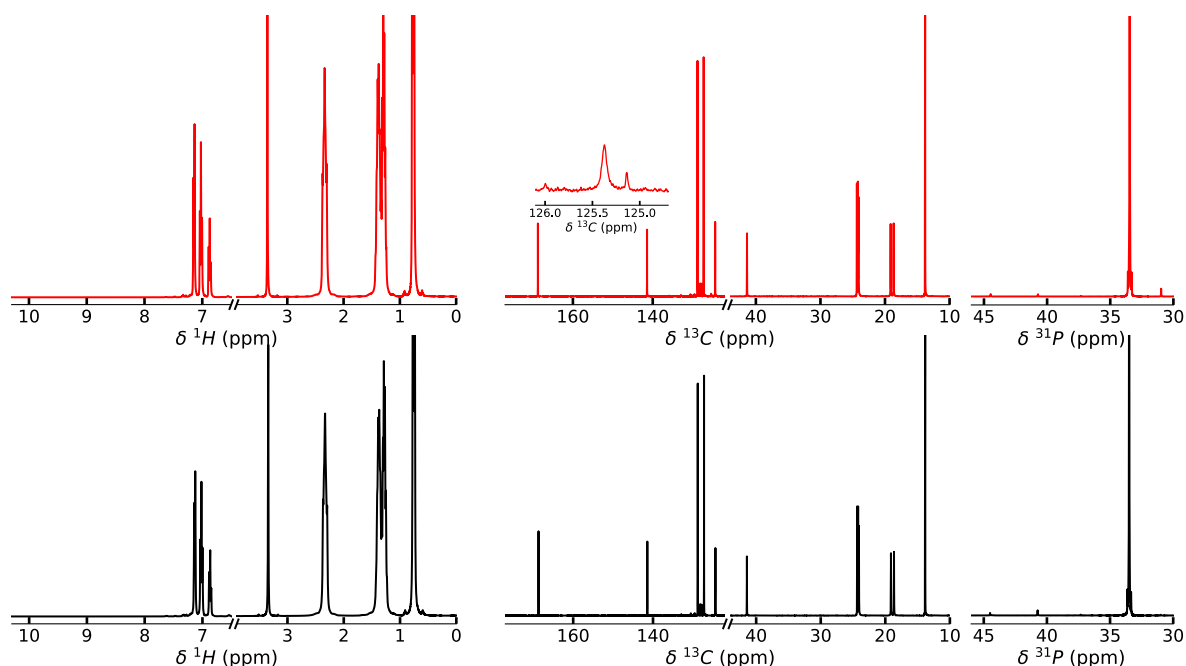

Figure S16 – (Left)  $^1\text{H}$ , (middle)  $^{13}\text{C}$  and (right)  $^{31}\text{P}$  NMR spectra of  $[\text{P}_{4,4,4,4}][\text{PhSC}_1\text{COO}]$  — before and — after  $\text{CO}_2$  absorption at 343 K.

#### 4.4 $[\text{P}_{4,4,4,4}][\text{PhC}_1\text{COO}]$

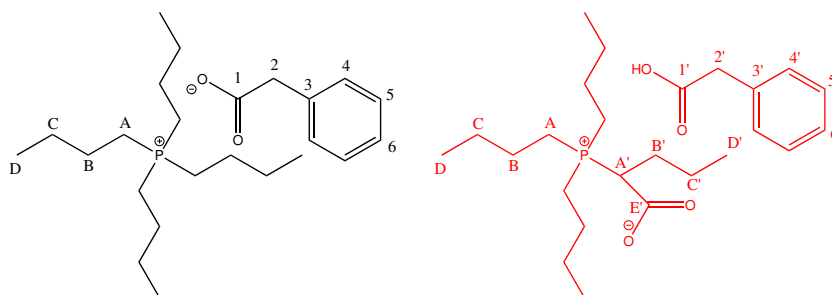

Figure S17 – Chemical structure of the  $[\text{P}_{4,4,4,4}][\text{PhC}_1\text{COO}]$  (left) before and (right) after  $\text{CO}_2$  absorption.

**Tetrabutylphosphonium phenylacetate  $[\text{P}_{4,4,4,4}][\text{PhC}_1\text{COO}]$  after  $\text{CO}_2$  absorption:**  $^1\text{H}$  NMR (400 MHz,  $\text{DMSO-}d_6$ , 343 K)  $\delta$  ppm: 0.97 (t, 12H,  $^3J_{\text{HH}} = 6.8$  Hz, D+D'); 1.40-1.56 (m, 14H, B+B'+C+C'); 1.96 (m, 2H, B'); 2.26 (m, 6H, A); 2.35 (m, 8H, A); 2.87 (t, 1H,  $^3J_{\text{HH}} = 11.8$  Hz, A'); 3.48 (s, 2H, 2'); 7.14 (t, 1H,  $^3J_{\text{HH}} = 7.3$  Hz, 6'); 7.23 (t, 2H,  $^3J_{\text{HH}} = 7.4$  Hz, 5'); 7.37 (d, 2H,  $^3J_{\text{HH}} = 7.5$  Hz, 4'); 14.12 (1H, RCOOH).  $^{13}\text{C}$  NMR (100 MHz,  $\text{DMSO-}d_6$ , 343 K)  $\delta$  ppm: 12.28 (3C, D); 12.31 (4C,

D); 12.69 (1C, D'); 17.35 (4C, A); 18.10 (3C, A); 21.33 (1C, C'); 22.41-23.10 (7C, B+C+C'); 28.38 (1C, B'); 40.98 (1C, A'); 44.74 (1C, 2'); 124.09 (1C, 6'); 126.57 (2C, 5'); 128.46 (2C, 4'); 138.97 (1C, 3'); 165.36 (1C, E'); 172.49 (1C, 1'). <sup>31</sup>P NMR (161 MHz, DMSO-*d*<sub>6</sub>, 343 K) δ ppm: 31.25 (1P, P(CHCO<sub>2</sub>(CH<sub>2</sub>)<sub>2</sub>CH<sub>3</sub>)((CH<sub>2</sub>)<sub>3</sub>CH<sub>3</sub>)<sub>3</sub>); 33.57 (1P, P((CH<sub>2</sub>)<sub>3</sub>CH<sub>3</sub>)<sub>4</sub>).

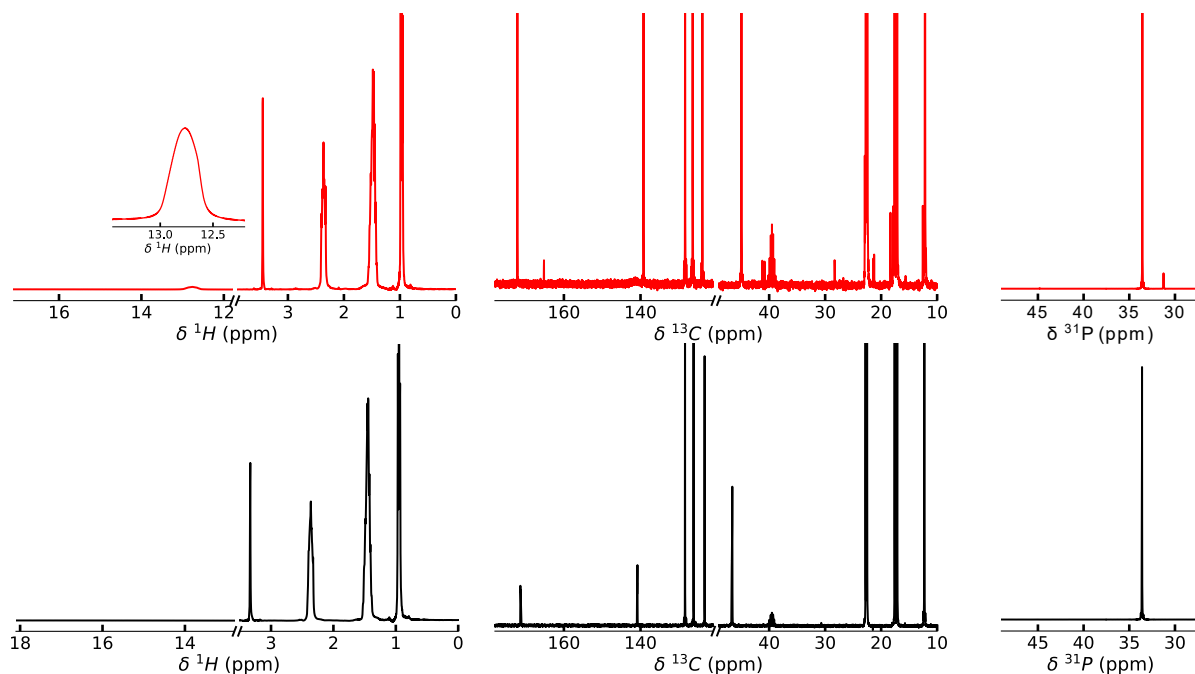

Figure S18 – (Left) <sup>1</sup>H, (middle) <sup>13</sup>C and (right) <sup>31</sup>P NMR spectra of [P<sub>4,4,4,4</sub>][PhC<sub>1</sub>COO] — before and — after CO<sub>2</sub> absorption at 343 K.

#### 4.5 [P<sub>4,4,4,4</sub>][C<sub>1</sub>COO]

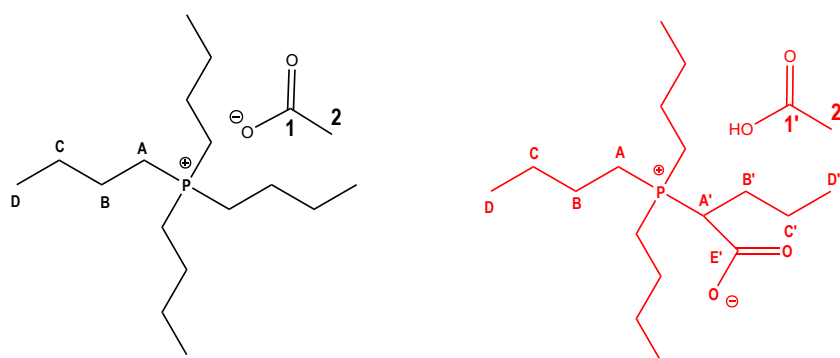

Figure S19 – Chemical structure of the [P<sub>4,4,4,4</sub>][C<sub>1</sub>COO] (left) before and (right) after CO<sub>2</sub> absorption.

**Tetrabutylphosphonium acetate [P<sub>4,4,4,4</sub>][C<sub>1</sub>COO] after CO<sub>2</sub> absorption:** <sup>1</sup>H NMR (400 MHz, C<sub>6</sub>D<sub>6</sub>, 343 K) δ ppm: 0.99 (t, 12H, <sup>3</sup>J<sub>HH</sub> = 6.9 Hz, D + D'); 1.53 (m, 8H, C + C'); 1.64 (m, 8H, B + B'); 1.82

(m, 2H, 2'); 2.42 (m, 6H, A); 2.54 (m, 8H, A); 2.87 (t, 1H,  $^3J_{\text{HH}} = 11.1$  Hz, A'); 15.86 (1H, RCOOH).  
 $^{13}\text{C}$  NMR (100 MHz,  $\text{C}_6\text{D}_6$ , 343 K)  $\delta$  ppm: 13.71 (4C, D); 14.10 (1C, D'); 18.91 (4C, A); 19.60 (3C, A); 24.11 (8C, B+B'); 24.27 (8C, C+C'); 24.42 (1C, 2'); 42.64 (1C, A'); 166.82 (1C, E'); 173.68 (1C, 1').  
 $^{31}\text{P}$  NMR (161 MHz,  $\text{C}_6\text{D}_6$ , 343 K)  $\delta$  ppm: 31.18 (1P,  $\text{P}(\text{CHCO}_2(\text{CH}_2)_2\text{CH}_3)((\text{CH}_2)_3\text{CH}_3)_3$ ); 33.66 (1P,  $\text{P}((\text{CH}_2)_3\text{CH}_3)_4$ ).

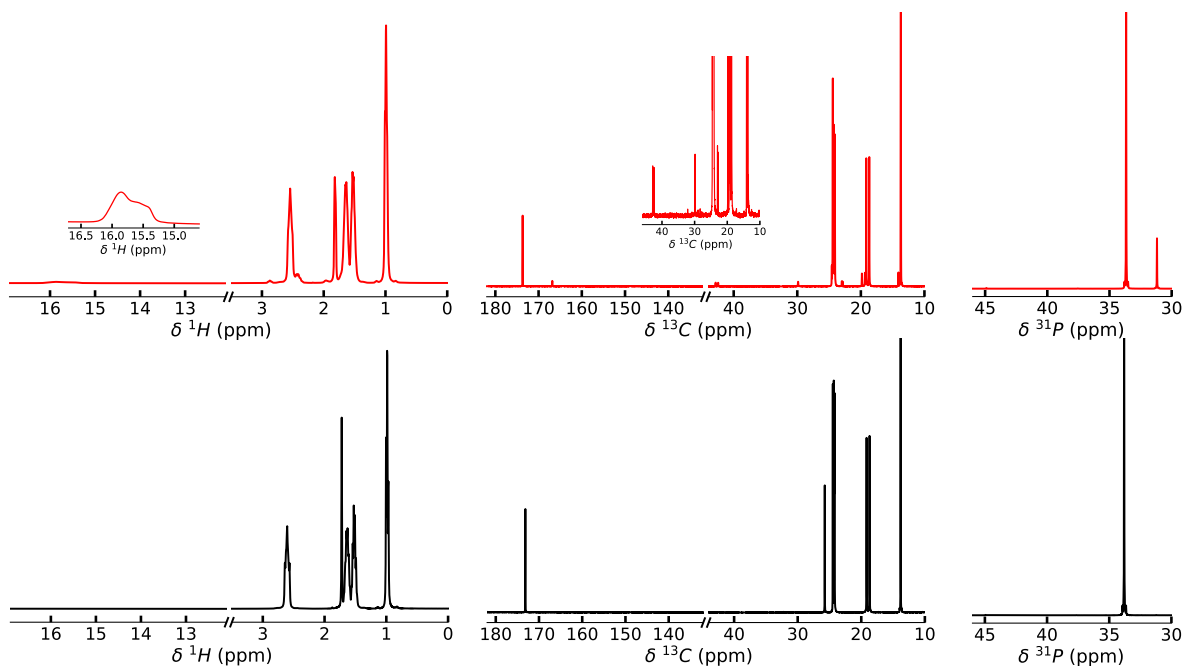

Figure S20 – (Left)  $^1\text{H}$ , (middle)  $^{13}\text{C}$  and (right)  $^{31}\text{P}$  NMR spectra of  $[\text{P}_{4,4,4,4}][\text{C}_1\text{COO}]$  — before and — after  $\text{CO}_2$  absorption at 343 K.

#### 4.6 $[\text{P}_{4,4,4,4}][\text{MeC}_3\text{COO}]$

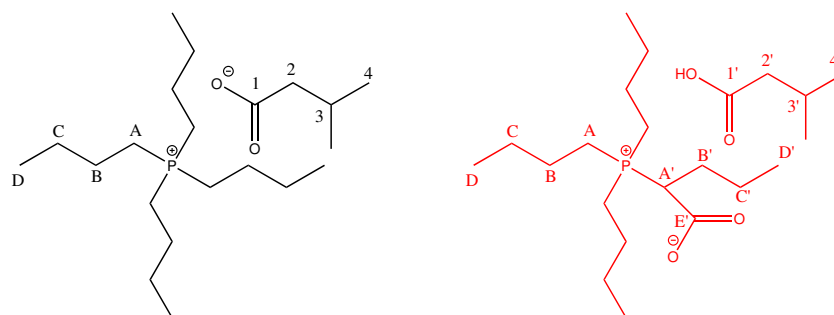

Figure S21 – Chemical structure of the  $[\text{P}_{4,4,4,4}][\text{MeC}_3\text{COO}]$  (left) before and (right) after  $\text{CO}_2$  absorption.

**Tetrabutylphosphonium isovalerate  $[\text{P}_{4,4,4,4}][\text{MeC}_3\text{COO}]$  after  $\text{CO}_2$  absorption:**  $^1\text{H}$  NMR (400 MHz,  $\text{C}_6\text{D}_6$ , 343 K)  $\delta$  ppm: 0.94 (d, 6H,  $^3J_{\text{HH}} = 6.4$  Hz, 4'); 0.97 (t, 12H,  $^3J_{\text{HH}} = 7.3$  Hz, D + D'); 1.51 (m,

8H, C + C'); 1.62 (m, 8H, B + B'); 1.99 (m, 2H, 2'); 2.05 (m, 1H, 3'); 2.44 (m, 6H, A); 2.57 (m, 8H, A); 2.85 (t, 1H,  $^3J_{\text{HH}} = 11.7$  Hz, A'); 17.52 (1H, RCOOH).  $^{13}\text{C}$  NMR (100 MHz,  $\text{C}_6\text{D}_6$ , 343 K)  $\delta$  ppm: 13.64 (3C, D); 13.68 (4C, D); 14.06 (1C, D'); 19.19 (4C, A); 19.86 (3C, A); 23.27 (1C, C'); 23.44 (2C, 4'); 24.18-24.66 (7C, B+C+C'); 26.58 (1C, 3'); 29.97 (1C, B'); 42.74 (1C, A'); 48.03 (1C, 2'); 166.68 (1C, E'); 175.42 (1C, 1').  $^{31}\text{P}$  NMR (161 MHz,  $\text{C}_6\text{D}_6$ , 343 K)  $\delta$  ppm: 31.23 (1P,  $\text{P}(\text{CHCO}_2(\text{CH}_2)_2\text{CH}_3)((\text{CH}_2)_3\text{CH}_3)_3$ ); 33.75 (1P,  $\text{P}((\text{CH}_2)_3\text{CH}_3)_4$ ).

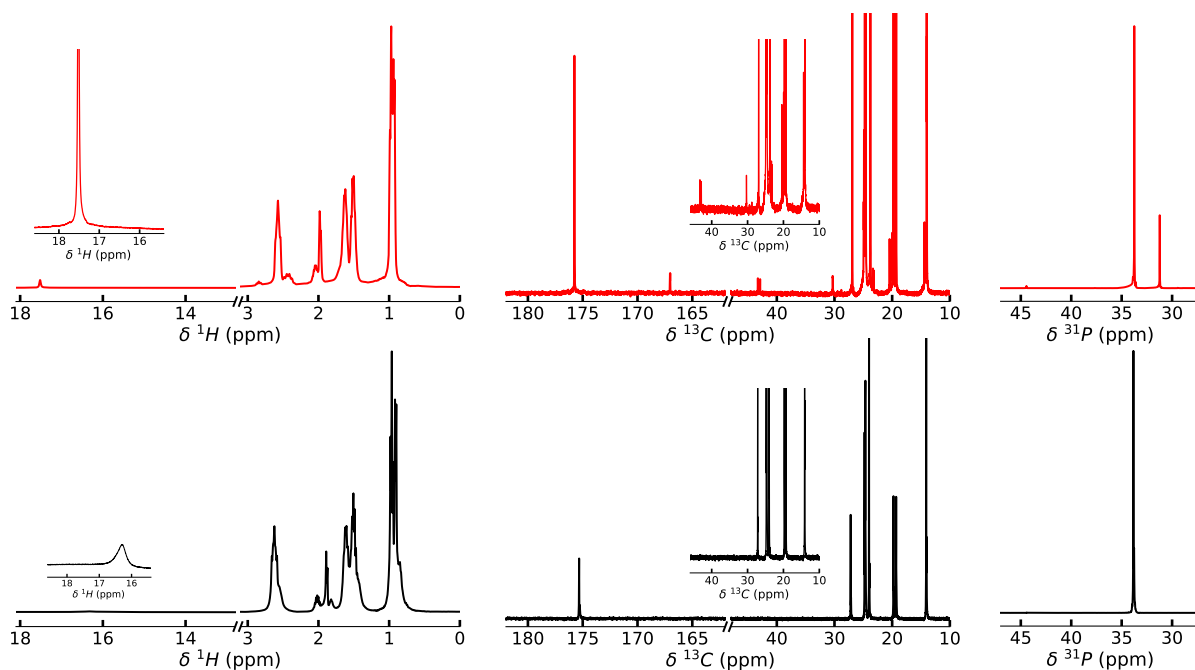

Figure S22 – (Left)  $^1\text{H}$ , (middle)  $^{13}\text{C}$  and (right)  $^{31}\text{P}$  NMR spectra of  $[\text{P}_{4,4,4,4}][\text{MeC}_3\text{COO}]$  — before and — after  $\text{CO}_2$  absorption at 343 K.

#### 4.7 $[\text{P}_{4,4,4,4}][\text{c-C}_6\text{COO}]$

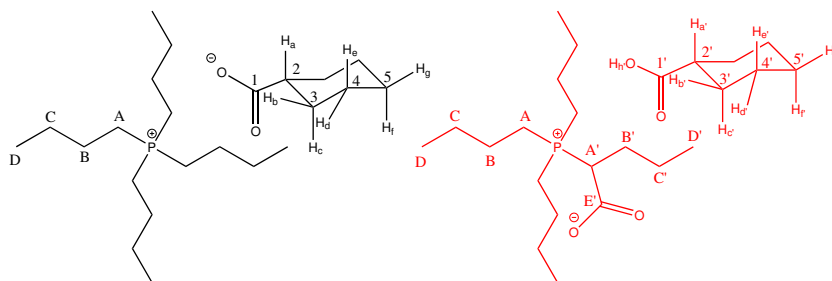

Figure S23 – Chemical structure of the  $[\text{P}_{4,4,4,4}][\text{c-C}_6\text{COO}]$  (left) before and (right) after  $\text{CO}_2$  absorption.

**Tetrabutylphosphonium cyclohexanecarboxylate  $[\text{P}_{4,4,4,4}][\text{c-C}_6\text{COO}]$  after  $\text{CO}_2$  absorption:**  $^1\text{H}$  NMR (400 MHz,  $\text{C}_6\text{D}_6$ , 343 K)  $\delta$  ppm: 0.94 (m, 12H, D+D'); 1.20 (m, 1H, 5',  $\text{H}_{\text{f}}$ ); 1.24 (m, 2H, 4',

$H_{e'}$ ); 1.38 (m, 2H, 5',  $H_{e'}$ ); 1.48 (m, 8H, C+C'); 1.57 (m, 1H, 5',  $H_{g'}$ ); 1.58 (m, 8H, B+B'); 1.66 (m, 2H, 4',  $H_{d'}$ ); 1.82 (m, 2H, 3',  $H_{b'}$ ); 2.02 (m, 1H, 2',  $H_{a'}$ ); 2.55 (m, 6H, A); 2.81 (t, 1H,  $^3J_{HH} = 11.2$  Hz, A'); 16.04 (1H, RCOOH).  $^{13}\text{C}$  NMR (100 MHz,  $\text{C}_6\text{D}_6$ , 343 K)  $\delta$  ppm: 13.58 (3C, D); 13.63 (4C, D); 13.97 (1C, D'); 19.17 (4C, A); 19.81 (3C, A); 24.04-24.60 (6C, B+C+C'); 26.76 (2C, 4'); 27.20 (1C, 5'); 29.91 (1C, B'); 31.06 (2C, 3'); 42.89 (1C, A'); 46.36 (1C, 2'); 166.65 (1C, E'); 178.57 (1C, 1').  $^{31}\text{P}$  NMR (161 MHz,  $\text{C}_6\text{D}_6$ , 343 K)  $\delta$  ppm: 31.11 (1P,  $\text{P}(\text{CHCO}_2(\text{CH}_2)_2\text{CH}_3)((\text{CH}_2)_3\text{CH}_3)_3$ ); 33.56 (1P,  $\text{P}((\text{CH}_2)_3\text{CH}_3)_4$ ).

#### 4.8 $[\text{P}_{4,4,4,4}][\text{C}_5\text{COO}]$

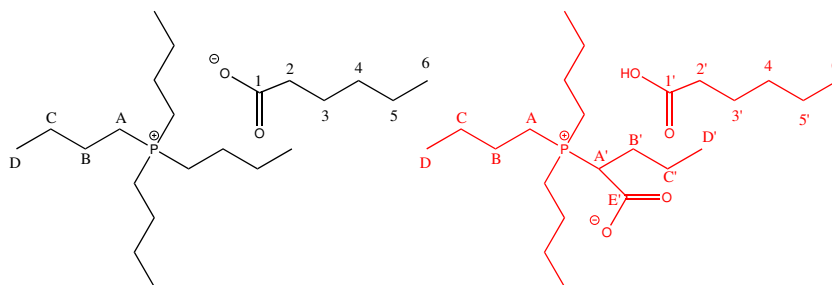

Figure S24 – Chemical structure of the  $[\text{P}_{4,4,4,4}][\text{C}_{11}\text{COO}]$  (left) before and (right) after  $\text{CO}_2$  absorption.

**Tetrabutylphosphonium hexanoate  $[\text{P}_{4,4,4,4}][\text{C}_5\text{COO}]$  after  $\text{CO}_2$  absorption:**  $^1\text{H}$  NMR (400 MHz,  $\text{C}_6\text{D}_6$ , 343 K)  $\delta$  ppm: 0.93 (m, 3H, 6'); 1.00 (m, 12H, D+D'); 1.35 (m, 4H, 4'+5'); 1.54 (m, 8H, C + C'); 1.58 (m, 2H, 3'); 1.65 (m, 8H, B+B'); 2.09 (t, 2H,  $^3J_{HH} = 7.6$  Hz, 2'); 2.45 (m, 6H, A); 2.62 (m, 8H, A); 2.87 (t, 1H,  $^3J_{HH} = 11.5$  Hz, A'); 16.92 (1H, RCOOH).  $^{13}\text{C}$  NMR (100 MHz,  $\text{C}_6\text{D}_6$ , 343 K)  $\delta$  ppm: 13.68 (3C, D); 13.73 (4C, D); 14.08 (1C, D'); 14.31 (1C, 6'); 19.04 (4C, A); 19.74 (3C, A); 23.09 (1C, 5'); 24.17-24.39 (3C, B); 24.39-24.68 (4C, C+C'); 26.78 (1C, 3'); 29.95 (1C, B'); 37.71 (1C, 4'); 38.26 (1C, 2'); 42.61 (1C, A'); 166.75 (1C, E'); 176.12 (1C, 1').  $^{31}\text{P}$  NMR (161 MHz,  $\text{C}_6\text{D}_6$ , 343 K)  $\delta$  ppm: 31.17 (1P,  $\text{P}(\text{CHCO}_2(\text{CH}_2)_2\text{CH}_3)((\text{CH}_2)_3\text{CH}_3)_3$ ); 33.69 (1P,  $\text{P}((\text{CH}_2)_3\text{CH}_3)_4$ ).

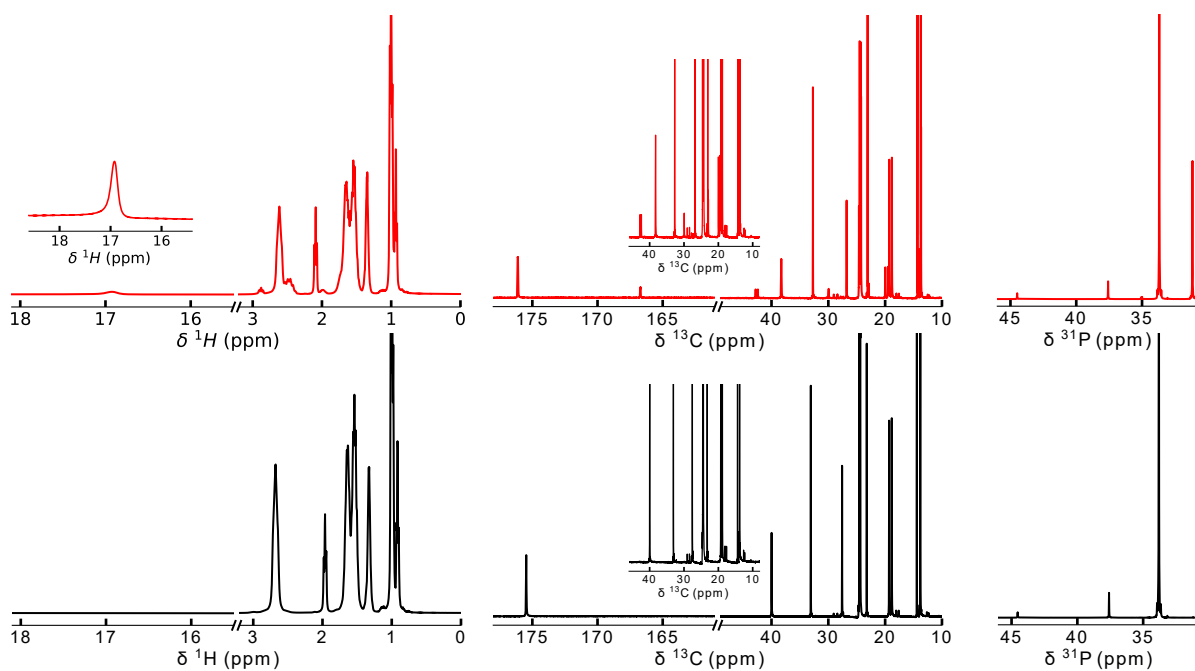

Figure S25 – (Left)  $^1\text{H}$ , (middle)  $^{13}\text{C}$  and (right)  $^{31}\text{P}$  NMR spectra of  $[\text{P}_{4,4,4,4}][\text{C}_5\text{COO}]$  — before and — after  $\text{CO}_2$  absorption at 343 K.

#### 4.9 $[\text{P}_{4,4,4,4}][\text{C}_{11}\text{COO}]$

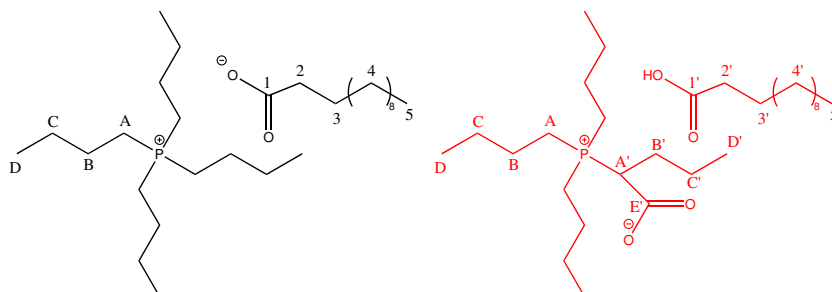

Figure S26 – Chemical structure of the  $[\text{P}_{4,4,4,4}][\text{C}_{11}\text{COO}]$  (left) before and (right) after  $\text{CO}_2$  absorption.

**Tetrabutylphosphonium dodecanoate  $[\text{P}_{4,4,4,4}][\text{C}_{11}\text{COO}]$  after  $\text{CO}_2$  absorption:**  $^1\text{H}$  NMR (400 MHz,  $\text{C}_6\text{D}_6$ , 343 K)  $\delta$  ppm: 0.93 (t, 3H,  $^3J_{\text{HH}} = 6.1$  Hz, 5'); 1.00 (t, 12H,  $^3J_{\text{HH}} = 7.4$  Hz, D+D'); 1.33 (m, 18H, 4'); 1.55 (m, 8H, C + C'); 1.59 (m, 2H, 3'); 1.66 (m, 8H, B+B'); 2.10 (t, 2H,  $^3J_{\text{HH}} = 7.2$  Hz, 2'); 2.45 (m, 6H, A); 2.60 (m, 8H, A); 2.88 (t, 1H,  $^3J_{\text{HH}} = 11.5$  Hz, A'); 17.04 (1H, RCOOH).  $^{13}\text{C}$  NMR (100 MHz,  $\text{C}_6\text{D}_6$ , 343 K)  $\delta$  ppm: 13.60 (3C, D); 13.66 (4C, D); 14.00 (1C, D'); 14.17 (1C, 5'); 19.21 (4C, A); 19.91 (3C, A); 22.98, 29.62-30.48, 32.31 (8C, 4'); 24.19-24.68 (7C, B+C+C'); 27.09 (1C, 3'); 30.29 (1C, B'); 38.19 (1C, 2'); 42.62 (1C, A'); 166.68 (1C, E'); 176.20 (1C, 1').  $^{31}\text{P}$  NMR (161 MHz,  $\text{C}_6\text{D}_6$ ,

343 K)  $\delta$  ppm: 31.22 (1P,  $\mathbf{P}(\text{CHCO}_2(\text{CH}_2)_2\text{CH}_3)((\text{CH}_2)_3\text{CH}_3)_3$ ); 33.71 (1P,  $\mathbf{P}((\text{CH}_2)_3\text{CH}_3)_4$ ).

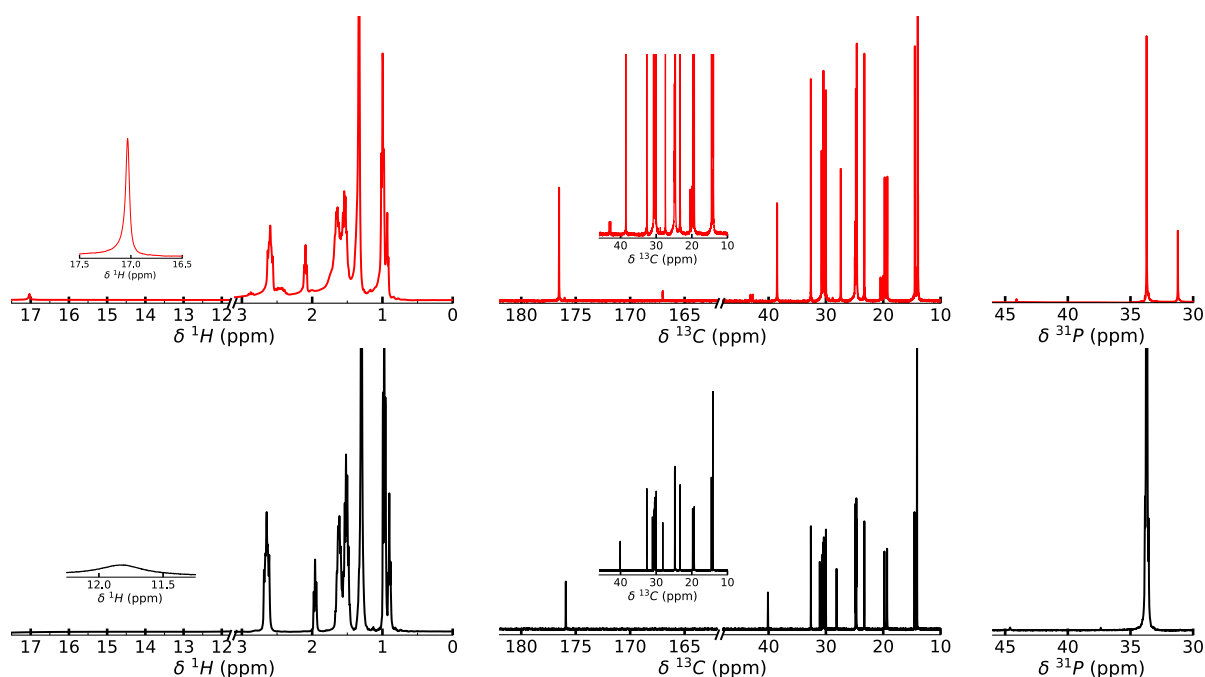

Figure S27 – (Left)  $^1\text{H}$ , (middle)  $^{13}\text{C}$  and (right)  $^{31}\text{P}$  NMR spectra of  $[\text{P}_{4,4,4,4}][\text{C}_{11}\text{COO}]$  — before and — after  $\text{CO}_2$  absorption at 343 K.

#### 4.10 $[\text{P}_{6,6,6,14}][\text{C}_{11}\text{COO}]$

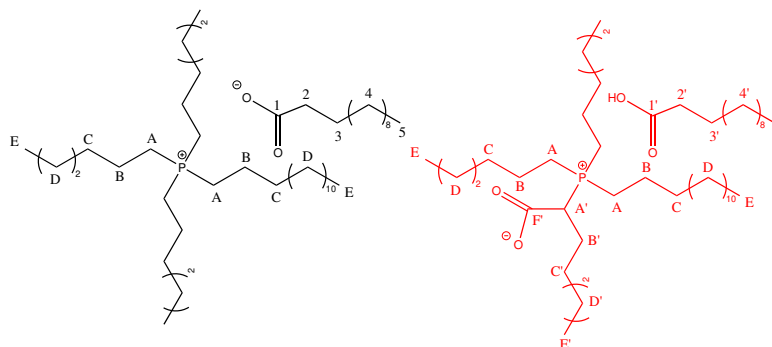

Figure S28 – Chemical structure of the  $[\text{P}_{6,6,6,14}][\text{C}_{11}\text{COO}]$  (left) before and (right) after  $\text{CO}_2$  absorption. For the sake of clarity, the  $\text{CO}_2$  absorbed has been represented on one of the hexyl alkyl chain of the phosphonium cation, but it also could be grafted on the tetradecyl alkyl chain without any clear preference.

**Trihexyltetradecylphosphonium dodecanoate  $[\text{P}_{6,6,6,14}][\text{C}_{11}\text{COO}]$  after  $\text{CO}_2$  absorption:**  $^1\text{H}$  NMR (400 MHz,  $\text{C}_6\text{D}_6$ , 343 K)  $\delta$  ppm: 0.94-1.02 (m, 15H,  $5'+\text{E}+\text{E}'$ ); 1.34-1.46 (m, 48H,  $\text{D}+\text{D}'+4'$ ); 1.56 (m, 8H,  $\text{C} + \text{C}'$ ); 1.63 (m, 2H,  $3'$ ); 1.69 (m, 8H,  $\text{B}+\text{B}'$ ); 2.15 (t, 2H,  $^3J_{\text{HH}} = 7.3$  Hz,  $2'$ ); 2.45 (m, 6H, A); 2.64 (m, 8H, A); 2.88 (t, 1H,  $^3J_{\text{HH}} = 11.4$  Hz,  $\text{A}'$ ); 14.40 (1H, RCOOH).  $^{13}\text{C}$  NMR (100 MHz,

$C_6D_6$ , 343 K)  $\delta$  ppm: 14.26 (5C, E+E'+5'); 19.50 (4C, A); 20.24 (3C, A); 22.31 (3C, B); 22.87, 23.06, 29.44-32.44 (24C, D+D'+4'); 30.82 (1C, B'); 31.01 (4C, C+C'); 26.89 (1C, 3'); 37.70 (1C, 2'); 42.49 (1C, A'); 166.81 (1C, E'); 177.00 (1C, 1').  $^{31}P$  NMR (161 MHz,  $C_6D_6$ , 343 K)  $\delta$  ppm: 31.19 (1P,  $P(CHCO_2(CH_2)_2CH_3)((CH_2)_3CH_3)_3$ ); 33.36 (1P,  $P((CH_2)_3CH_3)_4$ ).

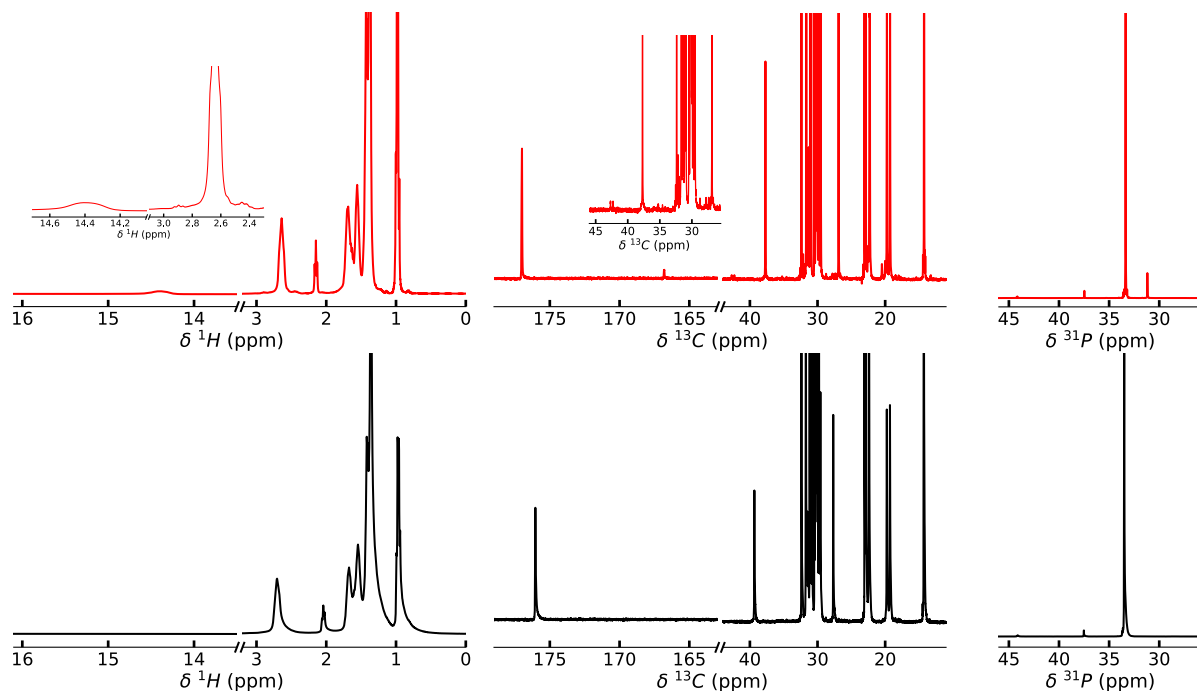

Figure S29 – (Left)  $^1H$ , (middle)  $^{13}C$  and (right)  $^{31}P$  NMR spectra of  $[P_{6,6,6,14}][C_{11}COO]$  — before and — after  $CO_2$  absorption at 343 K.

#### 4.11 $[P_{4,4,4,4}][Me_4C_4COO]$

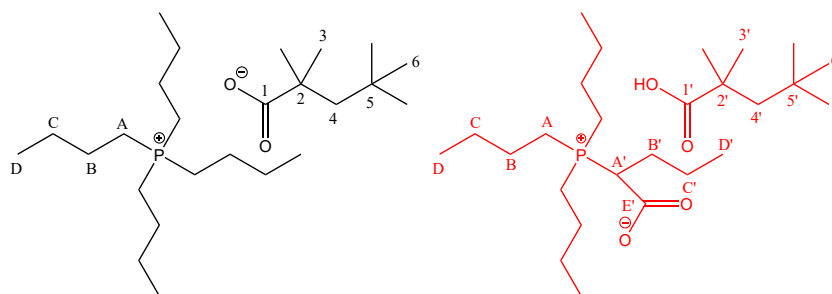

Figure S30 – Chemical structure of the  $[P_{4,4,4,4}][Me_4C_4COO]$  (left) before and (right) after  $CO_2$  absorption.

**Tetrabutylphosphonium 2,2,4,4-tetramethylpentanoate  $[P_{4,4,4,4}][Me_4C_4COO]$  after  $CO_2$  absorption:**  $^1H$  NMR (400 MHz,  $C_6D_6$ , 343 K)  $\delta$  ppm: 0.93-1.01 (m, 21H, 6 + D + D'); 1.11 (s, 6H, 3'); 1.51 (m, 8H, C + C'); 1.58 (s, 2H, 4'); 1.62 (m, 8H, B + B'); 2.52 (m, 6H, A); 2.69 (m, 8H, A); 2.85 (t, 1H,  $^3J_{HH}$



= 12.0 Hz, A'); 17.68 (1H, RCOOH).  $^{13}\text{C}$  NMR (100 MHz,  $\text{C}_6\text{D}_6$ , 343 K)  $\delta$  ppm: 13.79 (3C, D); 13.85 (4C, D); 14.20 (1C, D'); 19.24 (4C, A); 19.82 (3C, A); 24.12-24.75 (8C, B + B' + C + C'); 30.05 (2C, 3'); 31.86 (3C, 6'); 32.18 (1C, 5'); 42.61 (1C, A'); 43.13 (1C, 2'); 55.05 (1C, 4'); 166.76 (1C, E'); 180.39 (1C, 1').  $^{31}\text{P}$  NMR (161 MHz,  $\text{C}_6\text{D}_6$ , 343 K)  $\delta$  ppm: 31.24 (1P,  $\text{P}(\text{CHCO}_2(\text{CH}_2)_2\text{CH}_3)((\text{CH}_2)_3\text{CH}_3)_3$ ); 33.73 (1P,  $\text{P}((\text{CH}_2)_3\text{CH}_3)_4$ ).

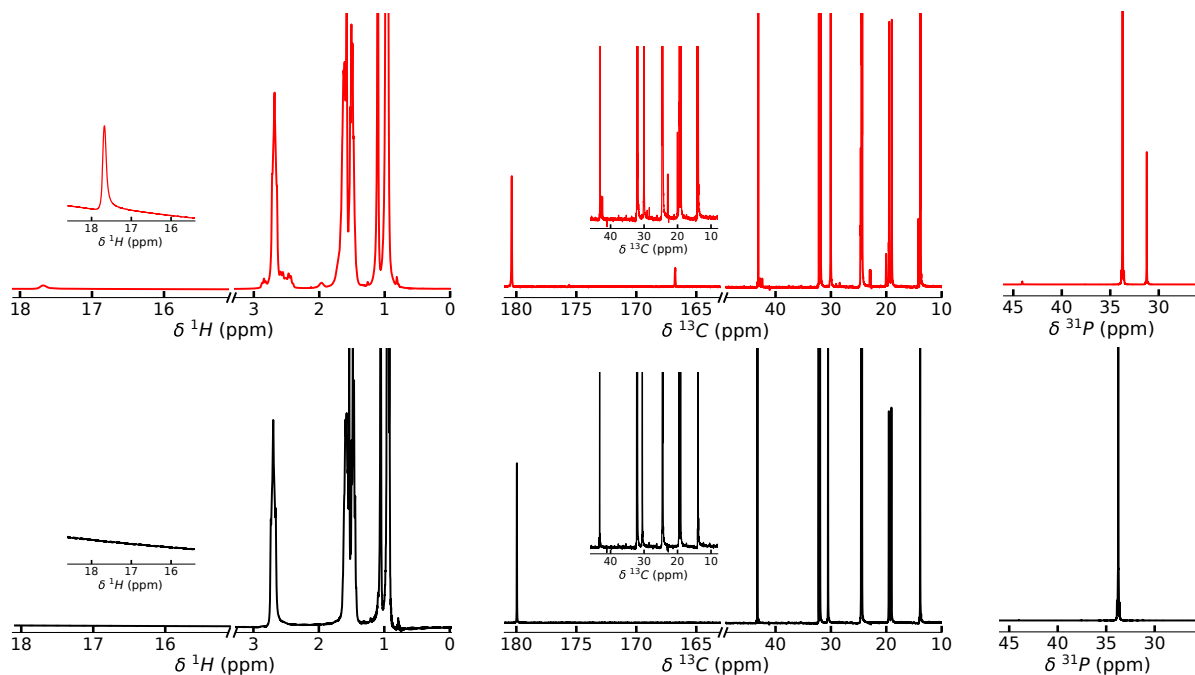

Figure S31 – (Left)  $^1\text{H}$ , (middle)  $^{13}\text{C}$  and (right)  $^{31}\text{P}$  NMR spectra of  $[\text{P}_{4,4,4,4}][\text{Me}_4\text{C}_4\text{COO}]$  — before and — after  $\text{CO}_2$  absorption at 343 K.

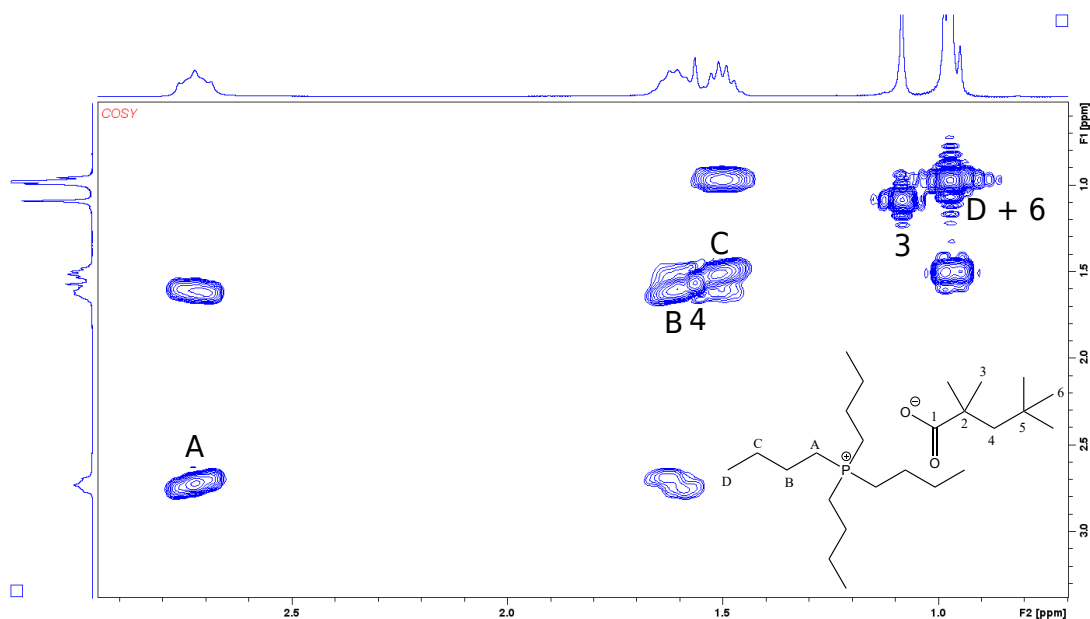

Figure S32 – COSY NMR spectrum of  $[\text{P}_{4,4,4,4}][\text{Me}_4\text{C}_4\text{COO}]$  at 343 K.

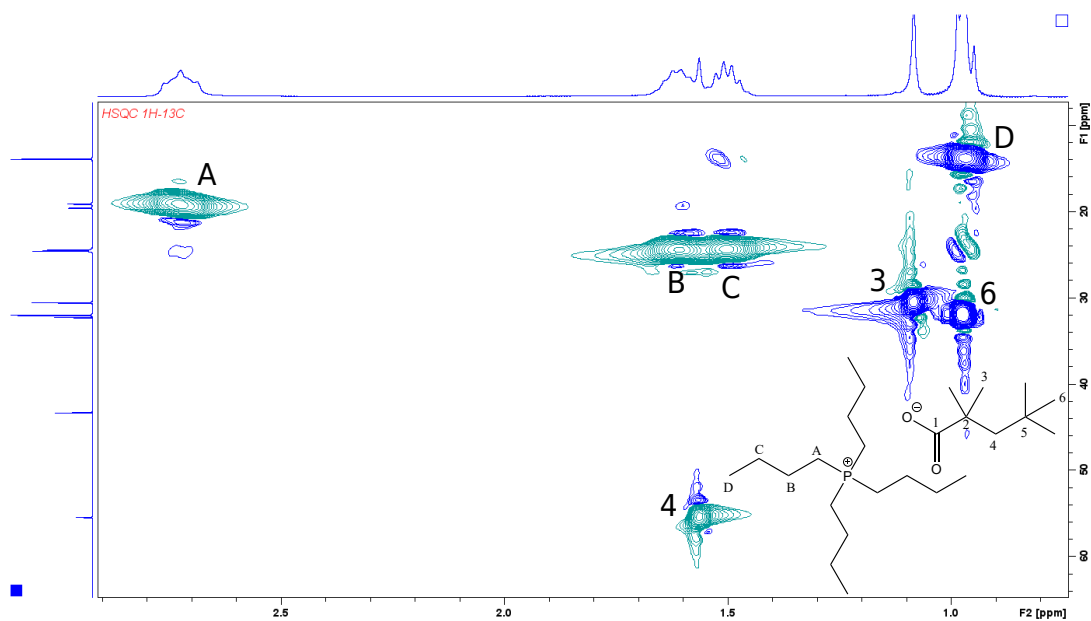

Figure S33 – HSQC NMR spectrum of  $[P_{4,4,4,4}][Me_4C_4COO]$  at 343 K.

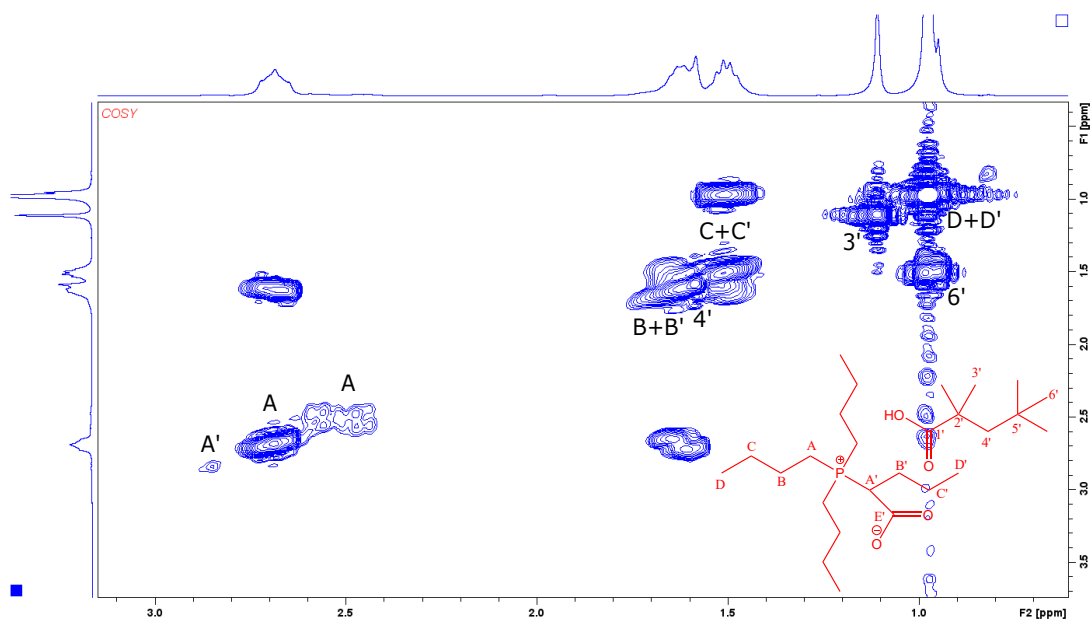

Figure S34 – COSY NMR spectrum of  $[P_{4,4,4,4}][Me_4C_4COO]$  after  $CO_2$  absorption at 343 K.

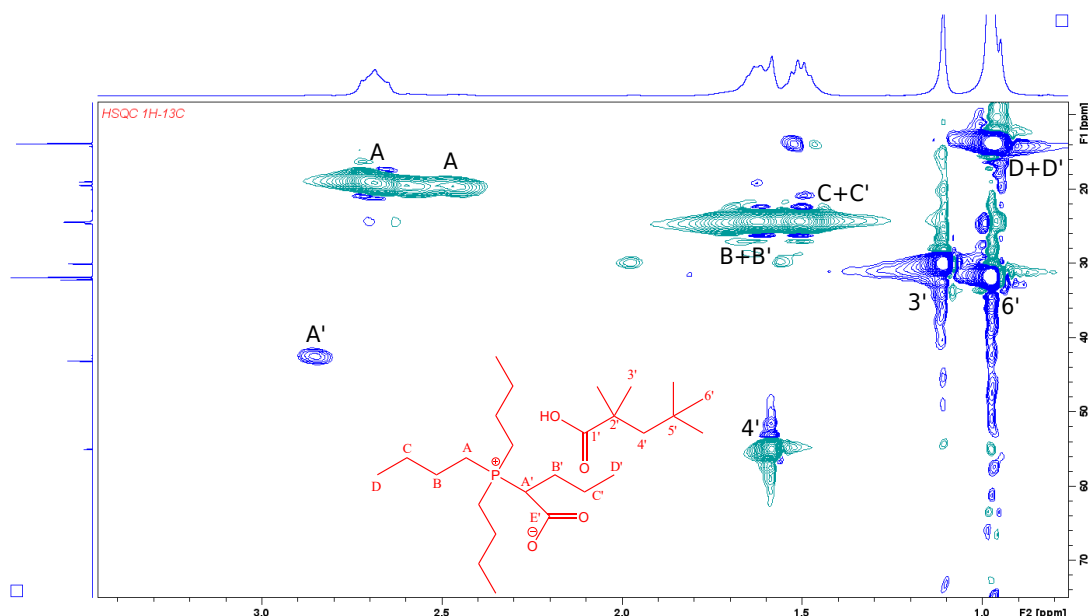

Figure S35 – HSQC NMR spectrum of  $[P_{4,4,4,4}][Me_4C_4COO]$  after  $CO_2$  absorption at 343 K.

#### 4.12 $[P_{6,6,6,14}][Me_4C_4COO]$

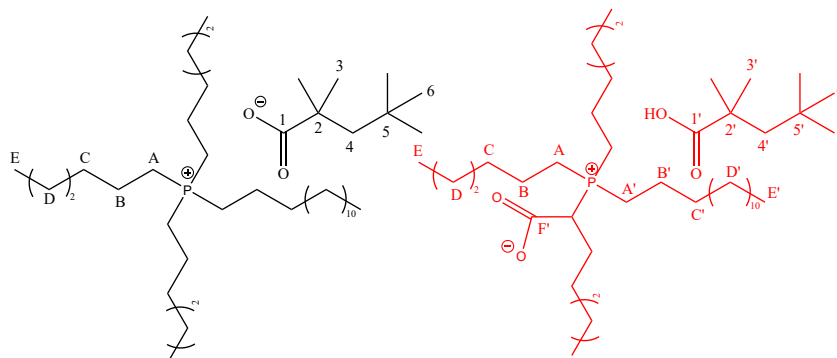

Figure S36 – Chemical structure of the  $[P_{6,6,6,14}][Me_4C_4COO]$  (left) before and (right) after  $CO_2$  absorption. For the sake of clarity, the  $CO_2$  absorbed has been represented on one of the hexyl alkyl chain of the phosphonium cation, but it also could be grafted on the tetradecyl alkyl chain without any clear preference.

**Trihexyltetradecylphosphonium  $[P_{6,6,6,14}][Me_4C_4COO]$  after  $CO_2$  absorption:**  $^1H$  NMR (400 MHz,  $C_6D_6$ , 343 K)  $\delta$  ppm: 0.89-0.99 (m, 12H, E+E'); 1.02 (s, 9H, 6'); 1.17 (s, 6H, 3'); 1.27-1.46 (m, 32H, D+D'); 1.52 (m, 8H, C + C'); 1.64 (s, 2H, 4'); 1.68 (m, 8H, B+B'); 2.48 (m, 6H, A); 2.73 (m, 8H, A); 2.89 (m, 1H, A'); 17.08 (1H, RCOOH).  $^{13}C$  NMR (100 MHz,  $C_6D_6$ , 343 K)  $\delta$  ppm: 14.27, 14.33 (4C, E + E'); 19.55 (4C, A); 20.28 (3C, A); 22.29-22.67 (4C, B+B'); 22.85, 23.02, 29.28-30.25, 31.27-32.53 (25C, D + D' + 5'); 29.90 (2C, 3'); 30.88-31.25 (4C, C+C'); 31.88 (3C, 6'); 42.42 (1C, A'); 43.06 (1C, 2'); 54.84 (1C, 4'); 166.83 (1C, E'); 180.77 (1C, 1').  $^{31}P$  NMR (161 MHz,  $C_6D_6$ , 343 K)  $\delta$  ppm: 31.36

(1P, P(CHCO<sub>2</sub>(CH<sub>2</sub>)<sub>2</sub>CH<sub>3</sub>)((CH<sub>2</sub>)<sub>3</sub>CH<sub>3</sub>)<sub>3</sub>); 33.64 (1P, P((CH<sub>2</sub>)<sub>3</sub>CH<sub>3</sub>)<sub>4</sub>).

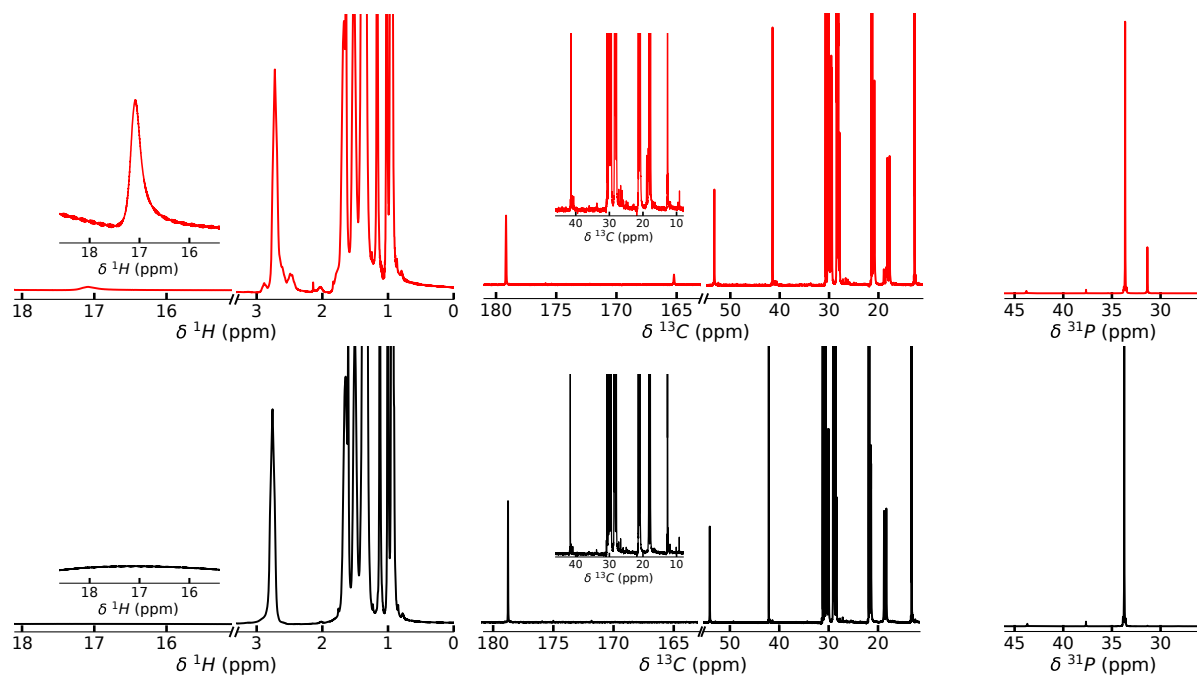

Figure S37 – (Left) <sup>1</sup>H, (middle) <sup>13</sup>C and (right) <sup>31</sup>P NMR spectra of [P<sub>6,6,6,14</sub>][Me<sub>4</sub>C<sub>4</sub>COO] — before and — after CO<sub>2</sub> absorption at 343 K.

### 4.13 DOSY experiments

DOSY NMR experiments were conducted on  $^1\text{H}$  atoms to determine the self-diffusion coefficients ( $D$ ) of the ions before and after the absorption of  $\text{CO}_2$ . These measurements aimed to gain insights into the dynamic properties of the ILs. The obtained results are presented in Figure S38, and the exact values can be found in Table S14. As previously emphasized in a relevant study,<sup>1</sup> the self-diffusion coefficients of both the anion and cation in the neat ILs were found to be similar. This observation suggests the presence of strong cation-anion associations, despite the substantial difference in their masses.

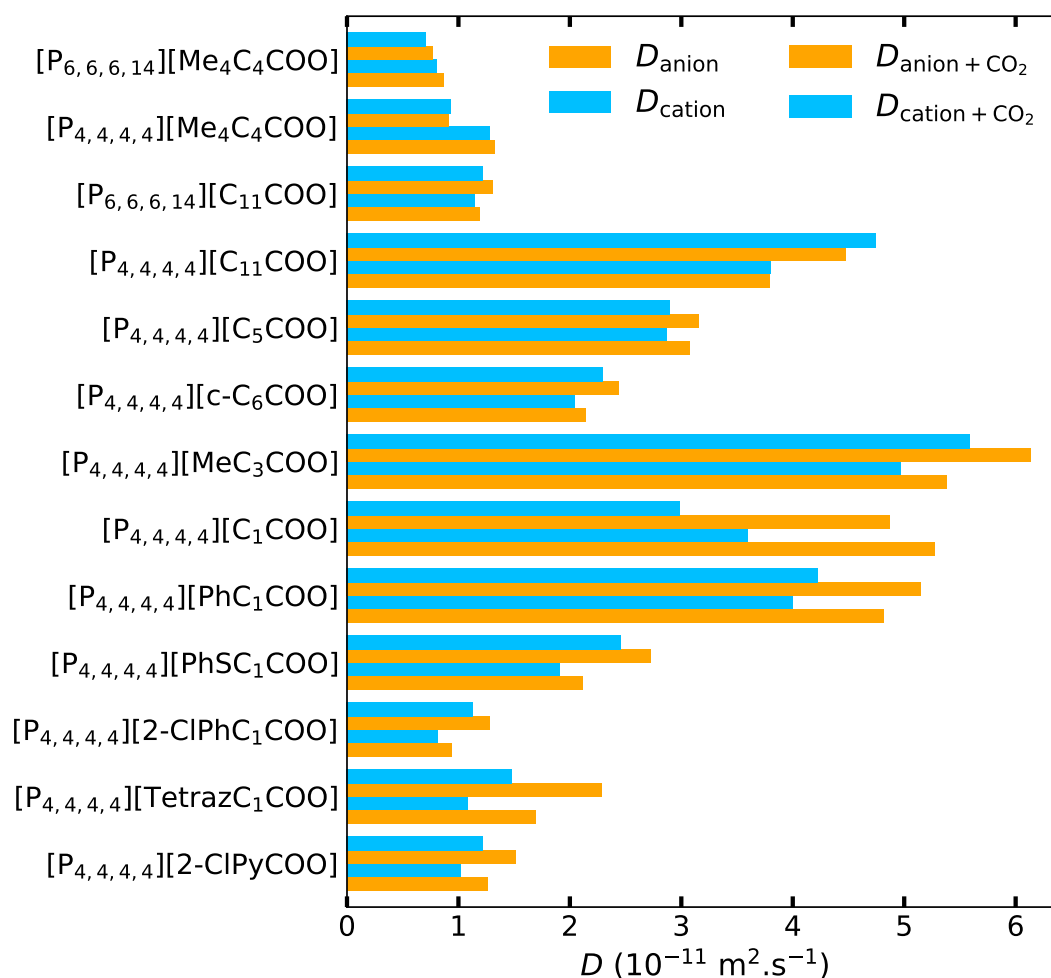

Figure S38 – Histogram representing the experimental self-diffusion coefficients ( $D$ ) of both the anion and the cation in the ILs before and after being pressurized by  $\text{CO}_2$  at 343 K by DOSY-NMR experiments.

Table S14 – Self-diffusion coefficients ( $D$ ) of the ILs under study at 343 K by DOSY-NMR experiments. The  $D$  values of the neat ILs were determined in a previous study.<sup>1</sup>

| Sample                                                                           | $T$<br>K | $D_{\text{anion}}$<br>$10^{-11}\text{m}^2\text{s}^{-1}$ | $D_{\text{cation}}$<br>$10^{-11}\text{m}^2\text{s}^{-1}$ |
|----------------------------------------------------------------------------------|----------|---------------------------------------------------------|----------------------------------------------------------|
| [P <sub>4,4,4,4</sub> ][2-ClPyCOO]                                               | 343      | 1.26 ± 0.04                                             | 1.02 ± 0.02                                              |
| [P <sub>4,4,4,4</sub> ][2-ClPyCOO] + CO <sub>2</sub>                             | 343      | 1.51 ± 0.03                                             | 1.22 ± 0.02                                              |
| [P <sub>4,4,4,4</sub> ][TetrazC <sub>1</sub> COO]                                | 343      | 1.69 ± 0.008                                            | 1.08 ± 0.003                                             |
| [P <sub>4,4,4,4</sub> ][TetrazC <sub>1</sub> COO] + CO <sub>2</sub> <sup>6</sup> | 343      | 2.28 ± 0.01                                             | 1.48 ± 0.009                                             |
| [P <sub>4,4,4,4</sub> ][2-ClPhC <sub>1</sub> OHCOO]                              | 343      | 0.94 ± 0.008                                            | 0.81 ± 0.004                                             |
| [P <sub>4,4,4,4</sub> ][2-ClPhC <sub>1</sub> OHCOO] + CO <sub>2</sub>            | 343      | 1.28 ± 0.003                                            | 1.13 ± 0.007                                             |
| [P <sub>4,4,4,4</sub> ][PhSC <sub>1</sub> COO]                                   | 343      | 2.11 ± 0.007                                            | 1.91 ± 0.005                                             |
| [P <sub>4,4,4,4</sub> ][PhSC <sub>1</sub> COO] + CO <sub>2</sub>                 | 343      | 2.72 ± 0.005                                            | 2.45 ± 0.004                                             |
| [P <sub>4,4,4,4</sub> ][PhC <sub>1</sub> COO]                                    | 343      | 4.81 ± 0.01                                             | 4.00 ± 0.01                                              |
| [P <sub>4,4,4,4</sub> ][PhC <sub>1</sub> COO] + CO <sub>2</sub>                  | 343      | 5.15 ± 0.03                                             | 4.22 ± 0.02                                              |
| [P <sub>4,4,4,4</sub> ][C <sub>1</sub> COO]                                      | 343      | 5.27 ± 0.01                                             | 3.59 ± 0.005                                             |
| [P <sub>4,4,4,4</sub> ][C <sub>1</sub> COO] + CO <sub>2</sub>                    | 343      | 4.87 ± 0.02                                             | 2.98 ± 0.007                                             |
| [P <sub>4,4,4,4</sub> ][MeC <sub>3</sub> COO]                                    | 343      | 5.38 ± 0.02                                             | 4.97 ± 0.01                                              |
| [P <sub>4,4,4,4</sub> ][MeC <sub>3</sub> COO] + CO <sub>2</sub>                  | 343      | 6.13 ± 0.03                                             | 5.59 ± 0.02                                              |
| [P <sub>4,4,4,4</sub> ][c-C <sub>6</sub> COO]                                    | 343      | 2.14 ± 0.006                                            | 2.04 ± 0.02                                              |
| [P <sub>4,4,4,4</sub> ][c-C <sub>6</sub> COO] + CO <sub>2</sub>                  | 343      | 2.44 ± 0.03                                             | 2.29 ± 0.01                                              |
| [P <sub>4,4,4,4</sub> ][C <sub>5</sub> COO]                                      | 343      | 3.07 ± 0.003                                            | 2.87 ± 0.002                                             |
| [P <sub>4,4,4,4</sub> ][C <sub>5</sub> COO] + CO <sub>2</sub>                    | 343      | 3.15 ± 0.01                                             | 2.89 ± 0.01                                              |
| [P <sub>4,4,4,4</sub> ][C <sub>11</sub> COO]                                     | 343      | 3.79 ± 0.03                                             | 3.80 ± 0.02                                              |
| [P <sub>4,4,4,4</sub> ][C <sub>11</sub> COO] + CO <sub>2</sub>                   | 343      | 4.47 ± 0.01                                             | 4.74 ± 0.02                                              |
| [P <sub>6,6,6,14</sub> ][C <sub>11</sub> COO]                                    | 343      | 1.19 ± 0.004                                            | 1.14 ± 0.004                                             |
| [P <sub>6,6,6,14</sub> ][C <sub>11</sub> COO] + CO <sub>2</sub>                  | 343      | 1.31 ± 0.003                                            | 1.22 ± 0.001                                             |
| [P <sub>4,4,4,4</sub> ][Me <sub>4</sub> C <sub>4</sub> COO]                      | 343      | 1.33 ± 0.003                                            | 1.28 ± 0.002                                             |
| [P <sub>4,4,4,4</sub> ][Me <sub>4</sub> C <sub>4</sub> COO] + CO <sub>2</sub>    | 343      | 0.91 ± 0.002                                            | 0.93 ± 0.001                                             |
| [P <sub>6,6,6,14</sub> ][Me <sub>4</sub> C <sub>4</sub> COO]                     | 343      | 0.86 ± 0.002                                            | 0.80 ± 0.001                                             |
| [P <sub>6,6,6,14</sub> ][Me <sub>4</sub> C <sub>4</sub> COO] + CO <sub>2</sub>   | 343      | 0.77 ± 0.002                                            | 0.70 ± 0.001                                             |

## 5 FT-IR measurements

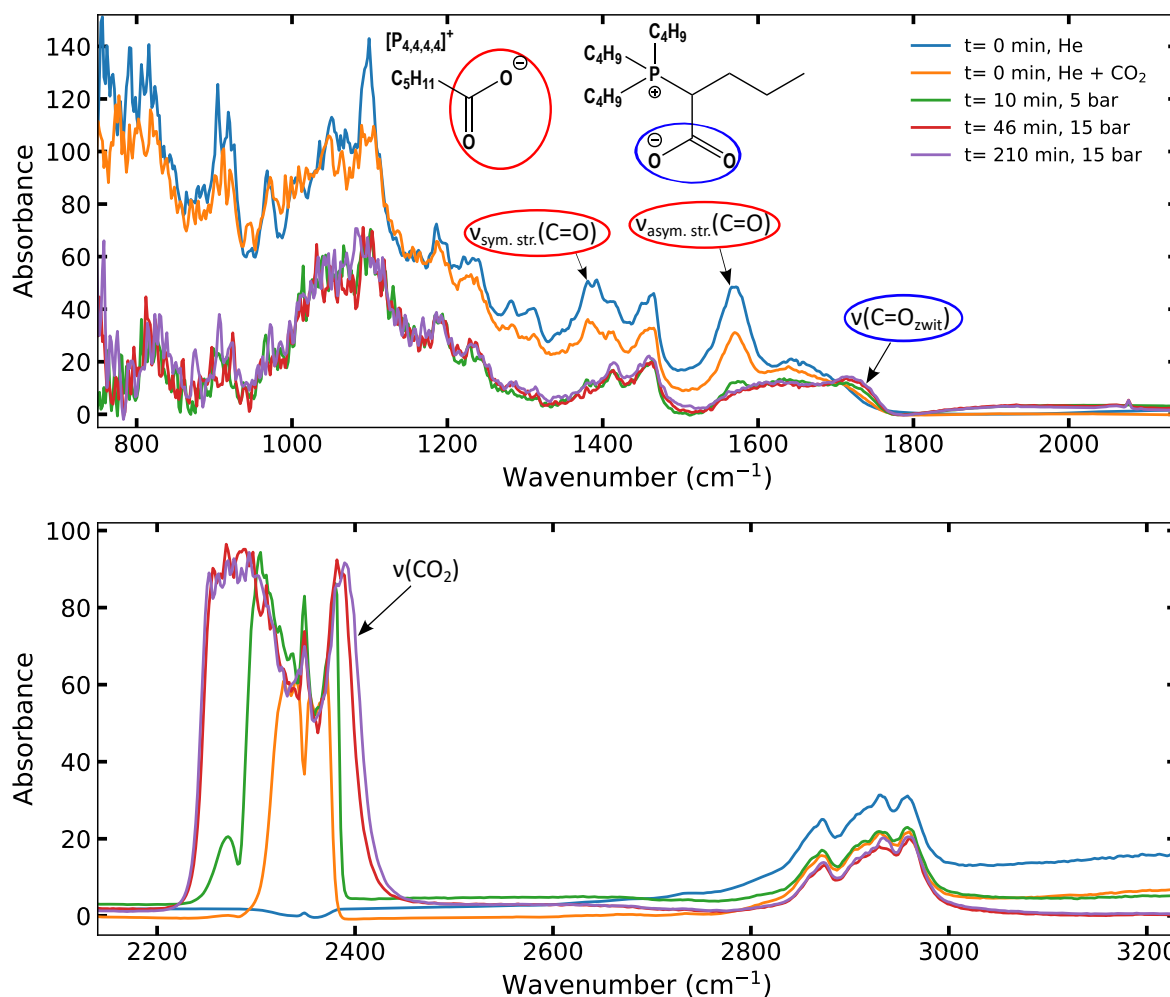

Figure S39 – FT-IR spectrum of  $[P_{4,4,4,4}][C_5COO]$  at different time exposure under  $CO_2$  pressure at 303 K from 750 to 3230  $cm^{-1}$ .

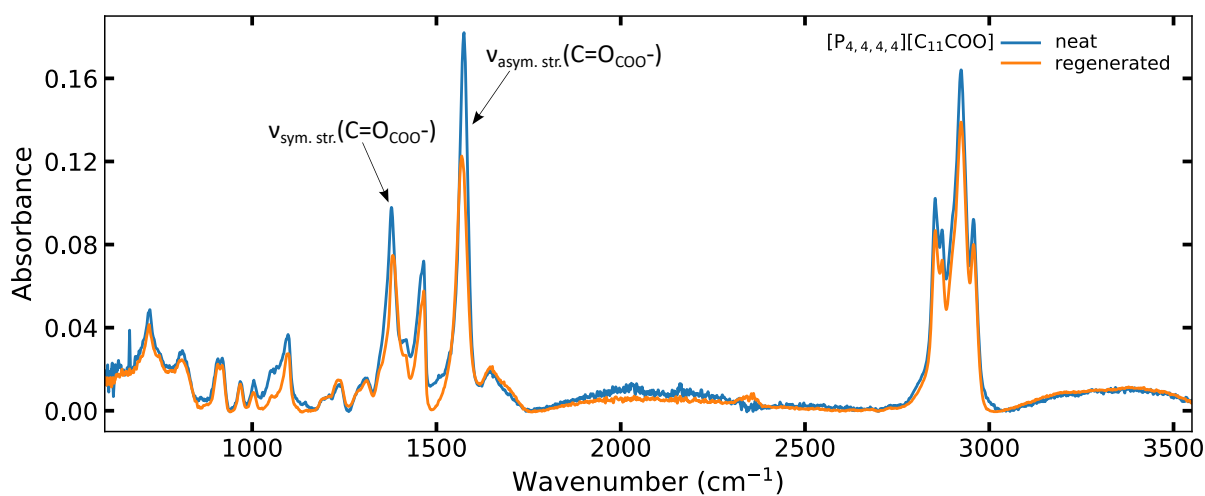

Figure S40 – Comparison of the full FT-IR spectra between the neat  $[P_{4,4,4,4}][C_{11}COO]$  and post-regeneration after 2 cycles of absorption and desorption at 303 K and 343 K.

## 6 Molecular Dynamics Simulations

MD simulations of the ILs in presence of CO<sub>2</sub> have been carried out as they allow further insights into the molecular structure of the systems to have a better understanding of how CO<sub>2</sub> is solvated. The RDFs of [P<sub>4,4,4,4</sub>][C<sub>11</sub>COO] in presence of CO<sub>2</sub>, depicted in Figure 8 as representative example of the other ILs, show that there is no modification of the structural organization of the IL induced by the presence of CO<sub>2</sub>. Indeed, the distances between the negatively charged O<sub>COO<sup>-</sup></sub> of the carboxylate anions and the P<sup>+</sup> and the H<sub>α</sub> of the phosphonium cation remain the same. The CN of these two different interacting sites remain almost identical to the case without CO<sub>2</sub> as they slightly decrease from 1.01 to 1.00 and 4.53 to 4.51, respectively. The presence of CO<sub>2</sub> into the system does not seem to perturb the interaction between the two ions. The CO<sub>2</sub> molecules are preferentially located around the carboxylate head of the anion with the carbon atoms oriented toward the negatively charged oxygen atoms at 2.183 Å with a coordination number of about 0.04 in [P<sub>4,4,4,4</sub>][C<sub>11</sub>COO]. More generally, the RDFs and the CNs of these two interacting sites are similar in all the ILs even in the presence of CO<sub>2</sub> (Figure S43). Even the microscopic structures of [P<sub>4,4,4,4</sub>][2 – ClPyCOO] (Figure S44) and [P<sub>4,4,4,4</sub>][TetracC<sub>1</sub>COO],<sup>6</sup> which were presenting slightly different RDFs because of secondary intermolecular interactions, are not impacted by the presence of CO<sub>2</sub>.

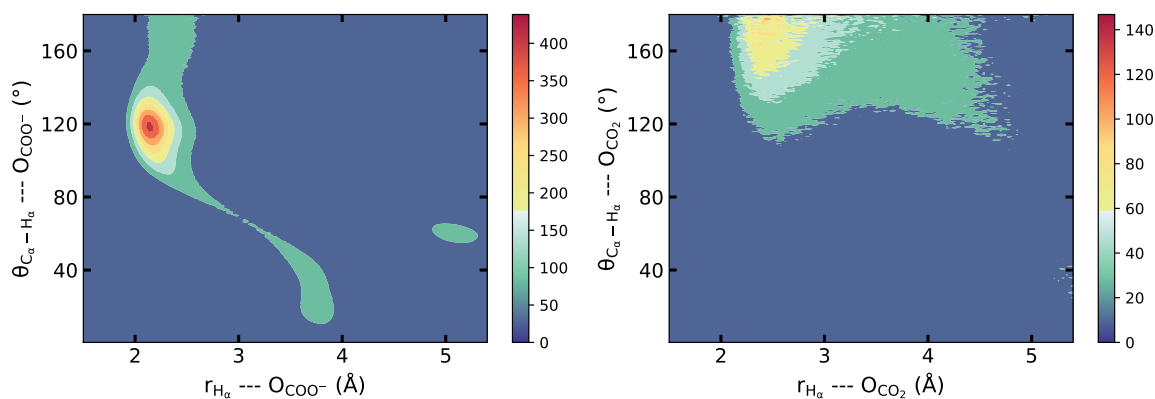

Figure S41 – Combined distribution function of the Angular Distribution Function (ADF) as a function of the RDF in [P<sub>4,4,4,4</sub>][C<sub>11</sub>COO] showing the angle between (left) C<sub>α</sub>–H<sub>α</sub> of the [P<sub>4,4,4,4</sub>]<sup>+</sup> cation, (right) the oxygen atoms of CO<sub>2</sub> with the oxygen atoms O<sub>COO<sup>-</sup></sub> of the carboxylate anion as a function of the distance between the acidic proton H<sub>α</sub> and the O<sub>CO<sub>2</sub></sub> with the negatively charged O<sub>COO<sup>-</sup></sub> at 343 K, respectively.

The CDFs of the C<sub>α</sub>–H<sub>α</sub> ··· O<sub>COO<sup>-</sup></sub> angle as a function of the distance between the acidic proton H<sub>α</sub> and O<sub>COO<sup>-</sup></sub>, and the CDFs of the C<sub>α</sub>–H<sub>α</sub> ··· O<sub>CO<sub>2</sub></sub> angle as a function of the distance between the acidic proton H<sub>α</sub> and O<sub>CO<sub>2</sub></sub> in all the ILs under study have been calculated at 343 K, but only the ones of



[P<sub>4,4,4,4</sub>][C<sub>11</sub>COO] are depicted Figure S41 for the sake of clarity as they are all similar.

Even in presence of CO<sub>2</sub>, the CDFs are similar to the ones of the neat ILs with an C<sub>α</sub>-H<sub>α</sub>···O<sub>COO</sub><sup>-</sup> angle of approximately 120° at a distance about 2.15–2.18 Å at the exception of [P<sub>4,4,4,4</sub>][TetraC<sub>1</sub>COO] and [P<sub>4,4,4,4</sub>][2-CIPyCOO] which exhibit larger angles of about 123.3°<sup>6</sup> and 124.5°, respectively. The angles are too low to be considered as proper hydrogen bonds which means that the H<sub>α</sub> abstraction is not driven by this interaction. The acid-base equilibrium is not favored by this particular spatial configuration as it is the case with imidazolium carboxylate ILs. Therefore, the differences of absorption capacity are not explained by a particular spatial configuration between the interacting sites revealing that the differences are probably due to thermodynamic features. In imidazolium carboxylate ILs, the proton located on the C<sub>2</sub> position of the 1,3-dialkylimidazolium rings is more acidic. It induces a strong H-bond interaction between O<sub>COO</sub><sup>-</sup> of the carboxylate and this proton resulting in a more favorable initial deprotonation.<sup>9</sup> It is in line with the higher K<sub>eq</sub> determined for these imidazolium ILs.<sup>10</sup>

An C<sub>α</sub>-H<sub>α</sub>···O<sub>CO<sub>2</sub></sub> angle of approximately 179° and a distance of 2.26 Å has been found in all the ILs as illustrated in Figure S41 (right). It indicates the formation of H-bonds between CO<sub>2</sub> and the phosphonium cations, confirming that the most favourable CO<sub>2</sub> solubilization site in phosphonium carboxylate ILs is located between the O<sub>COO</sub><sup>-</sup> of the anion and the H<sub>α</sub> of the cation.

It is interesting to note that in the initial state, the CO<sub>2</sub> molecule is in close proximity to O<sub>COO</sub><sup>-</sup> and H<sub>α</sub> of the phosphonium cation. This observation is consistent with both DFT calculations and MD simulations (Figure S42) indicating that CO<sub>2</sub> is preferentially solvated around the carboxylate head of the anions. This finding suggests that increasing the bulkiness of both the cation and the anion may impede accessibility to the interacting sites, thereby reducing its solubility. This could explain why [P<sub>6,6,6,14</sub>][Me<sub>4</sub>C<sub>4</sub>COO] exhibits a lower CO<sub>2</sub> capture capacity compared to its [P<sub>4,4,4,4</sub>]<sup>+</sup> counterparts.

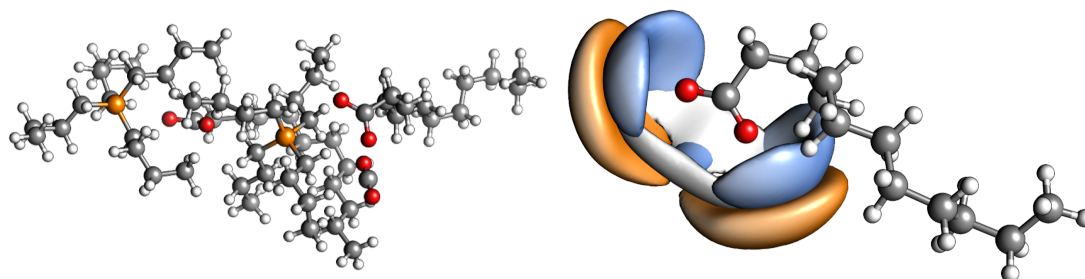

Figure S42 – (Left) The most favorable optimized structure of the initial state in [P<sub>4,4,4,4</sub>][C<sub>11</sub>COO] from *ab initio* calculations. (Right) The SDFs of ■ P<sup>+</sup>, of □ the acidic protons H<sub>α</sub> and of ■ C<sub>CO<sub>2</sub></sub> around the O<sub>COO</sub><sup>-</sup> of the [C<sub>11</sub>COO]<sup>-</sup> anion in [P<sub>4,4,4,4</sub>][C<sub>11</sub>COO] at 343 K. Isodensity contours at 11.6, 14.1 and 0.8 times the average density around the central anion, respectively.

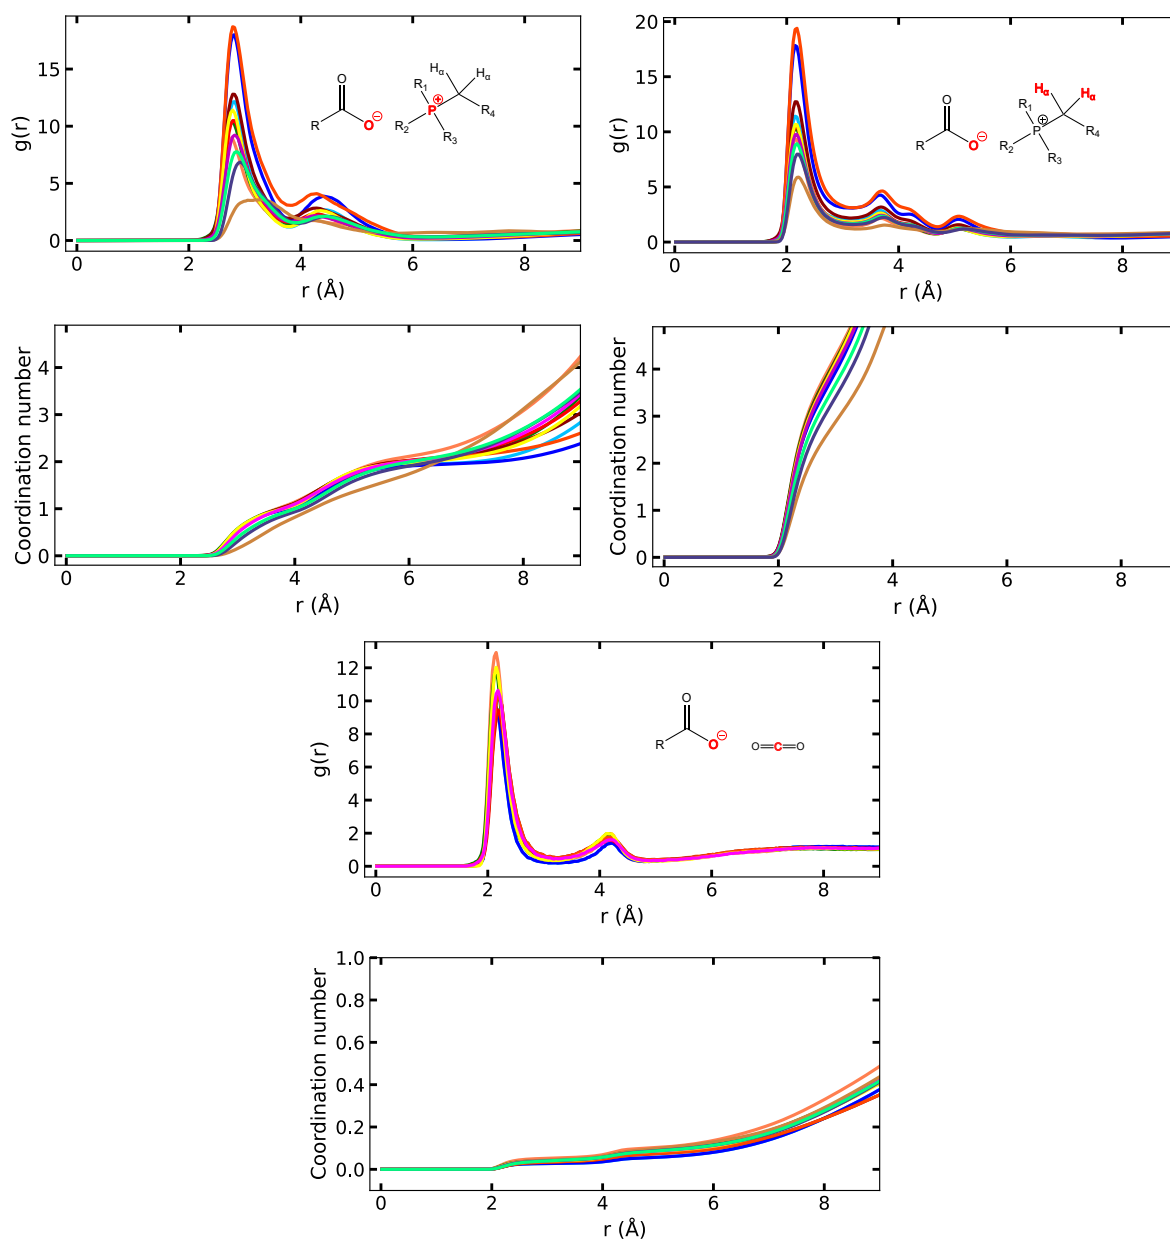

Figure S43 – Comparison of the site-site RDF,  $g(r)$ , of (top left)  $P^+$  and (top right)  $H_\alpha$  of the cation and (bottom)  $C_{CO_2}$  of the  $CO_2$  around  $O_{COO^-}$  of the carboxylate anion and their corresponding coordination number in carboxylate head of the anion and their corresponding coordination numbers in —  $[P_{4,4,4,4}][2-ClPyCOO]$ , —  $[P_{4,4,4,4}][2-ClPhC_1OHCOO]$ , —  $[P_{4,4,4,4}][PhSC_1COO]$ , —  $[P_{4,4,4,4}][PhC_1COO]$ , —  $[P_{4,4,4,4}][C_1COO]$ , —  $[P_{4,4,4,4}][MeC_3COO]$ , —  $[P_{4,4,4,4}][c-C_6COO]$ , —  $[P_{4,4,4,4}][C_5COO]$ , —  $[P_{4,4,4,4}][C_{11}COO]$ , —  $[P_{6,6,6,14}][C_{11}COO]$ , —  $[P_{4,4,4,4}][Me_4C_4COO]$  and —  $[P_{6,6,6,14}][Me_4C_4COO]$  in presence of  $CO_2$  at 343 K.

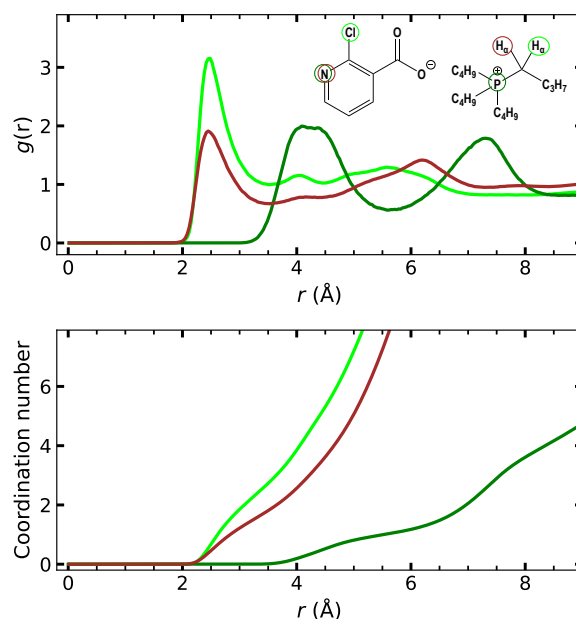

Figure S44 – Site-site RDFs,  $g_{ij}(r)$ , of  $H_\alpha$  around — Cl and — N, —  $P^+$  around N in  $[P_{4,4,4,4}][2 - ClPyCOO]$  in presence of  $CO_2$  at 343 K.

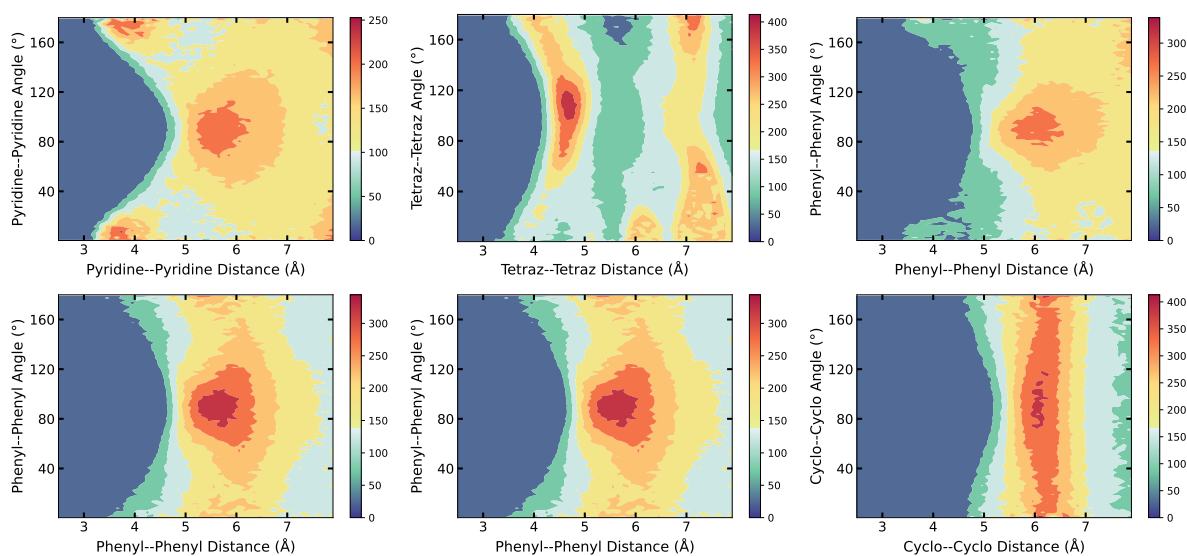

Figure S45 – CDFs of the angle between (top left) two adjacent pyridine rings in  $[P_{4,4,4,4}][2 - ClPyCOO]$ , (top middle) two adjacent tetrazole rings in  $[P_{4,4,4,4}][TetrazC_1COO]$ , two adjacent phenyl rings (top right) in  $[P_{4,4,4,4}][2 - ClPhC_1OHCOO]$ , (bottom left) in  $[P_{4,4,4,4}][PhSC_1COO]$ , (bottom middle) in  $[P_{4,4,4,4}][PhC_1COO]$  and (bottom right) two adjacent cyclohexane in  $[P_{4,4,4,4}][c - C_6COO]$  as a function of the RDF between their center of mass at 343 K in presence of  $CO_2$ .



## 7 *Ab initio* calculations

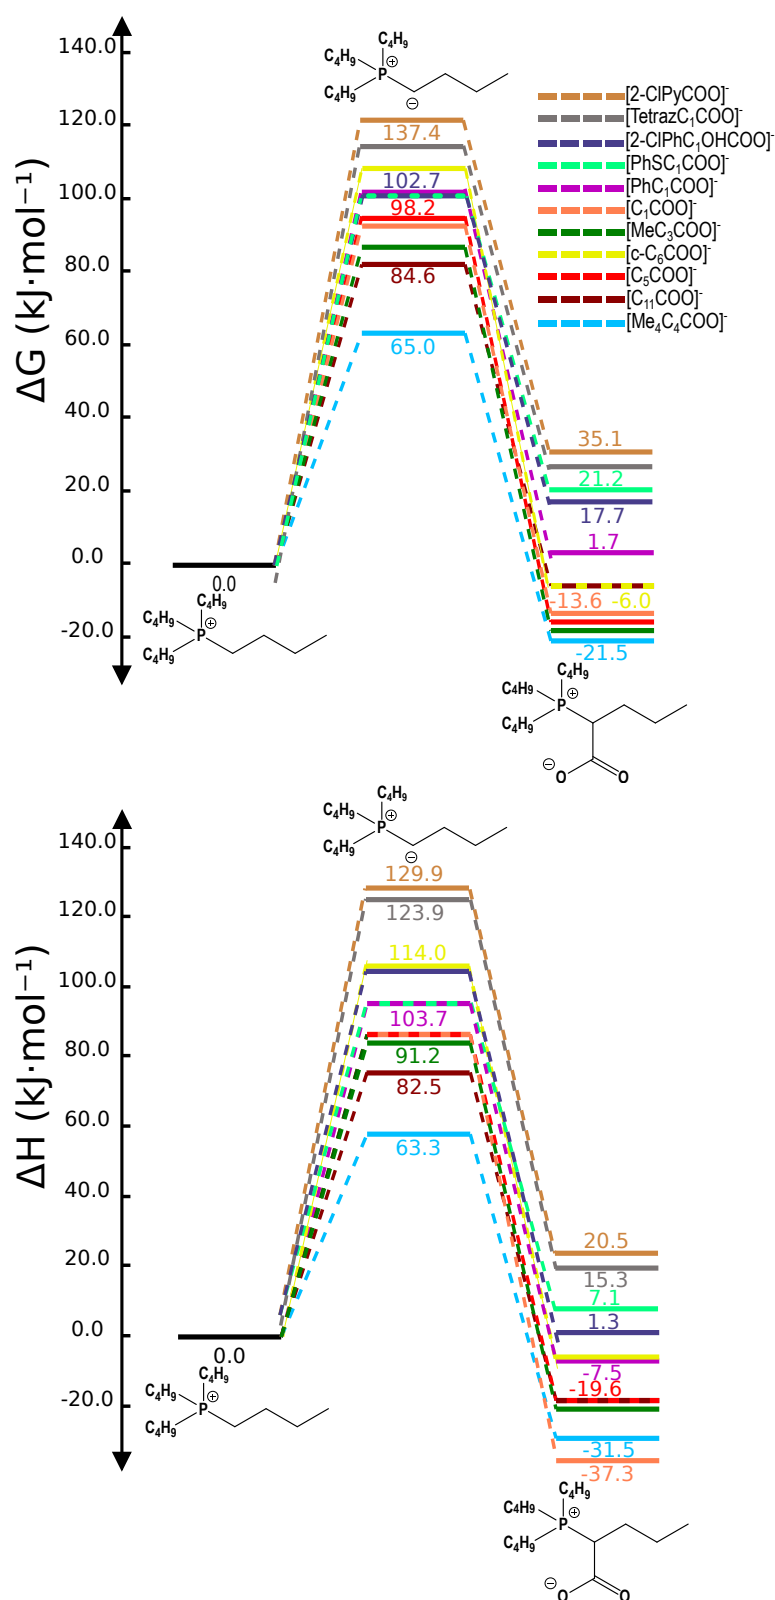

Figure S46 – Relative (top) Gibbs free energy and (bottom) enthalpy of the reactions leading to the chemical capture of CO<sub>2</sub> in — [P<sub>4,4,4,4</sub>][2-CIPyCOO], — [P<sub>4,4,4,4</sub>][TetraC<sub>1</sub>COO],<sup>6</sup> — [P<sub>4,4,4,4</sub>][2-CIPhC<sub>1</sub>OHCOO], — [P<sub>4,4,4,4</sub>][PhSC<sub>1</sub>COO], — [P<sub>4,4,4,4</sub>][PhC<sub>1</sub>COO], — [P<sub>4,4,4,4</sub>][C<sub>1</sub>COO], — [P<sub>4,4,4,4</sub>][MeC<sub>3</sub>COO], — [P<sub>4,4,4,4</sub>][c-C<sub>6</sub>COO], — [P<sub>4,4,4,4</sub>][C<sub>5</sub>COO], — [P<sub>4,4,4,4</sub>][C<sub>11</sub>COO] and — [P<sub>4,4,4,4</sub>][Me<sub>4</sub>C<sub>4</sub>COO] at 343 K with 2:1 stoichiometry (IL:CO<sub>2</sub>).

Table S15 – Atomic charges ( $q$ ) of the different ILs in the initial state (I.S.), intermediate (Interm.) and the final state (F.S.) of the CO<sub>2</sub> absorption mechanism with a 2:1 stoichiometry (IL:CO<sub>2</sub>) as well as the related HOMO energy. All the anions are paired with the [P<sub>4,4,4,4</sub>]<sup>+</sup> cation. As the charges carried by the [P<sub>4,4,4,4</sub>-CO<sub>2</sub>]<sup>-</sup> zwitterion and the free CO<sub>2</sub> are approximately 0, they are not displayed for the sack of clarity.

| Sample                                          | $q([P_{4,4,4,4}]^+)$<br>e | $q([RCOO]^-)$<br>e | $q(\text{Ylide})$<br>e | $q(\text{RCOOH})$<br>e | $E(\text{HOMO})$<br>eV |
|-------------------------------------------------|---------------------------|--------------------|------------------------|------------------------|------------------------|
| [2 – ClPyCOO] I.S.                              | 0.58 & 0.65               | -0.60 & -0.63      | -                      | -                      | -8.02                  |
| [2 – ClPyCOO] Interm.                           | -0.73                     | -0.52              | -0.08                  | -0.10                  | -5.57                  |
| [2 – ClPyCOO] F.S.                              | 0.57                      | -0.42              | -                      | -0.08                  | -7.94                  |
| [TetrazC <sub>1</sub> COO] I.S. <sup>6</sup>    | 0.78 & 0.53               | -0.60 & -0.71      | -                      | -                      | -6.31                  |
| [TetrazC <sub>1</sub> COO] Interm. <sup>6</sup> | 0.72                      | -0.54              | -0.05                  | -0.11                  | -4.20                  |
| [TetrazC <sub>1</sub> COO] F.S. <sup>6</sup>    | 0.73                      | -0.65              | -                      | -0.11                  | -6.25                  |
| [2 – ClPhC <sub>1</sub> OHCOO] I.S.             | 0.71 & 0.58               | -0.61 & -0.62      | -                      | -                      | -7.43                  |
| [2 – ClPhC <sub>1</sub> OHCOO] Interm.          | 0.61                      | -0.49              | 0.00                   | -0.08                  | -5.56                  |
| [2 – ClPhC <sub>1</sub> OHCOO] F.S.             | 0.62                      | -0.47              | -                      | -0.12                  | -7.55                  |
| [PhSC <sub>1</sub> COO] I.S.                    | 0.65 & 0.56               | -0.58 & -0.62      | -                      | -                      | -6.84                  |
| [PhSC <sub>1</sub> COO] Interm.                 | 0.52                      | -0.49              | 0.09                   | -0.07                  | -5.04                  |
| [PhSC <sub>1</sub> COO] F.S.                    | 0.65                      | -0.54              | -                      | -0.11                  | -6.94                  |
| [PhC <sub>1</sub> COO] I.S.                     | 0.58 & 0.63               | -0.62 & -0.58      | -                      | -                      | -6.07                  |
| [PhC <sub>1</sub> COO] Interm.                  | 0.70                      | -0.48              | -0.06                  | -0.17                  | -4.26                  |
| [PhC <sub>1</sub> COO] F.S.                     | 0.57                      | -0.49              | -                      | -0.10                  | -6.58                  |
| [C <sub>1</sub> COO] I.S.                       | 0.61 & 0.62               | -0.61 & -0.61      | -                      | -                      | -6.13                  |
| [C <sub>1</sub> COO] Interm.                    | 0.68                      | -0.51              | 0.01                   | -0.16                  | -4.47                  |
| [C <sub>1</sub> COO] F.S.                       | 0.65                      | -0.51              | -                      | -0.13                  | -6.57                  |
| [MeC <sub>3</sub> COO] I.S.                     | 0.62 & 0.65               | -0.62 & -0.64      | -                      | -                      | -6.12                  |
| [MeC <sub>3</sub> COO] Interm.                  | 0.65                      | -0.54              | 0.07                   | -0.17                  | -4.44                  |
| [MeC <sub>3</sub> COO] F.S.                     | 0.67                      | -0.52              | -                      | -0.15                  | -6.52                  |
| [c–C <sub>6</sub> COO] I.S.                     | 0.63 & 0.66               | -0.61 & -0.68      | -                      | -                      | -5.95                  |
| [c–C <sub>6</sub> COO] Interm.                  | 0.76                      | -0.50              | -0.08                  | -0.15                  | -4.31                  |
| [c–C <sub>6</sub> COO] F.S.                     | 0.61                      | -0.49              | -                      | -0.13                  | -6.53                  |
| [C <sub>5</sub> COO] I.S.                       | 0.63 & 0.62               | -0.62 & -0.61      | -                      | -                      | -6.12                  |
| [C <sub>5</sub> COO] Interm.                    | 0.63                      | -0.54              | 0.12                   | -0.17                  | -4.72                  |
| [C <sub>5</sub> COO] F.S.                       | 0.71                      | -0.52              | -                      | -0.13                  | -6.46                  |
| [C <sub>11</sub> COO] I.S.                      | 0.64 & 0.65               | -0.62 & -0.64      | -                      | -                      | -6.02                  |
| [C <sub>11</sub> COO] Interm.                   | 0.72                      | -0.52              | -0.01                  | -0.15                  | -4.43                  |
| [C <sub>11</sub> COO] F.S.                      | 0.64                      | -0.57              | -                      | -0.11                  | -6.42                  |
| [Me <sub>4</sub> C <sub>4</sub> COO] I.S.       | 0.69 & 0.58               | -0.62 & -0.64      | -                      | -                      | -6.04                  |
| [Me <sub>4</sub> C <sub>4</sub> COO] Interm.    | 0.65                      | -0.57              | 0.12                   | -0.17                  | -4.67                  |
| [Me <sub>4</sub> C <sub>4</sub> COO] F.S.       | 0.62                      | -0.53              | -                      | -0.13                  | -6.44                  |

In the intermediate state, the formation of the [P<sub>4,4,4,4</sub>][RCOO]-HOOCR complex is supported by the presence of a slight negative charge on the carboxylic acid between -0.07 and -0.17e with specific values

for each IL reported in Table S15. This charge arises from a transfer of charge from the carboxylate anion to the neutral carboxylic acid, facilitated by the formation of a hydrogen bond. The negative charge carried by  $[\text{RCOO}]^-$  decreases from approximately  $-0.6e$  to  $-0.53e$ . In the final state, although the partial charge on  $\text{HOOCR}$  is slightly less negative, the presence of the complex linked by a hydrogen bond is still evident due to a similar charge transfer (between  $-0.08$  and  $-0.15e$ ). The positive charge on the phosphonium cation increases upon the formation of this complex, as the hydrogen bond formation reduces the charge transfer between the cation and the anion.

Molecular orbital analysis was performed on the HOMOs of the  $\text{CO}_2$  absorption mechanism steps for each IL, and their corresponding energies are reported in Table S15. This analysis provides insight into the stabilization of ILs upon  $\text{CO}_2$  capture. In all cases, the HOMO is destabilized due to the acid-base reaction between the phosphonium cation and the carboxylate anion, as indicated by the positive  $\Delta E$ . Among the ILs,  $[\text{P}_{4,4,4,4}][\text{Me}_4\text{C}_4\text{COO}]$  exhibits the smallest  $\Delta E$  (1.37 eV), which aligns with the most favorable intermediate step discussed earlier. The  $\Delta E$  values for the other ILs fall within an intermediate range, at the exception of  $[\text{P}_{4,4,4,4}][\text{TetrazC}_1\text{COO}]$ ,  $[\text{P}_{4,4,4,4}][\text{PhSC}_1\text{COO}]$ ,  $[\text{P}_{4,4,4,4}][2-\text{ClPyCOO}]$  and  $[\text{P}_{4,4,4,4}][2-\text{ClPhC}_1\text{OHCOO}]$  with higher  $\Delta E$ . It is in agreement with their highly positive  $\Delta G$  and the lower basicity of their carboxylate anions. Upon the addition of the ylide to  $\text{CO}_2$ , a significant stabilization of the HOMOs is observed, leading to a decrease in  $E(\text{HOMO})$  by approximately 0.4–0.5 eV compared to the initial state. This decrease indicates that the final state is more energetically favorable compared to the initial state. It aligns with the negative  $\Delta_r G^\circ$  values calculated for most ILs, except for the four previously mentioned ILs, which exhibit almost no reactivity towards  $\text{CO}_2$ . Only a slightly positive or near-zero variation in  $E(\text{HOMO})$  between the final and initial states is noticed which is consistent with the positive  $\Delta_r G^\circ$  determined.

The optimized structures of the intermediate step and the final step are shown in Figure S47. In the intermediate state, following the abstraction of the acidic proton by the carboxylate anion, it is possible to observe the newly formed complex between the free pair of IL and the carboxylic acid  $[\text{P}_{4,4,4,4}][\text{RCOO}]-\text{HOOCR}$  as illustrated in Figure S47 (left). The formation of this complex is driven by the establishment of a hydrogen bond between the negatively charged oxygen atom of the carboxylate and the  $-\text{OH}$  group of the carboxylic acid. This complex is still present after the addition of the ylide on  $\text{CO}_2$  (Figure S47 (right)). In the  $[\text{P}_{4,4,4,4}][\text{C}_{11}\text{COO}]-\text{HOCC}_{11}$  complex, the distance between the acidic proton and the oxygen atom ( $d(\text{OH}-\text{OCOO}^-)$ ) is 1.36 Å, while the corresponding angle ( $\widehat{\text{OHO}}$ ) is  $178.2^\circ$ , satisfying the hydrogen bond criteria. The values of  $d(\text{OH}-\text{O}_{\text{COO}^-})$  and  $\widehat{\text{OHO}}$  for the other ILs all fall within a similar

range, without any specific correlation between these parameters and the basicity of the carboxylate anion in water.

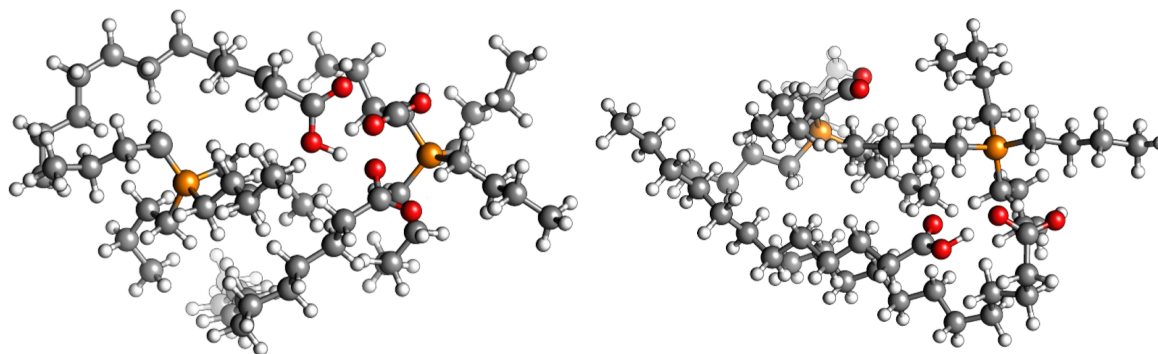

Figure S47 – The most favorable optimized structures of (left) the intermediate state and (right) the product of the reaction between  $[P_{4,4,4,4}][C_{11}COO]$  and  $CO_2$  as well as the  $[P_{4,4,4,4}][RCOO]-HOOCR$  complex.

The peculiar spatial configurations found in the neat ILs containing rings in the carboxylate anions<sup>1</sup> were similar even in presence of  $CO_2$  as depicted on the CDFs of the angle between two adjacent rings as a function of the RDF between their center of mass in the ESI Figure S45.



## References

- (1) Scaglione, N.; Avila, J.; Bakis, E.; Padua, A.; Gomes, M. C. *Phys. Chem. Chem. Phys.* **2023**, *25*, 15325–15339.
- (2) Jacquemin, J.; Ge, R.; Nancarrow, P.; Rooney, D. W.; Costa Gomes, M. F.; Pádua, A. A. H.; Hardacre, C. *J. Chem. Eng. Data* **2008**, *53*, 716–726.
- (3) Goodrich, B. F.; de la Fuente, J. C.; Gurkan, B. E.; Lopez, Z. K.; Price, E. A.; Huang, Y.; Brennecke, J. F. *J. Phys. Chem. B* **2011**, *115*, 9140–9150.
- (4) Deng, Y.; Morrissey, S.; Gathergood, N.; Delort, A.-M.; Husson, P.; Costa Gomes, M. F. *ChemSusChem* **2010**, *3*, 377–385.
- (5) Baranyai, K. J.; Deacon, G. B.; MacFarlane, D. R.; Pringle, J. M.; Scott, J. L. *Aust. J. Chem.* **204**, *57*, 145–147.
- (6) Scaglione, N.; Wylie, L.; Padua, A.; Costa Gomes, M. *Submitted* **2024**, *00*, 000–000.
- (7) Padua, A. H. Cl&Pol. (accessed 2021); <https://github.com/paduagroup/clandpol>.
- (8) Wu, B.; Yamashita, Y.; Endo, T.; Takahashi, K.; Castner, E. W. *J. Chem. Phys.* **2016**, *145*, 244506.
- (9) Gurau, G.; Rodríguez, H.; Kelley, S. P.; Janiczek, P.; Kalb, R. S.; Rogers, R. D. Demonstration of Chemisorption of Carbon Dioxide in 1,3-Dialkylimidazolium Acetate Ionic Liquids. *Angew. Chem. Int. Ed.* **2011**, *50*, 12024–12026.
- (10) Lepre, L. F.; Szala-Bilnik, J.; Pison, L.; Traíkia, M.; Pádua, A. a. H.; Ando, R. A.; Gomes, M. F. C. Can the tricyanomethanide anion improve CO<sub>2</sub> absorption by acetate-based ionic liquids? *Phys. Chem. Chem. Phys.* **2017**, *19*, 12431–12440.
